1 **A cell surface O-glycosylated peptide, AGP21, acts on the brassinosteroid pathway and modu-**  
2 **lates root hair cell fate**

3

4

5 Cecilia Borassi<sup>1,#</sup>, Javier Gloazzo Dorosz<sup>1,#,\*</sup>, Martiniano M. Ricardi<sup>2,#,\*\*</sup>, Laercio Pol Fachin<sup>3</sup>,  
6 Mariana Carignani Sardoy<sup>1</sup>, Eliana Marzol<sup>1</sup>, Silvina Mangano<sup>1</sup>, Diana Rosa Rodríguez García<sup>1</sup>,  
7 Javier Martínez Pacheco<sup>1</sup>, Yossmayer del Carmen Rondón Guerrero<sup>1</sup>, Silvia M. Velasquez<sup>1,\*\*\*</sup>,  
8 Bianca Villavicencio<sup>4</sup>, Marina Ciancia<sup>5</sup>, Georg Seifert<sup>6</sup>, Hugo Verli<sup>4</sup> & José M. Estevez<sup>1,7,†</sup>

9

10

11 <sup>1</sup>Fundación Instituto Leloir, Av. Patricias Argentinas 435, Buenos Aires CP C1405BWE, Argentina.

12 <sup>2</sup>Instituto de Fisiología, Biología Molecular y Neurociencias (IFIByNE-CONICET), Departamento de  
13 Fisiología y Biología Molecular y Celular (FBMC), Facultad de Ciencias Exactas y Naturales, Uni-  
14 versidad de Buenos Aires C1428EGA, Argentina.

15 <sup>3</sup>Centro Universitário CESMAC, Maceió, Brazil.

16 <sup>4</sup>Centro de Biotecnología, Universidade Federal do Rio Grande do Sul CP 15005, Porto Alegre  
17 91500-970 RS, Brazil.

18 <sup>5</sup>Universidad de Buenos Aires, Facultad de Agronomía, Departamento de Biología Aplicada y  
19 Alimentos, Cátedra de Química de Biomoléculas, Buenos Aires, Argentina and CONICET-  
20 Universidad de Buenos Aires, Centro de Investigación de Hidratos de Carbono (CIHIDECAR), Bue-  
21 nos Aires, Argentina.

22 <sup>6</sup>University of Natural Resources and Life Science, BOKU Vienna, Department of Applied Genetics  
23 and Cell Biology, Muthgasse 11 A-1190, Vienna, Austria.

24 <sup>7</sup>Centro de Biotecnología Vegetal (CBV), Facultad de Ciencias de la Vida, Universidad Andrés Be-  
25 llo, Santiago, Chile.

26

27

28 #co-first authors

29 †Correspondence should be addressed. Email: [jestevez@leloir.org.ar](mailto:jestevez@leloir.org.ar)

30

31

32 Word count 3,399

33

34

35

36

37

38

39

40

41 \* Current address: Grupo de Investigación Interdisciplinario en Ciencias Naturales, Colegio Gim-  
42 nasio Vermont, 111166 Bogotá, Colombia.

43 \*\* Current address: Developmental Genetics, University of Tübingen, 72076 Tübingen, Germany.

44 \*\*\* Current address: University of Natural Resources and Life Science, BOKU Vienna, Department  
45 of Applied Genetics and Cell Biology, Muthgasse 11 A-1190, Vienna, Austria.

46 **Highlights**

47

- 48 • **Perturbation of AGPs and the loss of AGP21 peptide trigger an abnormal RH cell fate.**
- 49
- 50 • **AGP21-mediated repression of *GL2* expression activates the expression of RSL4 and EXP7**
- 51 **root hair proteins.**
- 52
- 53 • **AGP21 peptide acts in both a BR-dependent and BR-independent manner, with both**
- 54 **pathways converging on a BIN2 downstream signalling cascade to controls *GL2* expression.**
- 55

56

57

58

**Summary**

59

60 **Root hairs (RHs) develop from specialized epidermal cells called trichoblasts, whereas epidermal**

61 **cells that lack RHs are known as atrichoblasts. The mechanism controlling root epidermal**

62 **cell fate is only partially understood. Root epidermis cell fate is regulated by a transcription**

63 **factor complex that promotes the expression of the homeodomain protein GLABRA 2 (*GL2*),**

64 **which blocks RH development by inhibiting ROOT HAIR DEFECTIVE 6 (*RHD6*). Suppression of**

65 ***GL2* expression activates *RHD6*, a series of downstream TFs including ROOT HAIR DEFECTIVE 6**

66 **LIKE-4 (*RSL4* [Yi et al. 2010]) and their target genes, and causes epidermal cells to develop into**

67 **RHs. Brassinosteroids (BRs) influence root epidermis cell fate. In the absence of BRs, phos-**

68 **phorylated BIN2 (a Type-II GSK3-like kinase) inhibits a protein complex that directly**

69 **downregulates *GL2* [Chen et al. 2014]. Here, we demonstrate that the genetic and pharmaco-**

70 **logical perturbation of the arabinogalactan protein (AGP) AGP21 in *Arabidopsis thaliana*, trig-**

71 **gers aberrant RH development, similar to that observed in plants with defective BR signaling.**

72 **We reveal that an *O*-glycosylated AGP21 peptide, which is positively regulated by BZR1, a**

73 **transcription factor activated by BR signaling, affects RH cell fate by altering *GL2* expression in**

74 **a BIN2-dependent manner. These results indicate that perturbation of a cell surface AGP dis-**

75 **rupts BR perception and inhibits the downstream effect of BIN2 on the RH repressor *GL2* in**

76 **root epidermal cells. In addition, AGP21 also acts in a BR-independent, AGP-dependent mode**

77 **that together with BIN2 signalling cascade controls RH cell fate.**

78

79

80 Word count **241**

## 81 Introduction

82

83 Plant roots not only anchor the plant into the soil but allow them to absorb water and nutrients  
84 from the soil. Root hairs (RHs) are single cell protrusions developed from the epidermis that in-  
85 crease the root surface area exposed to the soil enhancing water and nutrients uptake. Many  
86 factors determine whether, or not, an epidermal cell will develop into a RH. These factors in-  
87 clude both, environmental cues (such as nutrients in the soil) and signals from the plant itself,  
88 such as hormones like brassinosteroids (BRs), ABA, ethylene and auxin (Van Hengel et al. 2004;  
89 Masucci and Schiefelbein 1994, 1996; Kuppusamy et al., 2009). RH cell fate in the model plant  
90 *Arabidopsis* is controlled by a well-known developmental program, regulated by a complex of  
91 transcription factors composed by WEREWOLF (WER)-GLABRA3 (GL3)/ENHANCER OF GLABRA3  
92 (EGL3)-TRANSPARENT GLABRA1 (TTG1) that promotes the expression of the homeodomain pro-  
93 tein GLABRA 2 (GL2) (Ryu et al. 2005; Song et al. 2011; Schiefelbein et al. 2014; Balcerowicz et al.  
94 2015), which ultimately blocks the root hair pathway by inhibiting ROOT HAIR DEFECTIVE 6  
95 (RHD6) (Lin et al. 2015). The suppression of GL2 expression triggers epidermal cells to enter into  
96 the root hair cell fate program by the concomitant activation of RHD6 and a well-defined down-  
97 stream gene network. As a consequence, RH and non-RH cell files are patterned alternately in  
98 rows within the root epidermis. In trichoblasts, a second transcription factor complex composed  
99 by CAPRICE (CPC)-GL3/EGL3-TTG1 suppresses GL2 expression (Schiefelbein et al. 2014), forcing  
100 cells to enter the RH cell fate program via concomitant RHD6 activation and downstream TFs,  
101 including RSL4, and RH genes (Yi et al. 2010). The plant steroid hormones, BRs play essential  
102 roles in regulating many developmental processes (Savaldi-Goldstein et al., 2007; 2010; Hacham  
103 et al., 2011; Yang et al., 2011). BRs are perceived by the receptor kinase BRASSINOSTEROID IN-  
104 SENSITIVE 1 (BRI1) (Li & Chory, 1997; Hothorn et al., 2011; She et al., 2011). One of the BRI1 sub-  
105 strate, BR-SIGNALING KINASE (BSK), transduces the BR signaling through *bri1* SUPPRESSORS 1  
106 (BSU1) to inactivate a GSK3-like kinase BRASSINOSTEROID INSENSITIVE 2 (BIN2), which triggers  
107 high levels of the dephosphorylated form of transcriptional factors BRI1 EMS SUPPRESSOR 1  
108 (BES1)/BRASSINAZOLE RESISTANT 1 (BZR1) in the nucleus to regulate gene expression (Yan et al.  
109 2009; Yang et al., 2011). In recent years, a molecular mechanism was proposed by which BR sig-  
110 naling controls RH cell fate by inhibiting BIN2 phosphorylation activity to modulate *GL2* expres-  
111 sion (Chen et al. 2014). In atrichoblasts, BIN2 phosphorylates TTG1, controlling protein complex  
112 TTG1-WER-GL3/EGL3 activity, and stimulating *GL2* expression (Chen et al. 2014).

113

114 Plant cell surface proteoglycans known as arabinogalactan proteins (AGPs) function in a broad  
115 developmental processes such as cell proliferation, cell expansion, organ extension, and somatic  
116 embryogenesis (Tan et al. 2004; Seifert & Roberts 2007; Pereira et al. 2015; Ma et al. 2018). The  
117 precise mechanisms underlying AGP action in these processes are completely unknown (Ma et  
118 al. 2018). AGP peptides are post-translationally modified in the ER-Golgi, undergoing signal pep-  
119 tide (SP) removal, proline-hydroxylation/Hyp-*O*-glycosylation, and C-terminal GPI anchor signal  
120 (GPI-AS) addition (Schultz et al. 2004; Ma et al. 2018). Processed mature AGP-peptides are 10–  
121 13 amino acids long and bear few putative *O*-glycosylation sites (*O*-AG). Few prolines in the AGP

122 peptides are hydroxylated *in vivo* as Hyp (Hyp=O), suggesting that AGP peptides are *O*-  
123 glycosylated at maturity (Schultz et al. 2004). All these posttranslational modifications make the  
124 study of AGPs very complex with almost no defined biological functions of **any individual AGP**  
125 **(Ma et al. 2018)**. Interestingly, in this work we have identified that disruption of plant specific  
126 AGPs, and in particular of a single *O*-glycosylated AGP peptide (AGP21), interfere in a specific  
127 manner with BR perception and BIN2 downstream effect on the repression of RH development.  
128 We have found that an *O*-glycosylated AGP21-peptide positively regulated by the BR transcrip-  
129 tion factor BZR1, impacts on RH cell fate by controlling GL2 expression. The molecular mecha-  
130 nism proposed here for AGP21-regulated RH cell fate could be possibly extrapolated to other  
131 developmental regulated programs that are under the control of the BR pathway (e.g. xylem and  
132 phloem differentiation, pro-cambium fate, etc).

133

## 134 **Results and Discussion**

135

### 136 **AGP perturbation influences root hair (RH) cell fate programming**

137 To determine whether *O*-glycosylated AGPs regulate specific RH developmental processes, we  
138 exposed roots of *Arabidopsis thaliana* to  $\beta$ -glucosyl Yariv ( $\beta$ -Glc-Y), which specifically binds struc-  
139 tures in the *O*-glycans of AGPs: oligosaccharides with at least 5–7 units of 3-linked *O*-galactoses  
140 (Yariv et al. 1967; Kitazawa et al. 2013).  $\beta$ -Glc-Y-linked AGP complexes on the cell surface induce  
141 AGP aggregation and disrupt native protein distribution, triggering developmental reprogram-  
142 ming (Guan & Nothnagel 2004; Sardar et al. 2006).  $\alpha$ -mannosyl Yariv ( $\alpha$ -Man-Y), an analog that  
143 does not bind to AGPs, served as the control. While  $\alpha$ -Man-Y treatment did not affect RH cell  
144 fate ( $\approx$ 2–5% of total RHs that are contiguous),  $\beta$ -Glc-Y treatment increased contiguous RH devel-  
145 opment ( $\approx$ 30–40%) (**Figure S1A**), suggesting that *O*-glycosylated AGPs influence RH formation.

146

147 To test whether *O*-glycans on hydroxyproline-rich glycoproteins (HRGPs) alter RH cell fate, we  
148 blocked proline 4-hydroxylase enzymes (P4Hs) that catalyse proline (Pro)-hydroxylation into hy-  
149 droxyl-proline units (Hyp), the subsequent step of HRGP *O*-glycosylation (Velasquez et al. 2011,  
150 2015a). Two P4H inhibitors,  $\alpha,\alpha$ -dipyridyl (DP) and ethyl-3,4-dihydroxybenzoate (EDHB), prevent  
151 Pro-hydroxylation (Barnett 1970; Majamaa et al. 1986); both increased contiguous RH develop-  
152 ment to  $\approx$ 15–20% (**Figure S1B**). Additionally, *p4h5* (a key P4H in roots [Velasquez et al. 2011;  
153 2015a]) and four glycosyltransferase mutants defective in AGP *O*-glycosylation (*hpgt* triple mu-  
154 tant; *ray1*, *galt29A*, and *fut4 fut6*) (see **Table S1**) showed significantly increased ( $\approx$ 8–20%) ec-  
155 topic RH development (**Figure 1A**), substantiating the previous report that the triple mutant  
156 *hpgt* mutant has an increased RH density (Ogawa-Ohnishi & Matsubayashi 2015). These mutants  
157 were mostly insensitive to  $\beta$ -Glc-Y; however, the treatment increased the number of contiguous  
158 RHs in *fut4 fut6*, although to a lesser extent than in the wild type (**Figure 1B**).  $\beta$ -Glc-Y inhibits  
159 root cell expansion (Willats & Knox 1996; Ding & Zhu 1997). Glycosyltransferase (GT) mutations  
160 affecting extensin (EXTs) *O*-glycosylation (e.g. *rra3* and *sgt1 rra3*; **Table S1**) drastically affect RH  
161 cell elongation (Velasquez et al. 2015b). Intriguingly, these mutations did not affect RH cell fate,  
162 and  $\beta$ -Glc-Y stimulated ectopic RH development, indicating that EXT *O*-glycosylation does not

163 function in RH cell fate reprogramming (**Table S1, Figure 1C**), and specifically *O*-glycans attached  
164 to AGPs do. *P4H5* and *AGP-related GTs* (e.g. *RAY1*, *GALT29A*, *HPGT1-HPGT3* and *FUT4/FUT6*), are  
165 expressed in the root epidermis elongation and differentiation zones (**Supplementary Item 1**).  
166 Under-arabinosylated AGPs in *ray1* and under-*O*-fucosylated AGPs in *fut4 fut6* show similar root  
167 growth inhibition (Liang et al. 2013; Trypona et al. 2014), highlighting a key role for AGP *O*-  
168 glycans in regulating root cell development, albeit by unknown mechanisms.

169

### 170 **The BR–BZR1 pathway regulates AGP21 expression**

171 Brassinosteroid (BR) signaling regulates RH cell patterning (Cheng et al. 2015). The BR-insensitive  
172 mutant, *bri1-116*, developed many (~20%) contiguous RH cells (**Supplementary Item 2A**),  
173 resembling plants subjected to  $\beta$ -Glc-Y and DP/EDHB treatments (**Figure S1**). The *agp21*, *p4h5*,  
174 *hpgt* triple mutant, *ray1-1*, *galt29A*, and *fut4 fut6* mutants exhibited similar phenotypes,  
175 suggesting that interplay between cell surface AGPs and BR signaling determines RH cell fate. As  
176 chromatin-immunoprecipitation (ChIP)-sequencing and RNA-sequencing indicate that BZR1  
177 directly upregulates *AGP* expression, most predominantly *AGP21* (Sun et al. 2010), we  
178 investigated how root epidermal BR signaling regulates *AGP21* expression. Since the *AGP21*  
179 regulatory region contains one BZR1 binding motif (E-BOX, CATGTG at -279 bp relative to ATG  
180 start codon), we tested whether BR directly modulates *AGP21* expression. Compared with no  
181 treatment, 100 nM BL (brassinolide, BR's most active form) enhanced of both *AGP21p::GFP*  
182 (transcriptional reporter) and *AGP21p::V-AGP21* (V= Venus tag; translational reporter)  
183 expression (**Supplementary Item 2B–C**). Expression of *AGP21p::GFP* in *bri1-116* resulted in lower  
184 *AGP21* expression than in untreated wild type (**Supplementary Item 2B**), confirming that BR-  
185 mediated BZR1 controls *AGP21* expression in the root.

186

187 Trichoblasts and atrichoblasts expressed V-AGP21 peptide in a discontinuous pattern  
188 (**Figure S1C**), indicating that some root epidermal cells lacked AGP21. Treatment with  $\beta$ -Glc-Y—  
189 but not  $\alpha$ -Man-Y—resulted in excess *AGP21p::Venus-AGP21* at transverse cell walls (**Figure S1C**).  
190 We used the *BZRp::BZR1-YFP* reporter to test whether disrupting PM AGPs with  $\beta$ -Glc-Y would  
191 downregulate the response to BL (**Supplementary Item 3A**). Treatment with 100 nM BL induced  
192 *BZR1* expression, whereas exposure to  $\beta$ -Glc-Y or  $\beta$ -Glc-Y followed by 100 nM BL suppressed  
193 *BZR1* expression, suggesting that AGP disruption affects BR perception and downstream BZR1-  
194 mediated signaling. However, global BR–BZR1/BES1-mediated transcriptional responses are not  
195 involved in the anomalous RH cell fate phenotype, because lines constitutively expressing BZR1  
196 (*BZR1-D*) and BES1 (*BES1-D*), overexpressing BZR1 and BES1 lines, and CRISPR-CAS9 null *bzr1* and  
197 *bes1* mutants showed no anomalous phenotypes (**Supplementary Item 3B**).

198

### 199 ***O*-glycosylated AGP21 peptide influences RH cell fate**

200 The molecular link to BR–BZR1 signaling suggested that AGP21 function in RH cell fate  
201 determination. The *AGP21* deficient mutant *agp21* (**Supplementary Item 4A–B**), exhibited  
202 ectopic contiguous RHs (**Figure 2B**). Both *AGP21* expression under its endogenous promoter  
203 (*AGP21p::V-AGP21/agp21*) and overexpression (*35Sp::V-AGP21/agp21*) restored a wild type RH

204 phenotype and patterning to *agp21* (**Figure 2B**), confirming that deficient *AGP21* expression  
205 causes contiguous RH development. Furthermore, while  $\beta$ -Glc-Y treatment triggered up to  $\approx$ 30-  
206 40% of contiguous RH (vs.  $\approx$ 2–5% induced by  $\alpha$ -Man-Y) in the wild type (**Figure S1**), it induced no  
207 additional anomalous RH in *agp21* (vs.  $\alpha$ -Man-Y treatment or untreated roots) (**Figure 2B**). We  
208 tested whether the closely related BZR1-induced peptide AGP15 functions with AGP21. *agp15*  
209 (**Supplementary Item 4C–D**) exhibited a milder phenotype than *agp21*, and the double  
210 *agp15 agp21* double mutant had no additional effects to *agp21* (**Supplementary Item 4E**).  
211 Together, these results confirm that  $\beta$ -Glc-Y acts through *O*-glycosylated AGP21 to stimulate  
212 contiguous RH development.

213

#### 214 **RH cell fate determination requires *O*-glycosylation of the AGP21 peptide**

215 To determine whether functional AGP21 requires *O*-glycosylation, three putative *O*-glycosylation  
216 sites were mutated (Pro $\rightarrow$ Ala) (**Figure 2A**) and driven by the endogenous *AGP21* promoter in  
217 *agp21* (*AGP21p::V-AGP21<sup>ALA</sup>/agp21*). Mass spectrometry had detected that all three proline  
218 units (Pro/P) within the AGP21 sequence ATVEAPAPSPTS can be hydroxylated as  
219 ATVEAQ $\underline{O}$ AQSOTS (Hyp= $\underline{O}$ ) (Schultz et al. 2004), indicating likely sites for *O*-glycosylation. Even  
220 though AGP21<sup>ALA</sup> protein was detected in root epidermal cells (**Figure S2B**), AGP21<sup>ALA</sup> failed to  
221 rescue the *agp21* RH phenotype (**Figure 2B–C**), confirming that Hyp-linked *O*-glycans in AGP21  
222 are required for its function in RH cell fate. Moreover,  $\beta$ -Glc-Y treatment did not induce anoma-  
223 lous RH cell fate in AGP21<sup>ALA</sup> plants demonstrating that  $\beta$ -Glc-Y requires *O*-glycans to alter RH  
224 development.

225

226 To localize AGP21 within cells, we transiently expressed *V-AGP21* in *Nicotiana benthamiana* and  
227 induced plasmolysis in epidermal cells with sorbitol (80 mM). Although some signal remained  
228 within cells, most *V-AGP21* signal was secreted to the apoplast (i.e., between the cell wall and  
229 the PM) (**Figure 2C**). When transiently expressed at high levels, AGPs with GPI-AS typically follow  
230 this pattern (Zavaliev et al. 2016). Under its endogenous promoter, most AGP21 signal localized  
231 to the cell surface (**Figure S2A**). *V-AGP21<sup>ALA</sup>*, however, never reached the cell surface; retention  
232 in the secretory pathway could indicate that *O*-glycans direct AGP to the PM–cell surface (**Fig-  
233 ure S2A–B**). These data corroborate previous reports of a requirement for *O*-glycans in the se-  
234 cretion and targeting of AGPs and related fasciclin-like AGPs (Xu et al 2008; Xue et al 2017).

235

236 We tested the hypothesis that AGP21 is processed and modified during its synthesis along the  
237 secretory pathway. Using immunoblot analysis, we examined the apparent molecular weight of  
238 AGP21 peptide in transient AGP21-overexpressing plants and in *AGP21p::V-AGP21* plants (**Fig-  
239 ure 2D**). In the overexpressing plants, most AGP21 peptide was detected as a strong broad band  
240 around  $\approx$ 100–120 kDa with minor bands at  $\approx$ 80 and  $\approx$ 55 kDa, whereas endogenously driven  
241 AGP21 produced a stronger band at  $\approx$ 80 kDa and lacked the band at  $\approx$ 55 kDa, suggesting that, in  
242 both cases, AGP21 peptide was present in a tri-*O*-glycosylated form. Mature peptide with no  
243 posttranslational modifications is approximately 30 kDa; the extra bands could be intermediate  
244 single- and di-*O*-glycosylated forms of AGP21 peptide. An apparent molecular shift of  $\approx$ 25–

245 30 kDa for each putative *O*-glycosylation site in AGP21 accords with AGP14 peptide, whose pro-  
246 tein sequence is highly similar (Ogawa-Ohnishi & Matsubayashi 2015), and with the electropho-  
247 retic migration of an AGP-xylogen molecule that contains two arabinogalactan-*O*-Hyp sites (Mo-  
248 tose et al. 2004). V-AGP21<sup>ALA</sup>, which lacks *O*-glycans, is not targeted to the cell surface, formed  
249 puncta structures (Figure S2B) and showed one band close to ~55 kDa suggesting the presence a  
250 dimer (Figure 2D). The band close to ~30 kDa might indicate the monomer. The lack of *O*-glycans  
251 V-AGP21<sup>ALA</sup>s may cause to interact with itself and this is compatible with the punctuated struc-  
252 ture visualized in the root epidermal cells (Figure S2B). A detailed analysis is required to charac-  
253 terize *O*-glycosylation in AGP21.

254

### 255 ***O*-glycans stabilize AGP21 peptide's functional conformation**

256 To address the effect of *O*-glycan on the conformation and stability of AGP21 peptide, we  
257 modeled a minimal, 15-sugar Hyp-*O*-linked arabinogalactan (AG) structure  
258 ([ATVEAP(O)AP(O)SP(O)TS], Supplementary Item 5A–B). This is the simplest carbohydrate  
259 structure characterized for a single AGP synthetic peptide (Tan et al. 2004), although complex,  
260 150 residues structures exist for several AGPs (Kitazawa et al. 2013). To assess the conformation  
261 of AGP21 peptide and the effect of *O*-glycosylation, molecular dynamics (MD) simulations  
262 considered three nonglycosylated peptides (with alanines [nG-Ala], prolines [nG-Pro], or  
263 hydroxyprolines residues [nG-Hyp], respectively) and one *O*-glycosylated peptide with three  
264 Hyp-*O*-glycans (Supplementary Item 5C). In the MD simulations, the root mean square deviation  
265 (RMSD) varied up to ~6 Å (Supplementary Item 5D), indicating that peptide structure may have  
266 deviated from the starting type-II polyproline helix. By contrast, larger conformational  
267 stabilization effects were observed in the *O*-glycosylated peptide (Supplementary Item 5E).  
268 Individual residue RMSF analysis indicated that the peptide's stiffer region depended on the MD  
269 conditions applied (Supplementary Item 5F). To characterize conformational profiles, we  
270 measured the angle formed by four consecutive alpha carbon atoms ( $\zeta$  angle) (Table S3). The  
271  $\zeta$  angle of a type-II polyproline helix is  $-110 \pm 15^\circ$ . In this context, the *O*-glycosylated AOAOSOTS  
272 peptide structure is slightly extended between Pro2–Thr7, as observed by  $\zeta$  angles 2–4 closer to  
273  $180^\circ$  (Table S3). Our analysis suggests that *O*-linked glycans affect the conformation and stability  
274 of AGP21 peptide. This conformational change could explain, at least in part, the failure of  
275 AGP21<sup>ALA</sup> to complement *agp21*. How this conformational change in mature AGP21 peptide  
276 without *O*-glycans affects its function in RH cell determination remains unclear.

277

### 278 **AGP21 acts in a BRI1–BIN2-dependent pathway to define RH cell fate**

279 We hypothesized that disrupting AGPs activity with  $\beta$ -Glc-Y, a mutation (i.e., *agp21*), or abnor-  
280 mal glycosylation, would interfere with BR perception and *GL2* expression. We treated the triple  
281 mutant *gsk* (*gsk triple: bin2-3 bil1 bil2*; BIL1, BIN2-like 1 and BIL2, BIN2-like 2), which almost  
282 completely lacks RH cells [1], with 5  $\mu$ M  $\beta$ -Glc-Y treatment. *Gsk triple* exhibited few contiguous  
283 RH cells (Figure 3), suggesting that  $\beta$ -Glc-Y requires BIN2-BIL1-BIL2 to alter cell fate. Interest-  
284 ingly,  $\beta$ -Glc-Y induced ~60% contiguous RHs (Figure 3) in the constitutively active mutant *bin2-1*  
285 (Li & Nam 2002). Furthermore,  $\beta$ -Glc-Y induced ~60% contiguous RHs in *bri1-116* (which lacks BR

286 signaling and has high BIN2 activity) and little response in *bri1-301* (a weak BRI1 mutant that  
287 retains some BR signaling and partial BIN2 repression). These data suggest that BR interferes  
288 with AGP-mediated RH cell fate reprogramming (**Figure 3A**), confirm that active BIN2, BIL1, and  
289 BIL2 are required for this reprogramming, and indicates the existence of a BR-independent re-  
290 sponse related AGPs perturbation with GSK3 proteins that induces RH cell fate.

291

292 As *BRI1* expression is similar in trichoblasts and atrichoblasts (Fridman et al., 2014), we sought to  
293 determine whether BRI1 acts differently in these cell types during RH cell fate determination  
294 (**Figures 3B**). We examined the effect of cell type-specific *BRI1* expression on the percentage of  
295 contiguous RHs in three plant lines, all in the *bri1-116* background: trichoblast-only  
296 (*COBL9p::BRI1/bri1-116*), atrichoblast-only (*GL2p::BRI1-GFP/bri1-116*), and expression in both  
297 cell types (*GL2p::BRI1 + COBL9p::BRI1/bri1-116*) (Hacham et al., 2011; Fridman et al., 2014). BRI1  
298 expression in atrichoblasts only did not rescue *bri1-116* (plants showed abundant contiguous  
299 RHs), lines that expressed BRI1 in trichoblasts or in both cell types were similar to wild type (**Fig-**  
300 **ure 3B**). Additionally, only *COBL9p::BRI1/bri1-116* was completely insensitive to  $\beta$ -Glc-Y while  
301 the other two lines exhibited more contiguous RHs. These data imply that only the BR pathway  
302 in atrichoblasts is linked to AGP disruption and ectopic RH development.

303

#### 304 **Disturbance or absence of AGP21 blocks GL2 expression**

305 We tracked epidermal cell fate and analyzed  $\beta$ -Glc-Y and  $\alpha$ -Man-Y's translational effects on  
306 several markers: an early RH marker (*RHD6p::RHD6-GFP*), a downstream transcription factor  
307 (*RSL4p::RSL4-GFP*), a late RH marker (*EXP7p::EXP7-GFP*), and an atrichoblast marker GL2  
308 (*GL2p::GL2-GFP*) (**Figure 4A–D**).  $\beta$ -Glc-Y, not  $\alpha$ -Man-Y, repressed GL2 expression and enhanced  
309 RHD6, RSL4 and EXP7 expression in contiguous epidermal cells (**Figure 4A–E**). This corroborates  
310 the effects of both  $\beta$ -Glc-Y and deficiencies in the AGP *O*-glycosylation pathway on contiguous  
311 epidermis cell development. When we expressed *RSL4p::RSL4-GFP* in *agp21*, two contiguous  
312 epidermis cells showed GFP expression, while this rarely occurred in wild type roots;  
313 *GL2p::GFP/agp21* showed discontinuous RH patterning similar to  $\beta$ -Glc-Y treatment (**Figure 4B**  
314 **and 4D**). This result implies feedback between aberrant AGP21, GL2 repression, and RHD6-RSL4  
315 and EXP7 upregulation in contiguous epidermal cell development (**Figure 4E**). Constitutively  
316 active *bin2-1* phenocopies *agp21* and  $\beta$ -Glc-Y treatment: it represses GL2 expression in some  
317 epidermal cells and enhances EXP7-GFP in contiguous epidermal cells, stimulating contiguous RH  
318 development (**Figure 4F–G**). This suggests that AGP21 acts on GL2 in BIN2-dependent manner  
319 and affects BR perception at the cell surface.

320

#### 321 **AGP21 influences cell surface BR perception, modifying RH cell fate**

322 To test whether AGP21 (and AGPs in general), affect BR perception, we treated roots with  
323 100 nM BL. Wild type roots exhibited repressed RH development as previously reported [1];  
324 *agp21* and three glycosyltransferase mutants (*triple hpgt*, *ray1* and *galt29A*) defective in AGP *O*-  
325 glycosylation were unaffected (**Figure S2C**), suggesting that *O*-glycosylated AGP21 promotes BR  
326 perception and signaling. We hypothesized that AGP21 would closely associate with BRI1–BAK1



327 receptors, possibly affecting BR perception and BIN2 signaling to influence RH cell fate. BRI1–  
328 BAK1 proteins form hetero-oligomers in specific microdomains at the PM (Wang et al. 2015)  
329 where the environment restricts lateral diffusion (Hutten et al. 2017). We examined whether  
330 AGP21 expressed in *Nicotiana benthamiana* colocalized with the BRI1 coreceptor BAK1  
331 (Figure S3A–B). V-AGP21 partially colocalized with BAK1-mRFP protein, suggesting they exist in  
332 close to the PM (Figure S3A). When epidermal cells were plasmolyzed, most AGP21 signal  
333 localized to the apoplast but some remained close to the PM (Figure S3B), implying that AGP21  
334 lies close to BAK1 and influences BR perception and BIN2-mediated RH cell fate programming in  
335 atrichoblasts. Immunoprecipitation failed to detect an interaction between V-AGP21 and BAK1-  
336 mRFP in a transient expression system (results not shown). Nonetheless, measuring direct  
337 physical interactions between *O*-glycosylated AGP21 and BRI1–BAK1 in the apoplast–PM space  
338 could support a direct interaction and would corroborate for the first time a role for an AGP  
339 peptide in BR perception on the plant cell surface.

340

### 341 Conclusions

342 In root epidermal cells, atrichoblast fate is the default, while environmental as well as endoge-  
343 nous cues like high levels of BRs promotes *GL2* expression in atrichoblasts to repress RH devel-  
344 opment (Cheng et al. 2014). In the absence of BRs, active P-BIN2 represses *GL2* expression and  
345 *RHD6* and *RSL4* expression proceeds, triggering RH development in atrichoblasts and producing  
346 contiguous RHs. Abnormal AGPs at the cell surface stimulate ectopic RH development similar to  
347 that observed in BR mutants. BZR1 regulates *AGP21* expression and the *O*-glycosylated cell sur-  
348 face peptide AGP21 modulates RH cell fate. We propose a model, in which the *O*-glycosylated  
349 AGP21 peptide is transiently linked to the PM by de GPI anchor and localizes close to BAK1 (and  
350 potentially also BRI1), and thereby influences BR perception and BIN2 (and BIL1-BIL2)-mediated  
351 responses, controlling root epidermal cell fate (Figure S4). In concordance with this scenario,  
352 other GPI anchor proteins (e.g. like LORELEI-like-GPI-anchored protein 2 and 3, LRE/LLG2,3) are  
353 able to interact with CrRLK1s (e.g. FERONIA and BUP1,2/ANXUR1,2) in the cell surface of polar  
354 growing plant cells (Li et al. 2015; 2016; Lui et al. 2016; Ge et al. 2019; Feng et al.2019). In addi-  
355 tion, a BR-independent response links AGP21 peptide (and AGPs) to a downstream BIN2 compo-  
356 nent that also promotes RH cell development via an unknown molecular connection. These re-  
357 sults imply an interesting parallel between plant AGPs and animal heparin sulfate proteoglycans  
358 (HSPGs), which are important coreceptors in signaling pathways mediated by growth factors,  
359 including members of Wnt/Wingless, Hedgehog, transforming growth factor- $\beta$ , and fibroblast  
360 growth factor family members (Lin 2004). The molecular mechanisms by which *O*-glycosylated  
361 AGP21 peptide affects BR perception by BRI1–BAK1 remain unclear. Future work should investi-  
362 gate the roles of AGP21 peptide and *O*-glycans in BR perception by root epidermal cells.

363 **Acknowledgements**

364 We thank ABRC (Ohio State University) for providing T-DNA lines seed lines. We would like to  
365 thank Dr. Sigal Savaldi-Goldstein for providing Gl2p::BRI1-GFP, COBL9p::BRI1-GFP and  
366 Gl2p::BRI1-GFP + COBL9p::BRI1-GFP reporter lines, Dr. Paul Dupree for providing *fut4* and *fut6*  
367 mutant lines, Dr. Santiago Mora García for providing *bzr1* and *bes1* mutant lines, Dr. Ana Caño  
368 Delgado for providing seeds of BRI1-GFP, *bin2-1* and BZR-YFP, and Dr. Gustavo Gudesblat for  
369 providing *gsk triple* mutant seeds. Dr. Malcolm Bennet and Dr. Liam Dolan for the RHD6-GFP and  
370 RSL4-GFP lines. This work was supported by grants from ANPCyT (PICT2014-0504, PICT2016-  
371 0132 and PICT2017-0066) and ICGEB CRP/ARG16-03 to J.M.E.

372

373 **Author Contribution**

374 C.B, J.G.D and M.M.R performed most of the experiments, analysed the data and wrote the pa-  
375 per. L.P.F and H.V. performed molecular dynamics simulations and analysed this data. M.C.S  
376 analysed the phenotype of glycosyltransferase mutants and BRI1-GFP reporters. B.V. analysed  
377 the molecular dynamics simulations data. M.C synthesized the  $\alpha$ -Man-Y and the  $\beta$ -Glc-Y  
378 reagents. G.S. commented on the project, read the manuscript, and commented on the results.  
379 S.M. and E.M. analysed the data and commented on the results. J.M.P., D.R.R.M., Y.R., and  
380 S.M.V commented on the results. J.M.E. designed research, supervised the project, and wrote  
381 the paper. This manuscript has not been published and is not under consideration for publica-  
382 tion elsewhere. All the authors have read the manuscript and have approved this submission.

383 **References**

- 384 Balcerowicz, D., Schoenaers, S. and Vissenberg, K. (2015). Cell fate determination and the switch  
385 from diffuse growth to planar polarity in Arabidopsis root epidermal cells. *Front. Plant Sci.* 6,  
386 949
- 387 Barnett, N.M. (1970) Dipyridyl-induced Cell Elongation and Inhibition of Cell Wall Hydroxyproline  
388 Biosynthesis. *Plant Physiol* 45: 188-191
- 389 Cheng, Y., Zhu, W., Chen, Y., Ito, S., Asami, T. and Wang, X. (2014). Brassinosteroids control root  
390 epidermal cell fate via direct regulation of a MYBbHLH-WD40 complex by GSK3-like kinases.  
391 *eLife* 3, e02525
- 392 Ding L. and Zhu JK. (1997). A role for arabinogalactan-proteins in root epidermal cell expansion.  
393 *Planta* 203:289–94
- 394 Feng H., Liu C., Fu R., Zhang M., Li H., Shen L., Wei Q., Sun X., Xu L., Ni B., and Li C. (2019).  
395 LORELEI-LIKE GPI-ANCHORED PROTEINS 2/3 regulate pollen tube growth as chaperones and  
396 coreceptors for ANXUR/BUPS receptor kinases in *Arabidopsis*. *Mol. Plant.*  
397 [doi.org/10.1016/j.molp.2019.09.004](https://doi.org/10.1016/j.molp.2019.09.004).
- 398 Ge Z., Zhao Y., Liu M-Ch, Zhou L-Z, Wang, L., Zhong S., Hou, S., Jiang, J., Liu, T., Huang, Q., Xiao, J.,  
399 Gu, H., Wu H-M, Dong J., Dresselhaus T., Cheung A.Y., Qu L-J. (2019) LLG2/3 are co-receptors  
400 in BUPS/ANX-RALF signaling to regulate Arabidopsis pollen tube Integrity. *Current Biology* 29,  
401 1–10.
- 402 Guan Y, Nothnagel EA (2004) Binding of arabinogalactan proteins by Yariv phenylglycoside trig-  
403 gers wound-like responses in *Arabidopsis* cell cultures. *Plant Physiol* 135:1346–136
- 404 Hacham Y, Holland N, Butterfield C, Ubeda-Tomas S, Bennett MJ, Chory J, Savaldi-Goldstein S.  
405 (2011). Brassinosteroid perception in the epidermis controls root meristem size. *Development*  
406 (*Cambridge, England*) 138:839–848. doi: 10.1242/dev.061804.
- 407 Hothorn M, Belkhadir Y, Dreux M, Dabi T, Noel JP, Wilson IA, Chory J. (2011). Structural basis of  
408 steroid hormone perception by the receptor kinase BRI1. *Nature* 474:467–471. doi:  
409 [10.1038/nature10153](https://doi.org/10.1038/nature10153).
- 410 Hutten SJ, Hamers DS, Aan den Toorn M, van Esse W, Nolles A, BuÈcherl CA, et al. (2017) Visuali-  
411 zation of BRI1 and SERK3/BAK1 nanoclusters in *Arabidopsis* roots. *PLoS ONE* 12(1):  
412 e0169905.doi:10.1371/journal.pone.01699056
- 413 Kitazawa K, Tryfona T, Yoshimi Y, et al. (2013).  $\beta$ -Galactosyl Yariv Reagent Binds to the  $\beta$ -1,3-  
414 Galactan of Arabinogalactan Proteins. *Plant Physiology* 161(3): 1117-1126.  
415 doi:10.1104/pp.112.211722.
- 416 Kuppusamy KT, Chen AY, Nemhauser JL. (2009). Steroids are required for epidermal cell fate es-  
417 tablishment in Arabidopsis roots. *Proceedings of the National Academy of Sciences of the*  
418 *United States of America* 106: 8073–8076. doi: 10.1073/pnas.0811633106.
- 419 Li J, Chory J. (1997). A putative leucine-rich repeat receptor kinase involved in brassinosteroid  
420 signal transduction. *Cell* 90:929–938. doi: 10.1016/S0092-8674(00)80357-8
- 421 Li J, Nam KH (2002) Regulation of brassinosteroid signaling by a GSK3/SHAGGY-like kinase. *Sci-*  
422 *ence* 295(5558):1299–1301
- 423 Li, C., Wu, H.-M., and Cheung, A.Y. (2016). FERONIA and her pals: functions and mechanisms.  
424 *Plant Physiol.* 171, 2379–2392.
- 425 Li, C., Yeh, F.L., Cheung, A.Y., Duan, Q., Kita, D., Liu, M.C., Maman, J., Luu, E.J., Wu, B.W., Gates,  
426 L., et al. (2015). Glycosylphosphatidylinositol anchored proteins as chaperones and co-  
427 receptors for FERONIA receptor kinase signaling in Arabidopsis. *eLife* 4, e06587

- 428 Liang, Y., Basu, D., Pattathil, S., Xu, W.-L., Venetos, A., Martin, S.L., et al. (2013). Biochemical and  
429 physiological characterization of fut4 and fut6 mutants defective in arabinogalactan-protein  
430 fucosylation in *Arabidopsis*. *J. Exp. Bot.* 64, 5537–5551. doi:10.1093/jxb/ert321
- 431 Lin X. (2004). Functions of heparan sulfate proteoglycans in cell signaling during development.  
432 *Development* 131 (24): 6009–6021.
- 433 Lin, Q., Ohashi, Y., Kato, M., Tsuge, T., Gu, H., Qu, L.J., and Aoyama, T. (2015). GLABRA2 directly  
434 suppresses basic helix-loop-helix transcription factor genes with diverse functions in root hair  
435 development. *Plant Cell* 27: 2894–2906
- 436 Liu, X., Castro, C., Wang, Y., Noble, J., Ponvert, N., Bundy, M., Hoel, C., Shpak, E., and Palanivelu,  
437 R. (2016). The role of LORELEI in pollen tube reception at the interface of the synergid cell and  
438 pollen tube requires the modified eight-cysteine motif and the receptor-like kinase FERONIA.  
439 *Plant Cell* 28, 1035–1052.
- 440 Ma Y, Zeng W, Bacic A, Johnson K (2018). AGPs through time and space. *Annual Plant Reviews* 1,  
441 1–38.
- 442 Majamaa K, Gunzler V, Hanauske-Abel HM, Myllyla R, Kivirikko KI (1986) Partial identity of the 2-  
443 oxoglutarate and ascorbate binding sites of prolyl 4-hydroxylase. *J Biol Chem* 261: 7819–7823
- 444 Masucci JD, Schiefelbein JW. (1994). The *rhd6* mutation of *Arabidopsis thaliana* alters root-hair  
445 initiation through an auxin- and ethylene-associated process. *Plant Physiology* 106:1335–  
446 1346. doi: 10.1104/pp.106.4.1335.
- 447 Masucci JD, Schiefelbein JW. (1996). Hormones act downstream of *TTG* and *GL2* to promote root  
448 hair outgrowth during epidermis development in the *Arabidopsis* root. *The Plant Cell* 8:1505–  
449 1517. doi: 10.1105/tpc.8.9.1505.
- 450 Motose, H. et al. (2004) A proteoglycan mediates inductive interaction during plant vascular de-  
451 velopment. *Nature* 429, 873–878
- 452 Ogawa-Ohnishi, M., Matsubayashi, Y. (2015). Identification of three potent hydroxyproline O-  
453 galactosyltransferases in *Arabidopsis*. *Plant J.* 81, 736–746. doi: 10.1111/tpj.12764
- 454 Pereira, A.M., Pereira, L.G., and Coimbra, S. (2015). Arabinogalactan proteins: rising attention  
455 from plant biologists. *Plant Reprod.* 28, 1–15.
- 456 Ryu KH, Kang YH, Park YH, Hwang I, Schiefelbein J, Lee MM. (2005). The WEREWOLF MYB protein  
457 directly regulates *CAPRICE* transcription during cell fate specification in the *Arabidopsis* root  
458 epidermis. *Development (Cambridge, England)* 132:4765–4775. doi: 10.1242/dev.02055.
- 459 Sardar HS, Yang J, Showalter AM (2006) Molecular interactions of arabinogalactan proteins with  
460 cortical microtubules and F-actin in Bright Yellow-2 tobacco cultured cells. *Plant Physiol* 142:  
461 1469–1479
- 462 Savaldi-Goldstein S, Peto C, Chory J. (2007). The epidermis both drives and restricts plant shoot  
463 growth. *Nature* 446:199–202. doi: 10.1038/nature05618
- 464 Schiefelbein, J., Huang, L. and Zheng, X. (2014). Regulation of epidermal cell fate in *Arabidopsis*  
465 roots: the importance of multiple feedback loops. *Front. Plant Sci.* 5, 47
- 466 Schultz CJ, Ferguson KL, Lahnstein J, Bacic A (2004) Post-translational modifications of  
467 arabinogalactan-peptides of *Arabidopsis thaliana*: endoplasmic reticulum and  
468 glycosylphosphatidylinositol-anchor signal cleavage sites and hydroxylation of proline. *J Biol*  
469 *Chem* 279: 45503–45511
- 470 Seifert, G.J. and Roberts, K. (2007). The biology of arabinogalactan proteins. *Annual Review of*  
471 *Plant Biology* 58: 137–161
- 472 She J, Han Z, Kim TW, Wang J, Cheng W, Chang J, Shi S, Wang J, Yang M, Wang ZY, Chai J. (2011).  
473 Structural insight into brassinosteroid perception by BRI1. *Nature* 474:472–476. doi:  
474 10.1038/nature10178

- 475 Song SK, Ryu KH, Kang YH, Song JH, Cho YH, Yoo SD, Schiefelbein J, Lee MM. (2011). Cell fate in  
476 the Arabidopsis root epidermis is determined by competition between WEREWOLF and CA-  
477 PRICE. *Plant Physiology* 157:1196–1208. doi: 10.1104/pp.111.185785.
- 478 Sun, Y., Fan, X.Y., Cao, D.M., Tang, W., He, K., Zhu, J.Y., He, J.X., Bai, M.Y., Zhu, S., Oh, E., et al.  
479 (2010). Integration of brassinosteroid signal transduction with the transcription network for  
480 plant growth regulation in Arabidopsis. *Dev. Cell* 19, 765–777
- 481 Tan, L., Showalter, A.M., Egelund, J., Hernandez-Sanchez, A., Doblin M.S., and Bacic, A. (2012).  
482 Arabinogalactan-proteins and the research challenges for these enigmatic plant cell surface  
483 proteoglycans. *Front. Plant Sci.* 3: 140
- 484 Tan, L., Qiu, F., Lampert, D.T.A., and Kieliszewski, M.J. (2004). Structure of a hydroxyproline  
485 (Hyp)-arabinogalactan polysaccharide from repetitive Ala-Hyp expressed in transgenic  
486 *Nicotiana tabacum*. *J. Biol. Chem.* 279: 13156–13165
- 487 Tryfona, T., Theys, T.E., Wagner, T., Stott, K., Keegstra, K., Dupree, P. (2014). Characterisation of  
488 FUT4 and FUT6  $\alpha$ -(1→2)-fucosyltransferases reveals that absence of root arabinogalactan  
489 fucosylation increases *Arabidopsis* root growth salt sensitivity. *PLoS ONE* 9:e93291.  
490 doi:10.1371/journal.pone.0093291
- 491 Van Hengel AJ, Barber C, Roberts K. (2004). The expression patterns of arabinogalactan-protein  
492 *AtAGP30* and *GLABRA2* reveal a role for abscisic acid in the early stages of root epidermal  
493 patterning. *The Plant Journal: for Cell and Molecular Biology* 39:70–83. doi: 10.1111/j.1365-  
494 313X.2004.02104.x.
- 495 Velasquez, S.M., Ricardi, M.M., Dorosz, J.G., Fernandez, P.V., Nadra, A.D., Pol-Fachin, L., Egelund,  
496 J., Gille, S., Ciancia, M., Verli, H., et al. (2011). O-glycosylated cell wall extensins are essential  
497 in root hair growth. *Science* 332:1401–1403.
- 498 Velasquez, SM, Ricardi MM, Poulsen CP, Oikawa A, Dilokpimol A, Halim A, et al. (2015a). Com-  
499 plex regulation of prolyl-4-hydroxylases impacts root hair expansion. *Mol Plant.* 8:734–46.
- 500 Velasquez, S.M., Marzol, E., Borassi, C., Pol-Fachin, L., Ricardi, M.M., Mangano, S., et al. (2015b).  
501 Low sugar is not always good: Impact of specific O-glycan defects on tip growth in *Arabidop-*  
502 *sis*. *Plant Physiol.* 168, 808–813. doi: 10.1104/pp.114.255521
- 503 Wang L, Li H, Lv X, Chen T, Li R, Xue Y, et al. Spatiotemporal Dynamics of the BRI1 Receptor and  
504 its Regulation by Membrane Microdomains in Living Arabidopsis Cells. *Mol Plant.* 2015;  
505 8(9):1334-1349
- 506 Willats W.G. and Knox, J.P. (1996). A role for arabinogalactan-proteins in plant cell expansion:  
507 evidence from studies on the interaction of  $\beta$ -glucosyl Yariv reagent with seedlings of *Ara-*  
508 *bidopsis thaliana*. *Plant J.* 9:919–25
- 509 Xu, J., Tan, L., Lampert, D.T.A., Showalter, A.M., and Kieliszewski, M.J. (2008). The O-Hyp glyco-  
510 sylation code in tobacco and Arabidopsis and a proposed role of Hyp-glycans in secretion.  
511 *Phytochemistry* 69: 1631–1640
- 512 Xue H., Veit, C., Abas, L., Tryfona, T., Maresch, D., Ricardi, M.M., Estevez, J.M., Strasser R., Seifert  
513 G.J. (2017). *Arabidopsis thaliana* FLA4 functions as a glycan-stabilized soluble factor via its  
514 carboxy proximal Fasciclin 1 domain. *Plant J.* 10.1111/tpj.13591
- 515 Yan Z, Zhao J, Peng P, Chihara RK, Li J. (2009). BIN2 functions redundantly with other Arabidopsis  
516 GSK3-like kinases to regulate brassinosteroid signaling. *Plant Physiology* 150:710–721. doi:  
517 10.1104/pp.109.138099
- 518 Yang CJ, Zhang C, Lu YN, Jin JQ, Wang XL. (2011). The mechanisms of brassinosteroids' action:  
519 from signal transduction to plant development. *Molecular Plant* 4:588–600. doi:  
520 10.1093/mp/ssr020

- 521 Yariv J, Lis H, Katchalski E (1967) Precipitation of arabic acid and some seed polysaccharides by  
522 glycosylphenylazo dyes. *Biochem J* 105(1):1C–2C
- 523 Yi, K., Menand, B., Bell, E., and Dolan, L. (2010). A basic helix-loop-helix transcription factor con-  
524 trols cell growth and size in root hairs. *Nat. Genet.* 42, 264–267. doi: 10.1038/ng.529
- 525 Zavaliev R., Dong, X., Epel B.L. (2016) Glycosylphosphatidylinositol (GPI) modification serves as a  
526 primary plasmodesmal targeting signal. *Plant Physiology.* 172(2): 1061-1073

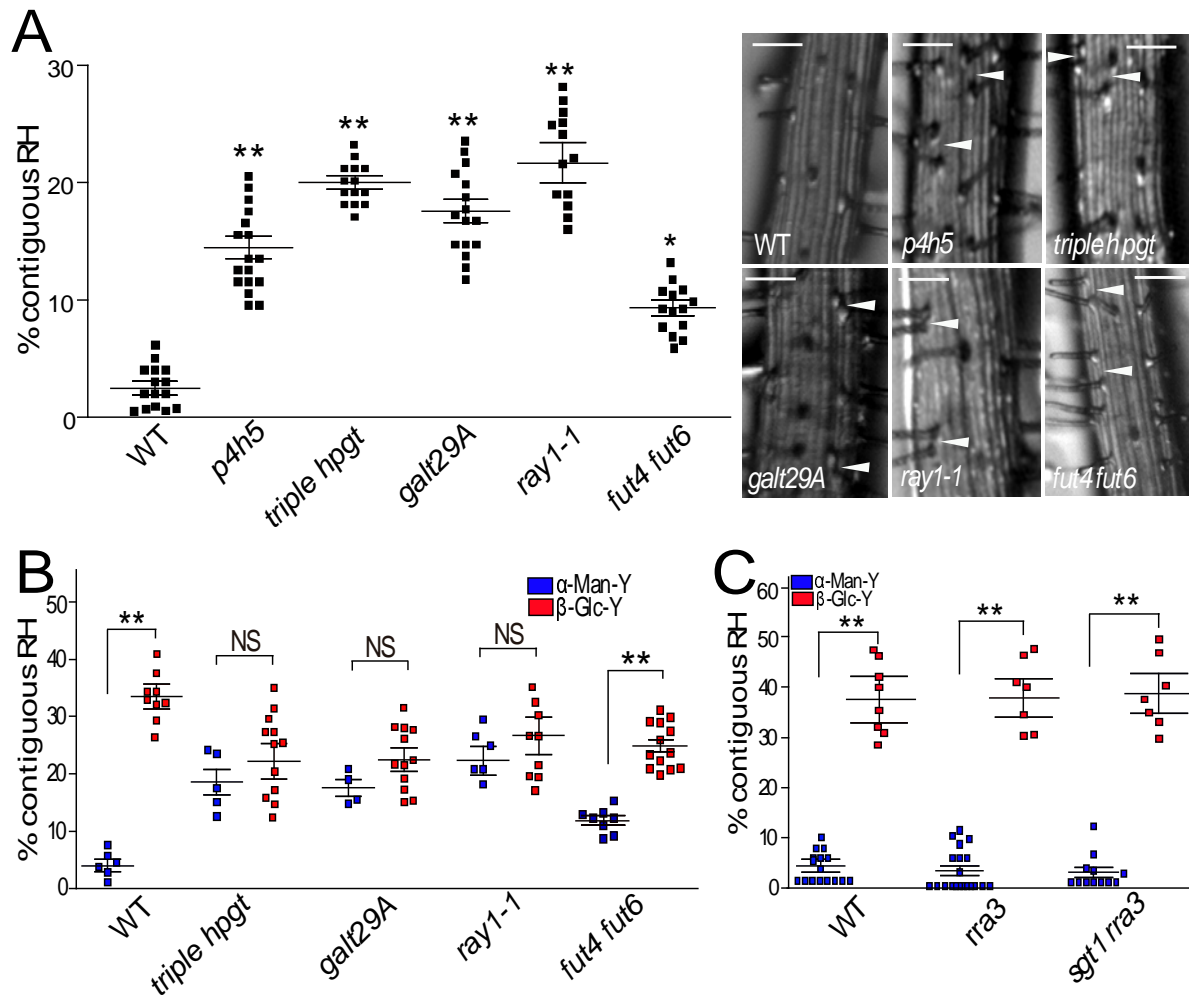

527

528

529 **Figure 1. Contiguous RH phenotype in O-underglycosylated AGPs phenocopy BR mutants.**

530 (A) RH phenotype in the *p4h5* mutant and in four glycosyltransferase mutants (*triple hpgt*, *ray1*,  
531 *galt29A*, and *fut4 fut6*) that act specifically on AGP O-glycosylation. Right, selected pictures.  
532 Arrowheads indicated two contiguous RHs. Scale bar= 50  $\mu$ m.

533 (B) RH phenotype in three glycosyltransferase mutants (*triple hpgt*, *ray1*, *galt29A* and *fut4 fut6*)  
534 that act specifically on AGP O-glycosylation. Effect on contiguous RH phenotype in roots treated  
535 with 5 $\mu$ M  $\alpha$ -Mannosyl Yariv ( $\alpha$ -Man-Y) or 5 $\mu$ M  $\beta$ -Glucosyl Yariv ( $\beta$ -Glc-Y).

536 (C) RH phenotype in two glycosyltransferase mutants (*rra3* and *rra3 sgt1*) that act specifically on  
537 EXT O-glycosylation. Effect on contiguous RH phenotype in roots treated with 5 $\mu$ M  $\alpha$ -Mannosyl  
538 Yariv ( $\alpha$ -Man-Y) or  $\beta$ -Glucosyl Yariv ( $\beta$ -Glc-Y).

539 (A-C) P-value of one-way ANOVA, (\*\*) P<0.001, (\*) P<0.01. NS= not significant different. Error  
540 bars indicate  $\pm$ SD from biological replicates.

541 See also Figure S1 and Supplementary Item 1.

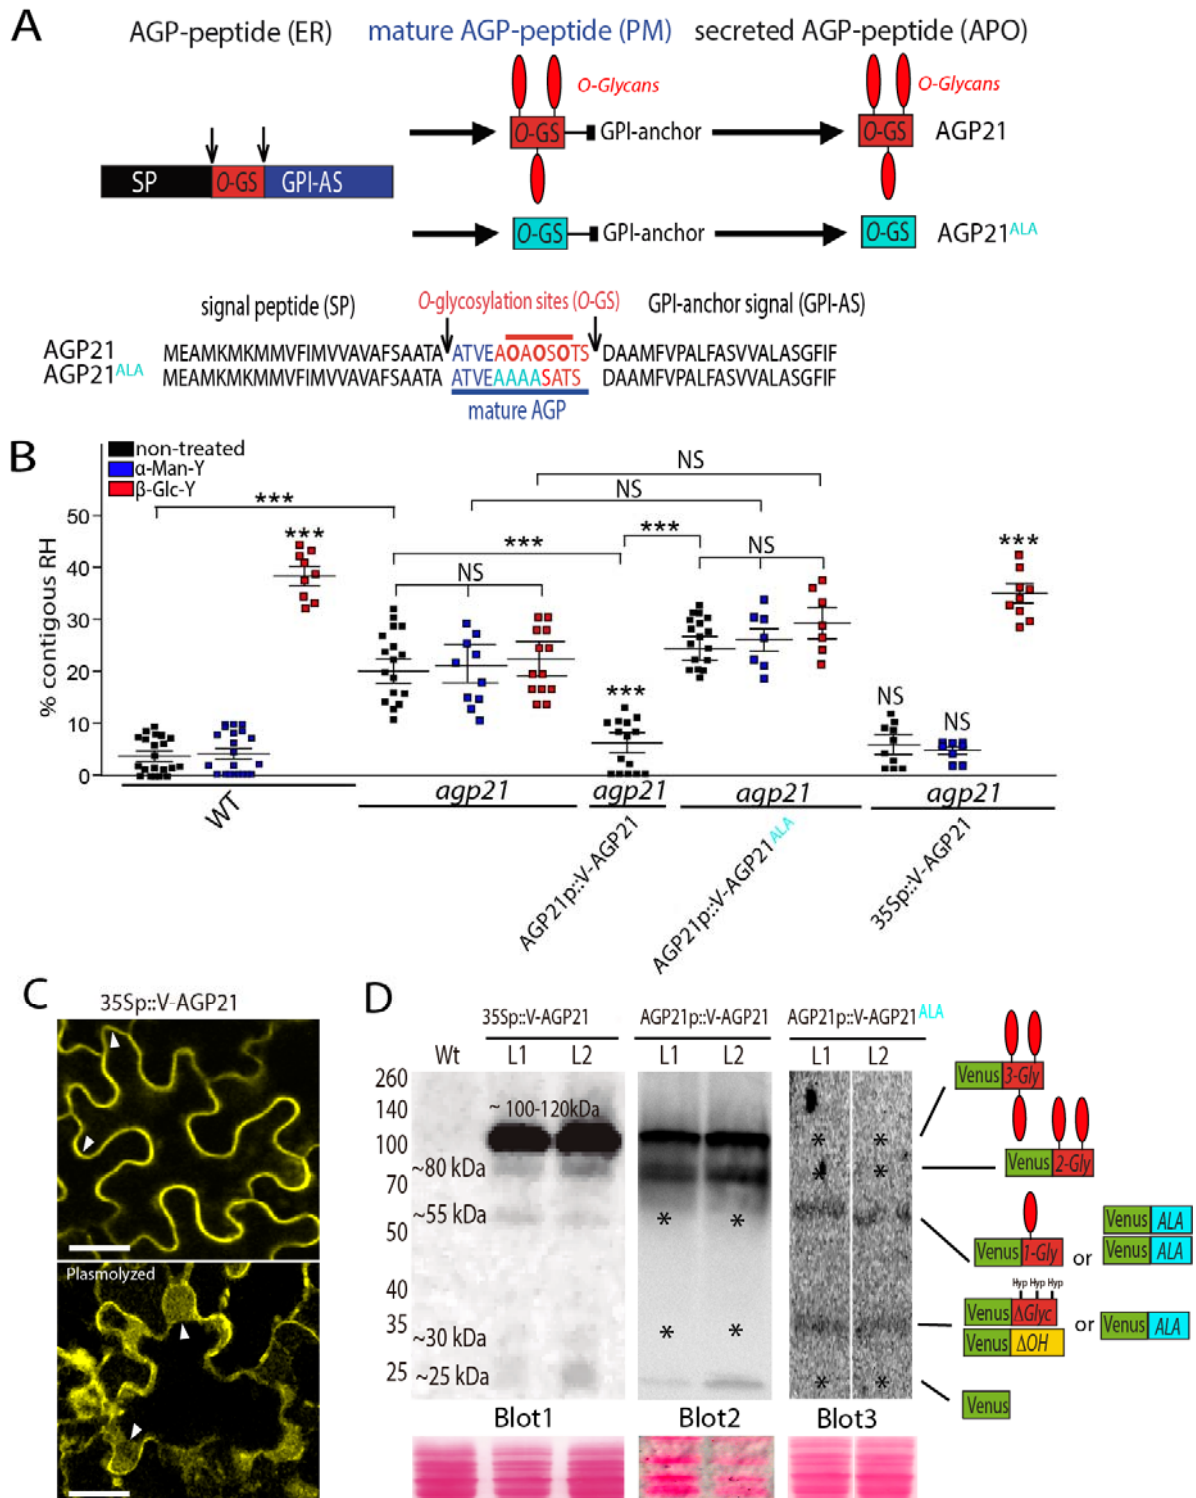

542  
543

544 **Figure 2. O-glycosylated AGP21 peptide at the cell surface modulates RH cell fate.**

545 (A) Identified AGP21 peptide acting on root epidermis development. AGP21 peptide sequence  
546 and its posttranslational modifications carried out in the secretory pathway. The mature AGP21  
547 peptide contains only 10-13 aa in length. APO= Apoplast. ER=Endoplasmic Reticulum. GPI  
548 anchor= GlycosylPhosphatidylinositol (GPI) anchor. PM=Plasma membrane.



549 (B) Contiguous RH phenotype in *agp21*, complemented *agp21* mutant with AGP21p::V-AGP21  
550 and with 35Sp::V-AGP21 constructs as well as AGP21p::V-AGP21<sup>ALA</sup> expression in *agp21*. Only  
551 one line is shown. *P*-value of one-way ANOVA, (\*\*) *P*<0.001, (\*) *P*<0.01. NS= not significant  
552 differences. Error bars indicate ±SD from biological replicates.

553 (C) Subcellular localization of 35Sp::V-AGP21 transiently expressed in *Nicotiana benthamiana* (on  
554 the left) or in *Arabidopsis thaliana* (on the right). Plasmolysis (P+) induced with a Mannitol (800  
555 mM) treatment (bottom pictures) showed a secretion outside the plasma membrane and in the  
556 plasma membrane of AGP21 in *N. benthamiana* or only plasma membrane AGP21 localization in  
557 *A. thaliana*. Arrowheads indicate plasma membrane located AGP21. Scale bar= 50 μm.

558 (D) Immunoblot analysis of two stable lines expressing 35Sp::V-AGP21 (L1-L2) and two lines  
559 expressing AGP21p::V-AGP21 (L1-L2) and two lines expressing AGP21p::V-AGP21<sup>ALA</sup> (L1-L2). Each  
560 blot is an independent experiment. Putative Venus-AGP21 structures are indicated on the right.  
561 *O*-glycans are indicated as red elongated balloons. ΔOH = non-hydroxylated. ΔGly = without *O*-  
562 glycans. 1-Gly to 3-Gly = 1 to 3 sites with Hyp-*O*-glycosylation. Asterisk indicates missing AGP21  
563 glycoforms or lack of Venus protein.

564 See also Figure S2 and Supplementary Items 2-5.

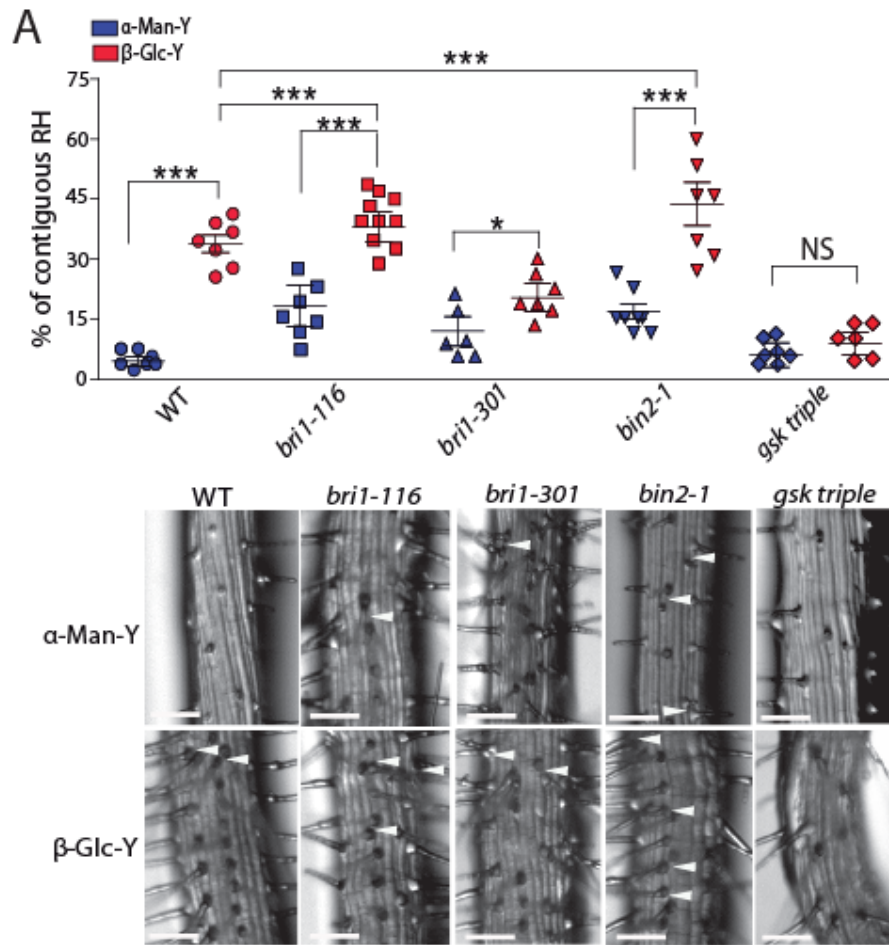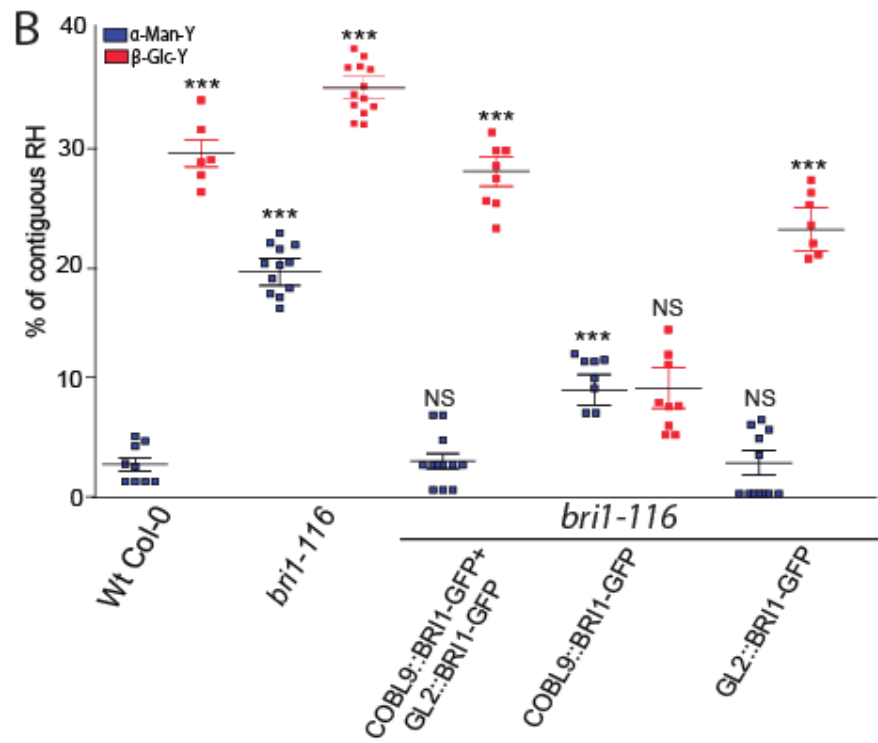

566 **Figure 3. Perturbation of AGPs requires active BRI1 expression in atrichoblast cells and**  
567 **downstream BIN2-BIL1-2 proteins to triggers changes in RH cell fate.**

568 (A) Contiguous RH phenotype in roots treated with 5 $\mu$ M  $\beta$ -Glucosyl Yariv ( $\beta$ -Glc-Y) or 5 $\mu$ M  $\alpha$ -  
569 Mannosyl Yariv ( $\alpha$ -Man-Y). Scale bar= 20  $\mu$ m. *P*-value of one-way ANOVA, (\*\*\*) *P*<0.001, (\*)  
570 *P*<0.05. NS= not significant differences. Error bars indicate  $\pm$ SD from biological replicates.  
571 Arrowheads indicated two contiguous RHs.

572 (B) Effect of the BRI1 differential expression on the development of contiguous RH. BRI1 is active  
573 when expressed in atrichoblast cells (under GL2 promoter).

574 See also Figure S3.

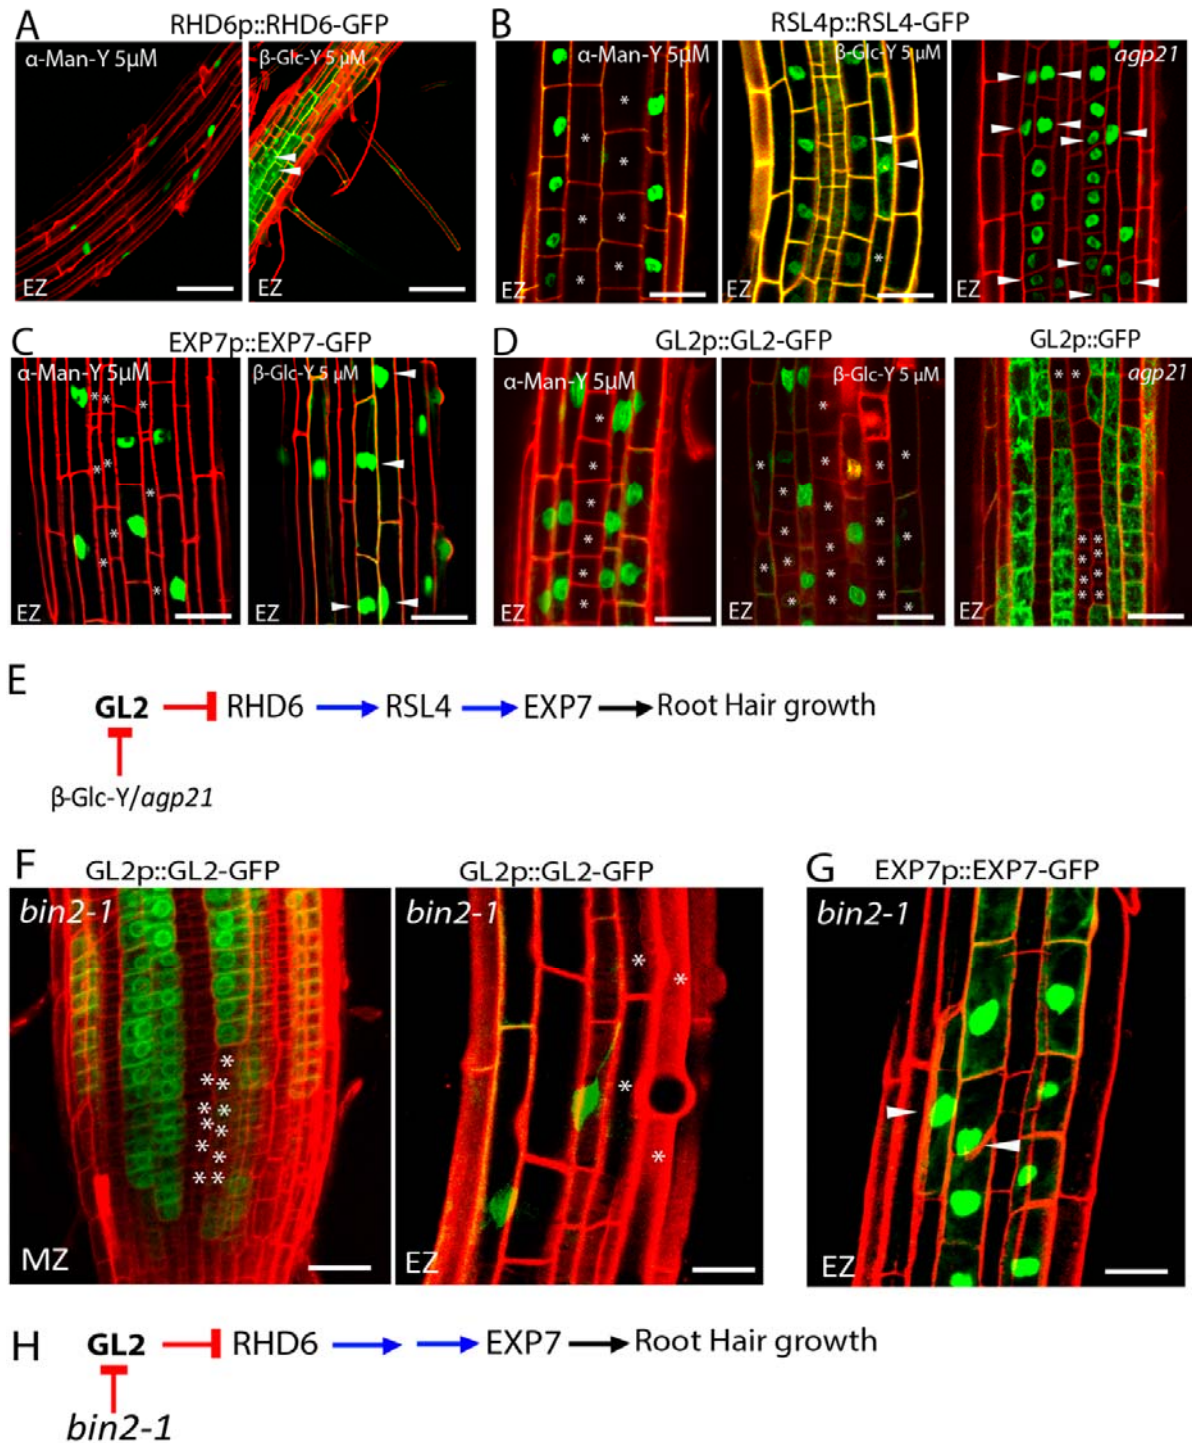

575

576

577 **Figure 4. AGPs disruption, the lack of AGP21, and *bin2-1* block the RH repressor GLABRA2**  
 578 **(GL2) and triggers RHD6-RSL4-EXP7 expression in some atrichoblast cells.**

579 The effect of β-Glucosyl Yariv (β-Glc-Y), α-Mannosyl Yariv (α-Man-Y), and the absence of AGP21  
 580 peptide were monitored on several markers to study epidermis cell fate.

581 (A) RHD6 (RHD6p::RHD6-GFP) as an early RH marker.

582 (B) A downstream RHD6 factor RSL4 (RSL4p::RSL4-GFP).

583 (C) The RSL4-gene target EXP7 (EXP7p::EXP7-GFP).  
584 (D) The main RH repressor GL2 (GL2p::GL2-GFP). (A-D) Arrowheads indicate expression of a  
585 given marker in two contiguous epidermis cell lines. Asterisks indicate absence of expression.  
586 Scale bar= 20  $\mu$ m.  
587 (E) Proposed sequence of events triggered by  $\beta$ -Glucosyl Yariv ( $\beta$ -Glc-Y) or the lack of AGP21  
588 peptide that leads to abnormal RH development.  
589 (F) GL2 expression in the *bin2-1* background in the Meristematic Zone (MZ) and Elongation Zone  
590 (EZ) of the root.  
591 (G) The RH marker EXP7 expression in the *bin2-1* background in the Elongation Zone (EZ) of the  
592 root. (F-G) Arrowheads indicate expression of a given marker in two contiguous epidermal cell  
593 lines. Asterisks indicated absence of expression. Scale bar= 10  $\mu$ m.  
594 (H) Proposed sequence of events triggered by *bin2-1* that leads to abnormal RH development.  
595 See also Figure S4.

1 **Cell surface *O*-glycosylated AGP21 peptide acts on the Brassinosteroids pathway to modulate**  
2 **root hair cell fate**

3

4 Cecilia Borassi<sup>1,#</sup>, Javier Gloazzo Dorosz<sup>1,#</sup>, Martiniano M. Ricardi<sup>2,#,\*</sup>, Laercio Pol Fachin<sup>3</sup>, Mariana  
5 Carignani Sardoy<sup>1</sup>, Eliana Marzol<sup>1</sup>, Silvina Mangano<sup>1</sup>, Diana Rosa Rodríguez García<sup>1</sup>, Javier  
6 Martínez Pacheco<sup>1</sup>, Yossmayer del Carmen Rondón Guerrero<sup>1</sup>, Silvia M. Velasquez<sup>1,\*\*</sup>, Bianca  
7 Villavicencio<sup>4</sup>, Marina Ciancia<sup>5</sup>, Georg Seifert<sup>6</sup>, Hugo Verli<sup>4</sup> & José M. Estevez<sup>1,7,+</sup>

8

9 **Supplemental Information**

10 Supplemental Figures S1-S4

11 Material and Methods

12 Supplementary Items Tables S1-S4

13 Supplementary Items Figures S1-S5

14 Supplementary References

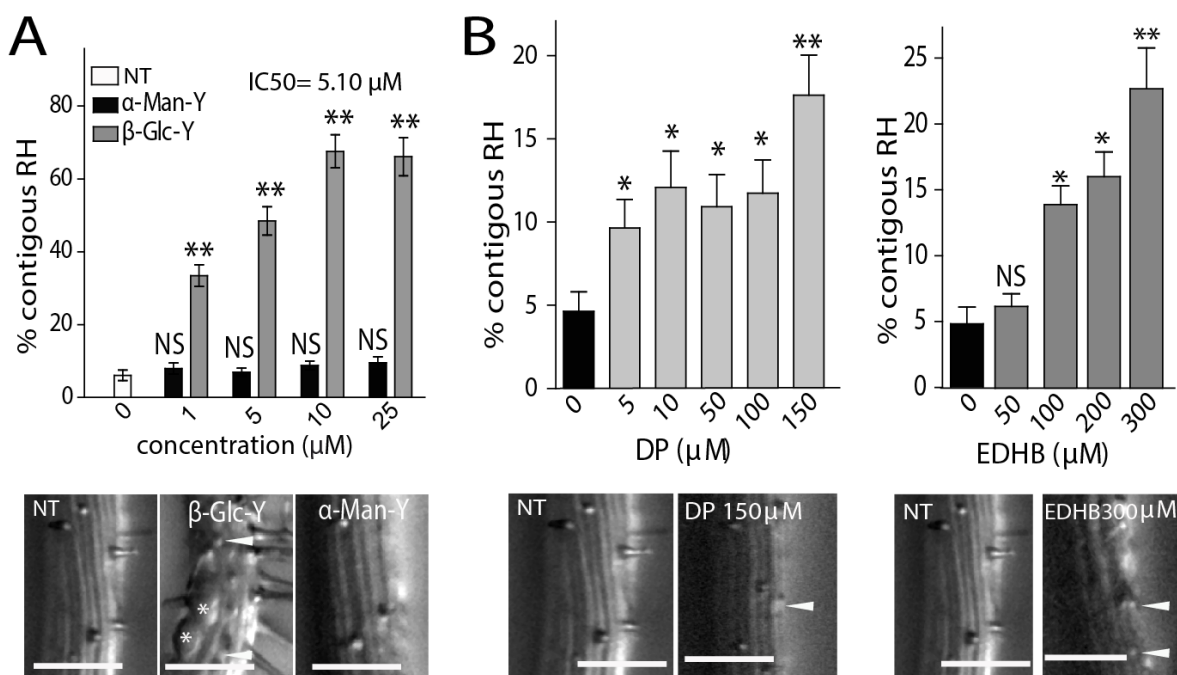

**C** AGP21p::Venus-AGP21

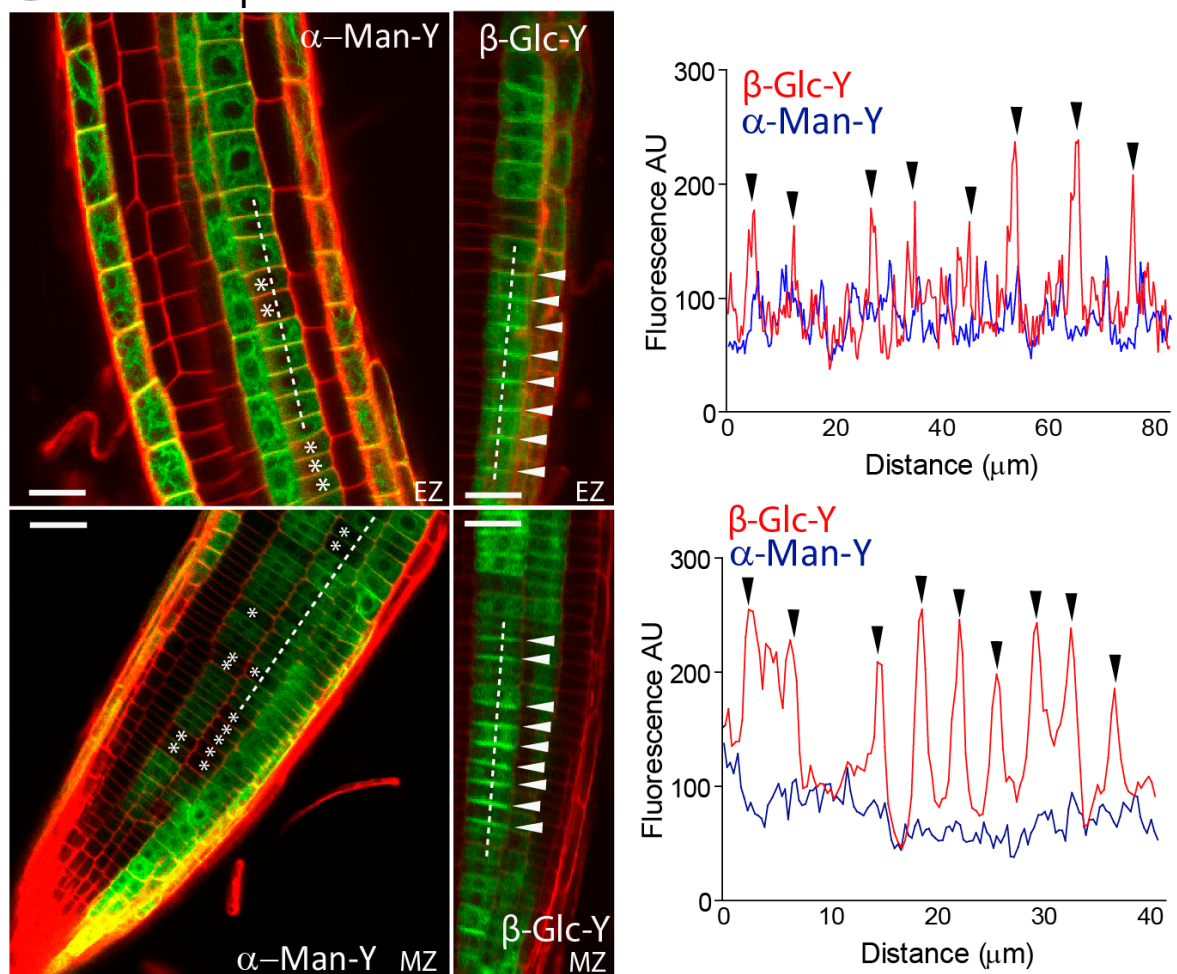

16 **Figure S1. Perturbation of *O*-glycosylated AGPs affect RH cell fate program.  $\beta$ -Glc-Y is able to**  
17 **trigger an over-accumulation of AGP21 peptide in the cell surface.**

18 (A) Contiguous RH phenotype developed under pharmacological of AGPs. Pictures below each  
19 graph indicate the RH phenotype in detail. Arrowheads indicate two contiguous RH cell  
20 protuberances. Asterisk indicated bulging cells. Roots treated with  $\beta$ -Glucosyl Yariv ( $\beta$ -Glc-Y) or  
21 with  $\alpha$ -Mannosyl Yariv ( $\alpha$ -Man-Y) as control. NT= non-treated.

22 (B) Contiguous RH phenotype developed under pharmacological disruption of peptidyl-proline.  
23 Roots treated with two distinct P4H inhibitors,  $\alpha,\alpha$ -dipyridyl (DP) and ethyl-3,4-  
24 dihydroxybenzoate (EDHB). Pictures below each graph indicate the RH phenotype. Arrowheads  
25 indicate two contiguous RH cell protuberances. Asterisk indicated bulging cells. Scale bar= 50  
26  $\mu$ m.

27 (C) AGP21 is expressed in some but not all trichoblast and atrichoblast cells with a discontinuous  
28 pattern (asterisk) in the meristematic zone (MZ) and elongation root zones (EZ). Some root  
29 epidermal cell layer lack AGP21 (line). On the left, the effect of  $\beta$ -Glucosyl Yariv ( $\beta$ -Glc-Y) on the  
30 accumulation of AGP21p::V-AGP21 on root epidermal cells. Arrowheads indicate cell surface  
31 AGP21 peptide over-accumulation in transversal walls in the treated roots with  $\beta$ -Glc-Y. Scale  
32 bars= 10  $\mu$ m. Plot profiles (dashed lines) indicates the accumulation of AGP21p::V-AGP21 (black  
33 arrowheads) when roots are treated with  $\beta$ -Glc-Y.



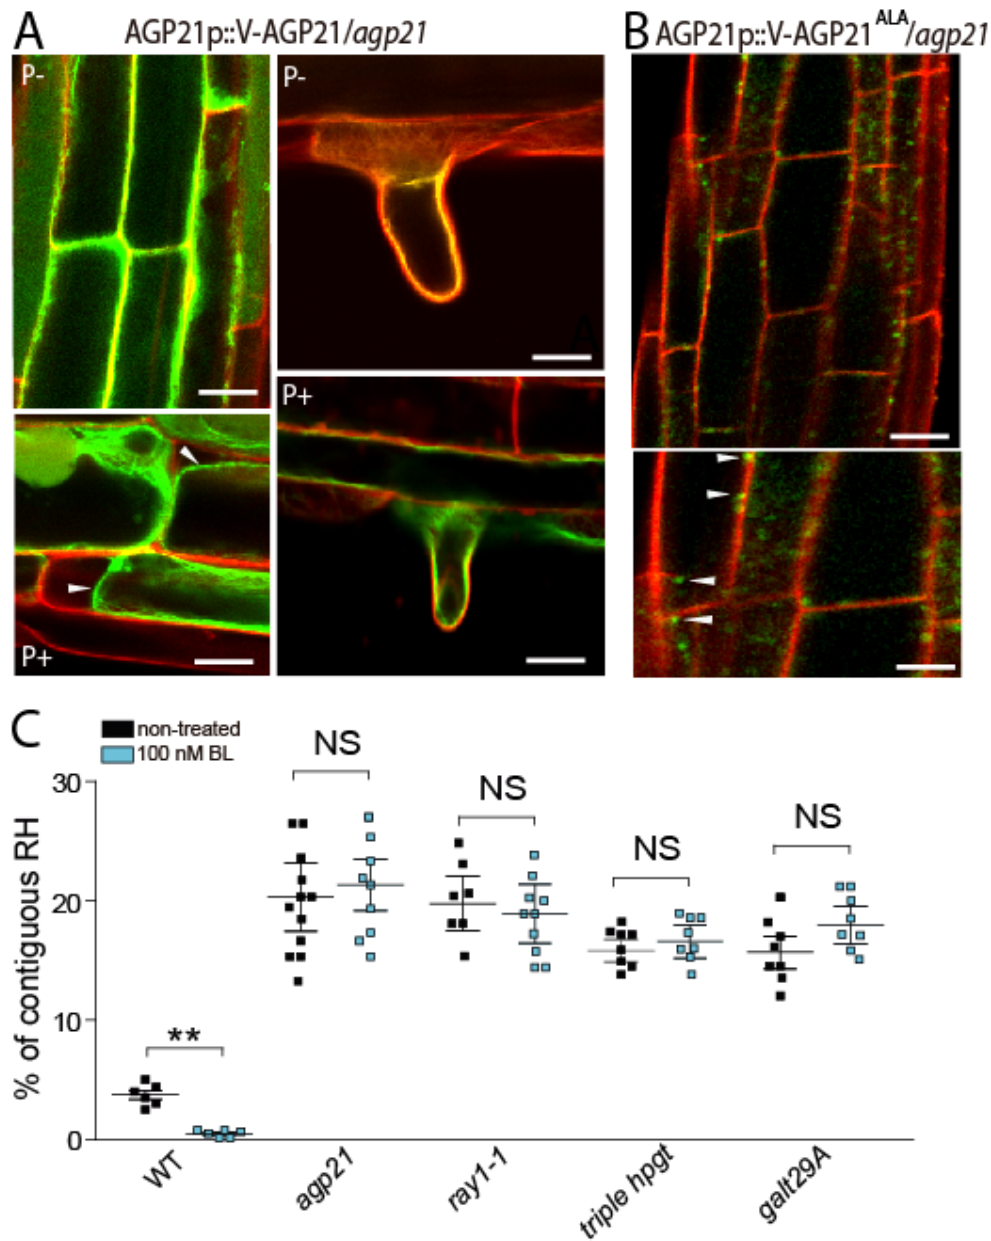

34

35

36 **Figure S2. AGP21 expression at the cell surface in epidermis and RH cells. Perception of BR in**  
37 **epidermal cells is abolished in the *agp21* and related under-*O*-glycosylated AGP mutants.**

38 (A) Expression of AGP21p::V-AGP21 at the plasma membrane in non-plasmolyzed (P-) and  
39 plasmolyzed (P+) epidermal cells (on the right) and RHs (on the left) with 800 mM Mannitol.  
40 Arrowheads indicate retraction of plasma membrane. Scale bar= 10  $\mu$ m.

41 (B) Expression of AGP21p::V-AGP21<sup>ALA</sup>. This version of AGP21 peptide accumulates as  
42 intracellular dots. Scale bar= 10  $\mu$ m.

43 (C) Contiguous RH phenotype in WT Col-0, *agp21*, *ray1-1*, *triple hpgt* and *galt29A* in non-treated  
44 and treated roots with 100nM BL. *P*-value of one-way ANOVA, (\*\*) *P*<0.001. NS= not significant  
45 different. Error bars indicate  $\pm$ SD from biological replicates.

46

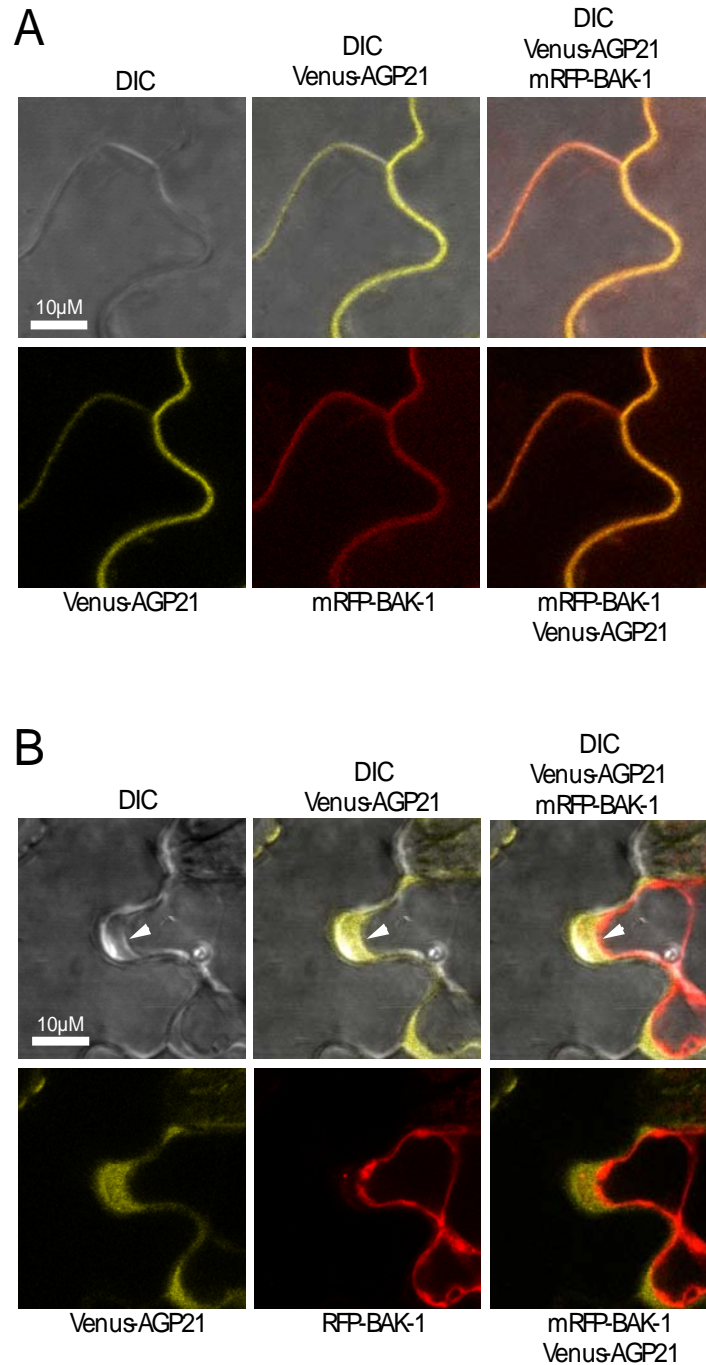

47

48 **Figure S3. AGP21 partially co-localizes with BAK1 protein in epidermal cells.**

49 (A) Co-localization of AGP21-Venus with BAK1-mRFP at the plasma membrane of epidermal cells  
50 in *Nicotiana Benthamiana*. Scale bar= 10 μm. Cross section of expression levels across BAK1-  
51 RFP coexpressed with AGP21-Venus.

52 (B) Plasmolysis was induced with 800 mM Mannitol uncovering an apoplastic plus plasma  
53 membrane AGP21 localization. Scale bar= 10 μm.

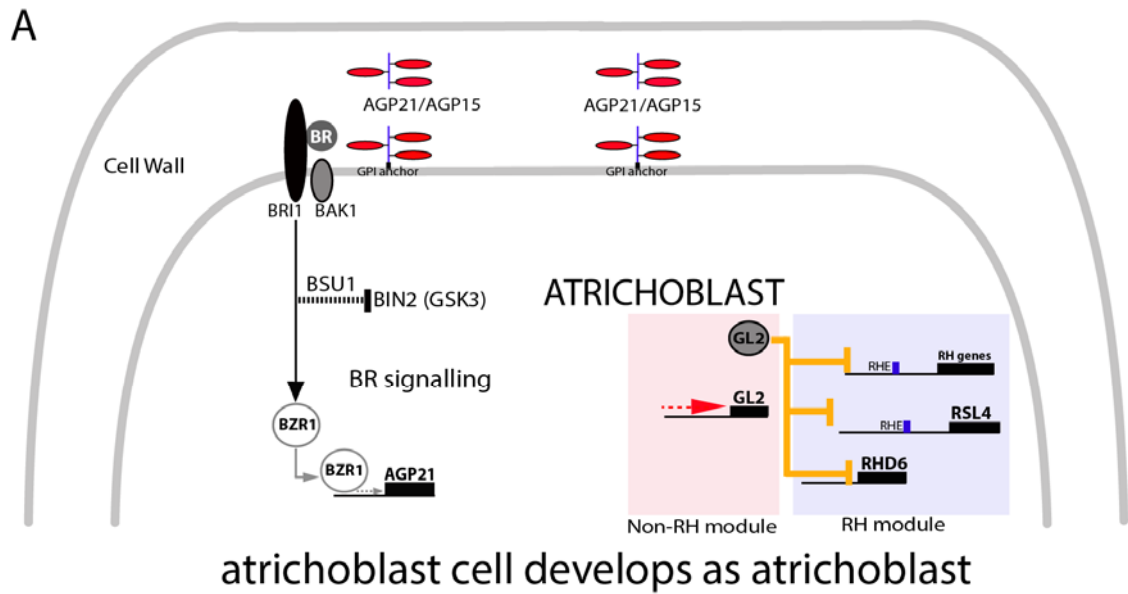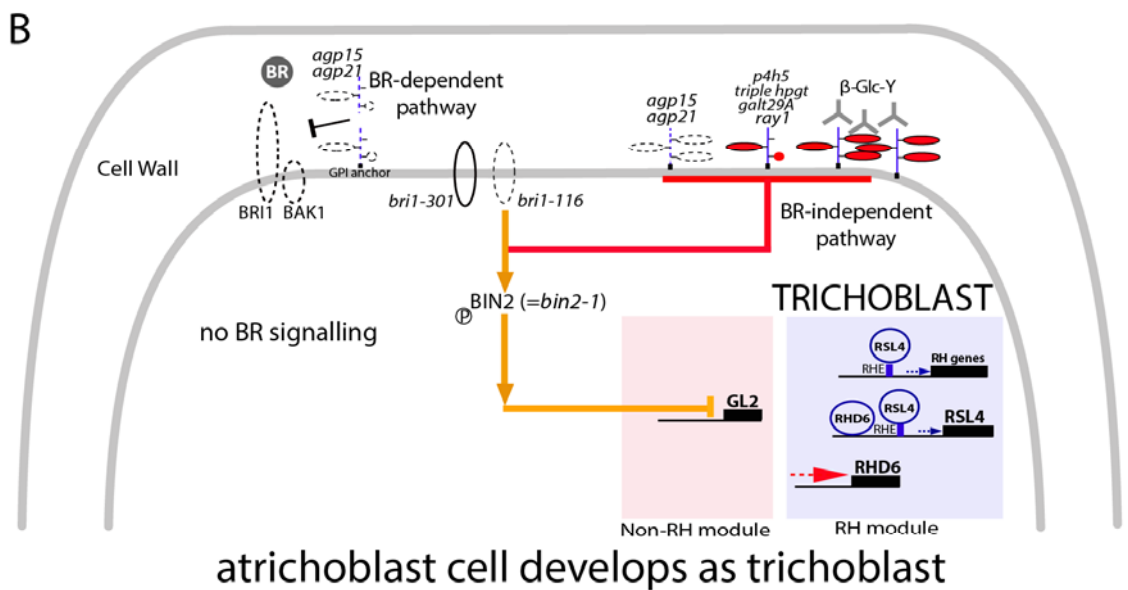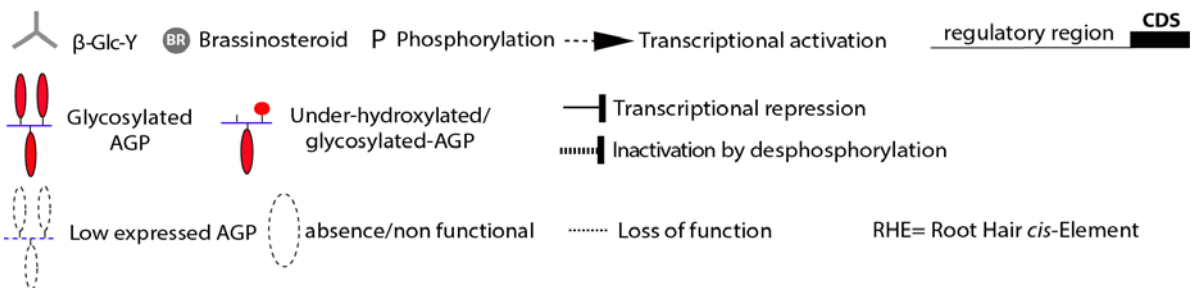

54

55

56 **Figure S4. AGP21 influences BR perception in the root epidermis to control RH cell fate in a**  
 57 **BIN2-dependent manner.**

58 (A) Under normal BR-signaling. Model of BR-BRI1-BAK1 pathway modulation by plasma  
 59 membrane O-glycosylated AGP21. BR-signalling controls RH cell fate by inhibiting

60 phosphorylation activity of BIN2 and impacting on GL2 expression. Most atrichoblast cells keep  
61 their cell fate identity.

62 (B) Disruption of *O*-glycosylated AGPs (with  $\beta$ -Glc-Y) and the lack of AGP21 (in *agp21* mutant) as  
63 well as abnormal glycosylated AGPs (in *p4h5*, *triple hpgt*, *ray1*, *galt29A* mutants and DP/EDHB  
64 treated roots) may interfere with BRI1-brassinosteroid perception and BIN2 downstream effect  
65 on the RH repressor GL2. Some atrichoblast cells lost their cell fate identity and they develop  
66 ectopic RH cells. As a consequence, GL2 transcriptional repression triggers RH development in  
67 atrichoblast cells producing contiguous RH. In this case the atricoblast cell differentiates as  
68 trichoblast. In addition, disruption of AGP21 peptide (and AGPs) act in a BR-independent manner  
69 but converges on BIN2 to triggers abnormal RH cell fate.

## 70 **Materials and Methods**

71

72 **Growth conditions.** All plant materials used in this study were in the Columbia-0 ecotype  
73 background of *Arabidopsis thaliana*. Seeds were sterilized and placed on half-strength (0.5X)  
74 Murashige and Skoog (MS) medium (Sigma-Aldrich) pH 5.8 supplemented with 0.8% agar. For  
75 root measurements, RNA extraction and confocal microscopy 7-day old seedlings were grown on  
76 square plates placed vertically at 22°C with continuous light, after stratification in dark at 4°C for  
77 5 days on the plates. Seedlings on plates were transferred to soil and kept in the greenhouse in  
78 long-day conditions to obtain mature plants for transformation, genetic crossing, and  
79 amplification of seeds.

80

81 **Plant material.** For identification of homozygous T-DNA knockout lines, genomic DNA was  
82 extracted from rosette leaves. Confirmation by PCR of a unique band corresponding to T-DNA  
83 insertion in the target genes AGP15 (At5G11740: SALK\_114736), AGP21 (At1G55330:  
84 SALK\_140206), HPGT1-HPGT3 (AT5G53340: SALK\_007547, AT4G32120: SALK\_070368,  
85 AT2G25300: SALK\_009405) GALT29A (At1G08280: SALK\_030326; SALK\_113255;  
86 SAIL\_1259\_C01) and RAY1 (At1G70630: SALK\_053158) were performed using an insertion-  
87 specific Lb1.3 for SALK lines or Lb1 for SAIL lines. Primers used are listed in **Table S4**. The stable  
88 transgenic lines used in this study are summarized in **Table S2**.

89

90 **Pharmacological treatments.** ethyl-3,4-dihydroxybenzoate (EDHB) and  $\alpha,\alpha$ -Bipyridyl (DP)  
91 D216305 SIGMA-ALDRICH were used as P4Hs inhibitors. DP chelates the cofactor  $\text{Fe}^{2+}$  [9] and the  
92 EDHB interacts with the oxoglutarate-binding site of P4Hs (Majamaa et al. 1986). Specific Yariv  
93 phenylglycoside (for 1,3,5-tri-(p-glycosyloxyphenylazo)-2,4,6-trihydroxybenzene),  $\beta$ -glucosyl  
94 Yariv phenylglycoside ( $\beta$ -Glc-Yariv) was used for AGP-depletion (Kitazawa et al.2013).  $\alpha$ -  
95 mannosyl Yariv phenylglycoside ( $\alpha$ -Man-Yariv) was used as negative control for phenylglycoside  
96 treatment. Both,  $\beta$ -Glc-Y and  $\alpha$ -Man-Y are Yariv-phenylglycosides and its specificity for AGPs  
97 relies on the  $\beta$ -configuration of the glycosyl residues attached to the  
98 phenylazotrihydroxybenzene core (Yariv et al. 1967). DP, EDHB, or Yariv reagents were added to  
99 MS media when MS plates were made. Seedlings were grown for 4 days in MS 0.5X media and  
100 then transferred for 3 days more to MS 0.5X plates with DP, EDHB, or Yariv reagents at the  
101 concentration indicated.

102

103 **Quantification of RH cell fate.** In order to determine the RH patterning, images of root tips were  
104 taken using an Olympus stereomicroscope at maximum magnification (50X). The presence of  
105 contiguous RH was analyzed using ImageJ, starting from the differentiation zone to the  
106 elongation zone. The amount of contiguous RH was expressed as a percentage of total RH for  
107 rectangular root areas of 200  $\mu\text{m}$  in width x 2mm in length (n=20) with three biological  
108 replicates. Quantitative and statistical analysis was carried on using GraphPad software. To  
109 analyze the alteration in RH cell fate, root cell walls of reporter lines were stained with 5  $\mu\text{g}/\text{ml}$   
110 propidium iodide and confocal microscopy images were taken using a Zeiss LSM 710 Pascal  
111 microscope, 40X objective N/A= 1.2.

112 **AGP21 variants.** AGP21 promoter region (AGP21p) comprising 1,5 Kbp upstream of +1 site was  
113 amplified by PCR and cloned into pGWB4 to obtain AGP21p::GFP construct. Synthetic DNA was  
114 designed containing full length AGP21 cDNA and Venus fluorescent protein cDNA between  
115 AGP21 signal sequence and the mature polypeptide (Venus-AGP21), containing Gateway<sup>TM</sup> (Life  
116 Technologies) attB1 and attB2 sites. Recombinase-mediated integration of the PCR fragment  
117 was made into pEntry4Dual. pEntry4Dual/Venus-AGP21 construction was recombined into the  
118 vector pGWB2 (Invitrogen, Hygromycin R) in order to overexpress Venus-AGP21 under 35S  
119 mosaic virus promoter (35Sp::Venus-AGP21). Also, Venus-AGP21 construct was cloned into  
120 pGWB1 (no promoter, no tag) and AGP21p was sub-cloned in the resulting vector to express  
121 AGP21 reporter under the control of its endogenous promoter (AGP21p::Venus-AGP21). Wild  
122 type and T-DNA *agp21* mutant plants were transformed by using *Agrobacterium* (strain  
123 GV3101+pSoup). Plants were selected with hygromycin (30 µg/ml) and several independent  
124 transgenic plants were isolated for each construct. At least three homozygous independent  
125 transgenic lines of Col-0/AGP21p::GFP, *agp21*/AGP21p::Venus-AGP21 and *agp21*/35Sp::AGP21-  
126 GFP were obtained and characterized.

127

128 **Gene expression analysis.** For RT-PCR analysis, total RNA was isolated from roots of 7-day-old  
129 seedlings using RNeasy Plant Mini Kit (Qiagen) according to the manufacturer's instructions.  
130 cDNA synthesis was achieved using M-MLV reverse transcriptase (Promega). PCR reactions were  
131 performed in a T-ADVANCED S96G (Biometra) using the following amplification program: 4 min  
132 at 95°C, followed by 35 cycles of 20 secs at 95°C, 30 secs at 57°C and 30 secs at 72°C. RT-PCR was  
133 performed to assess AGP15 and AGP21 transcript levels in wild type and T-DNA mutant *agp15*  
134 and *agp21*. PP2A was used as an internal standard. All primers used are listed in **Table S4**.

135

136 **Confocal microscopy.** Confocal laser scanning microscopy was performed using Zeiss LSM 510  
137 Meta and Zeiss LSM 710 Pascal. Fluorescence was analyzed by using laser lines of 488 nm for  
138 GFP or 514 nm for YFP excitation, and emitted fluorescence was recorded between 490 and 525  
139 nm for GFP and between 530 and 600 nm for YFP (40X objective, N/A= 1.2). Z series was done  
140 with an optical slice of 2µm, and intensities was summed for quantification of fluorescence  
141 along a segmented line using plot profile command in Image J, five replicates for each of five  
142 roots were observed.

143

144 **AGP21 Immunoblotting detection.** Proteins were extracted from roots of 7-day-old seedlings  
145 using extraction buffer (20mM TRIS-HCl pH8.8, 150mM NaCl, 1mM EDTA, 20% glycerol, 1mM  
146 PMSF, 1X protease inhibitor Complete<sup>®</sup> Roche) at 4°C. After centrifugation at 21.000g at 4°C for  
147 20min, protein concentration in the supernatant was measured and equal protein amounts were  
148 loaded onto a 6% SDS- PAGE gel. Proteins were separated by electrophoresis and transferred to  
149 nitrocellulose membranes. Anti-GFP mouse IgG (Roche Applied Science) was used at a dilution of  
150 1:1.000 and it was visualized by incubation with goat anti-mouse IgG secondary antibodies  
151 conjugated to horseradish peroxidase (1:10.000) followed by a chemiluminescence reaction  
152 (Clarity<sup>™</sup> Western ECL Substrate, BIO-RAD).

153

154 **Transient expression assays in *Nicotiana benthamiana*.** To test the sub-cellular localization of  
155 AGP21, 5-day-old *N. benthamiana* leaves were infiltrated with *Agrobacterium* strains (GV3101)  
156 carrying 35Sp::Venus-AGP21 and BAK1-RFP constructs. After 2 days, images of the lower leaf  
157 epidermal cells were taken using a confocal microscope (LSM5 Pascal) to analyze Venus-AGP21  
158 expression. Plasmolysis was done using 800 mM mannitol.

159

160 **Molecular dynamics (MD) simulations.** MD simulations were performed on two non-  
161 glycosylated and seven glycosylated Ala1-Pro2-Ala3-Pro4-Ser5-Pro6-Thr7-Ser8 (APAPSPTS)  
162 peptides, in which the starting structure was constructed as a type II polyproline helix, with  $\phi \sim -$   
163 75 and  $\psi \sim 145$ . The non-glycosylated motifs differ by the presence of alanine (AAAASATS),  
164 proline (APAPSPTS) or 4-*trans*-hydroxyproline (AOAOSOTS) residues. At the same time, the  
165 glycosylated motifs reflect different peptide glycoforms, constructed as full glycosylated  
166 (AOAOSOTS). Every *O*-glycosylation site was filled with an arabinogalactan oligosaccharide  
167 moiety (**Supplementary Item 5**), in which the *O*-glycan chains and carbohydrate-amino acid  
168 connections were constructed based on the most prevalent geometries obtained from solution  
169 MD simulations of their respective disaccharides, as previously described (Pol-Fachin & Verli  
170 2012), thus generating the initial coordinates for glycopeptide MD calculations. Such structures  
171 were then solvated in rectangular boxes using periodic boundary conditions and the SPC water  
172 model (Berendsen et al. 1984). Both carbohydrate and peptide moieties were described under  
173 GROMOS96 43a1 force field parameters, and all MD simulations and analyses were performed  
174 with GROMACS simulation suite, version 4.5.4 (Hess et al. 2008). The Lincs method (Hess et al.  
175 1997) was applied to constrain covalent bond lengths, allowing an integration step of 2 fs after  
176 an initial energy minimization using the Steepest Descents algorithm. Electrostatic interactions  
177 were calculated with the generalized reaction-field method Tironi et al. (1995). Temperature and  
178 pressure were kept constant at 310 K and 1.0 atom, respectively, by coupling (glyco)peptides  
179 and solvent to external baths under V-rescale thermostat Bussi et al. 2007) and Berendsen  
180 barostat (Berendsen et al. 1987) with coupling constants of  $t = 0.1$  and  $t = 0.5$ , respectively, via  
181 isotropic coordinate scaling. The systems were heated slowly from 50 to 310 K, in steps of 5 ps,  
182 each one increasing the reference temperature by 50 K. After this thermalization, all simulations  
183 were further extended to 100 ns. See **Table S3**.

184 **Table S1.** GTs involved in AGP modification used in this study.

185

| Protein/Gene code                                                          | CAZY family | Full name/ Activity                                                                                                                                                                       | References                                      |
|----------------------------------------------------------------------------|-------------|-------------------------------------------------------------------------------------------------------------------------------------------------------------------------------------------|-------------------------------------------------|
| <b>Enzymes acting on AGP and related glycoproteins</b>                     |             |                                                                                                                                                                                           |                                                 |
| <b>HPGT1/AT5G53340</b><br><b>HPGT2/AT4G32120</b><br><b>HPGT3/AT2G25300</b> | GT31        | Hydroxyproline Galactosyltransferases<br>1-3/<br>transfer of D-Galp to the hydroxyl-<br>group on Hyp residues in AGPs and<br>related glycoproteins                                        | Egelund et al. 2007                             |
| <b>GalT29A/AT1G08280</b>                                                   | GT29        | Galactosyltransferase 29A/<br>transfers galactose in $\beta$ -D-(1 $\rightarrow$ 6)<br>position as elongating enzyme or in $\beta$ -<br>D-(1 $\rightarrow$ 3)-galactosyl oligosaccharides | Dilokpimol et al.<br>2014; Geshi et al.<br>2013 |
| <b>RAY1/AT1G70630</b>                                                      | GT77        | Reduced Arabinose Yariv 1/<br>$\beta$ -arabinofuranosyltransferase that<br>adds arabinose on the AGP backbone                                                                             | Gille et al. 2013                               |
| <b>FUT4/AT2G15390</b><br><b>FUT6/AT1G14080</b>                             | GT77        | Fucosyltransferase/<br>transfers fucose as $\alpha$ -L-(1 $\rightarrow$ 2) position<br>to $\alpha$ -L-Araf-(1 $\rightarrow$ ) unit                                                        | Tryfona et al 2014                              |
| <b>Enzymes acting on EXTs and related glycoproteins</b>                    |             |                                                                                                                                                                                           |                                                 |
| <b>RRA3/AT1G19360</b>                                                      | GT77        | Reduced Residual Arabinose 3/<br>Arabinosyltransferase that transfers of<br>$\beta$ -L-Araf-(1 $\rightarrow$ 2) units                                                                     | Egelund et al. 2007<br>Velasquez et al.<br>2011 |
| <b>SGT1 (SERGALT1)</b><br>/At3g01720                                       | GT96        | peptidyl serine O- $\alpha$ -<br>galactosyltransferase                                                                                                                                    | Saito et al. 2014                               |

186



187 **Table S2.** Mutants and transgenic lines generated and used in this study.

| Gene name                                        | AGI code  | Genetic background                                             | Transgenic line                                                                   | Reference                                                          |
|--------------------------------------------------|-----------|----------------------------------------------------------------|-----------------------------------------------------------------------------------|--------------------------------------------------------------------|
| <b>RRA3</b>                                      | AT1G19360 | <i>rra3</i>                                                    | -                                                                                 | Egelund et al. 2007<br>Velasquez et al. 2011                       |
| <b>SGT1</b>                                      | At3g01720 | <i>sgt1 (sergalt1) rra3</i>                                    | -                                                                                 | Saito et al. 2014<br>Velasquez et al. 2015a                        |
| <b>P4H5</b>                                      | AT2G17720 | <i>p4h5</i>                                                    | -                                                                                 | Velasquez et al. 2011                                              |
| <b>GaIT29A</b>                                   | AT1G08280 | <i>galt29A</i>                                                 | -                                                                                 | Dilokpimol et al. 2014;<br>Geshi et al. 2013                       |
| <b>RAY1</b>                                      | AT1G70630 | <i>ray1</i>                                                    | -                                                                                 | Gille et al. 2013                                                  |
| <b>AGP15</b>                                     | AT5G11740 | <i>agp15</i><br><i>agp15,agp21</i>                             | -                                                                                 | This work<br>This work                                             |
| <b>AGP21</b>                                     | AT1G55330 | <i>agp21</i><br><i>agp21</i><br><i>agp21</i><br>Col-0<br>Col-0 | -<br>35Sp::Venus-AGP21<br>AGP21p::Venus-AGP21<br>35Sp::Venus-AGP21<br>AGP21p::GFP | This work<br>This work<br>This work<br>This work<br>This work      |
| <b>Brassinosteroid lines</b>                     |           |                                                                |                                                                                   |                                                                    |
| <b>BRI1</b>                                      | AT4G39400 | <i>bri1-5</i><br><i>bri1-116</i><br><i>bri1-116</i>            | -<br>-<br>AGP21p::GFP<br>35Sp::BRI1-GFP                                           | Noguchi et al. 1999<br>Li & Chory 1999<br>This work                |
| <b>BZR1</b>                                      | AT1G75080 | <i>bzr1-D</i><br>Col-0                                         | BZR1p::BZR1-YFP<br>35Sp::BZR1-GFP<br>BZR1-D<br><i>bzr1-1 crispr-cas</i>           | Wang et al. 2002<br>Chaiwanon et al. 2015<br><br>Saito et al. 2018 |
| <b>BES1</b>                                      | AT1G19350 | <i>bes1-D</i>                                                  | -<br>35Sp::BES1-GFP<br>BES1-D<br><i>Bes1-1 bzr1-1 crispr-cas</i>                  | Yin et al. 2002<br>Saito et al. 2018                               |
| <b>BIN2</b>                                      | AT4G18710 |                                                                | BIN2p::BIN2-GFP                                                                   | Yin et al. 2002                                                    |
| <b>BIL1</b>                                      | AT2G30980 | <i>bin2-1</i><br><i>bin2,bil1,bil2</i>                         | -                                                                                 | Kim 2012                                                           |
| <b>BIL2</b>                                      | AT1G06390 |                                                                | -                                                                                 | Yan et al. 2009                                                    |
| <b>Trichoblast and Atrichoblast marker lines</b> |           |                                                                |                                                                                   |                                                                    |
| <b>RHD6</b>                                      | AT1G66470 | Wt Col-0                                                       | RHD6p::RHD6-GFP                                                                   | Yi et al. 2010                                                     |

|             |           |          |                 |                 |
|-------------|-----------|----------|-----------------|-----------------|
| <b>RSL4</b> | AT1G27740 | Wt Col-0 | RSL4p::RSL4-GFP | Yi et al. 2010  |
| <b>GL2</b>  | AT1G79840 | Wt Col-0 | GL2p::GL2-GFP   | Lin et al. 2015 |
| <b>EXP7</b> | AT1G12560 | Wt Col-0 | EXP7p::nGFP     | Kim et al. 2006 |

189 **Table S3.** Average  $\zeta$  angle values\* during the performed MD simulations of AGP21 peptide.

190

| Peptide state        | $\zeta$ angle 1     | $\zeta$ angle 2     | $\zeta$ angle 3     | $\zeta$ angle 4     | $\zeta$ angle 5     |
|----------------------|---------------------|---------------------|---------------------|---------------------|---------------------|
|                      | Ala1-Pro2-Ala3-Pro4 | Pro2-Ala3-Pro4-Ser5 | Ala3-Pro4-Ser5-Pro6 | Pro4-Ser5-Pro6-Thr7 | Ser5-Pro6-Thr7-Ser8 |
| Type-II polyproline  | -110 ± 15           | -110 ± 15           | -110 ± 15           | -110 ± 15           | -110 ± 15           |
| non-Glyco, Ala AGP21 | <b>159 ± 89</b>     | <b>149 ± 116</b>    | <b>153 ± 126</b>    | <b>166 ± 97</b>     | <b>-177 ± 75</b>    |
| non-Glyco, Pro AGP21 | -124 ± 46           | -125 ± 31           | -130 ± 49           | -130 ± 31           | -149 ± 49           |
| non-Glyco, Hyp AGP21 | -130 ± 47           | -125 ± 31           | -133 ± 46           | -128 ± 32           | -150 ± 51           |
| Glyco1,2,3 AGP21     | <b>-112 ± 25</b>    | <b>-175 ± 16</b>    | <b>-168 ± 22</b>    | <b>-150 ± 21</b>    | <b>-131 ± 43</b>    |

191

\* Average ± standard deviation values measured for the second half of MD simulations (from 50 ns to 100 ns).

192 **Table S4.** Primers used in this study.

193

| Purpose        | Name    | Sequence (5' to 3')                                 |
|----------------|---------|-----------------------------------------------------|
| RT-PCR AGP15   | Forward | CATCGGCACAATCTGAGG                                  |
|                | Reverse | ACCATCACAGTAACTTAGATCC                              |
| RT-PCR AGP21   | Forward | GCAATGAAGATGAAGATGATGG                              |
|                | Reverse | TCAGAAGTTGGGCTTGGAG                                 |
| RT-PCR PP2A    | Forward | TCCGAGATCACATGTTCCAAACTC                            |
|                | Reverse | CCGTATCATGTTCTCCACAACCG                             |
| T-DNA AGP15    | Forward | GACACGAAAGACGCTGAGATC                               |
|                | Reverse | AGGAGAAATTTGCACCCATTC                               |
| T-DNA AGP21    | Forward | TTGGTGTGAACGTTGGTATG                                |
|                | Reverse | CAAAAGATGAAACCAGATGCC                               |
| T-DNA GALT29A  | Forward | TTGTGGCTCGAGTAAACCC                                 |
|                | Reverse | AAGCATGAGATTGTGATTCGG                               |
| T-DNA RAY1     | Forward | TTGGAGCGTATGGATCAAAG                                |
|                | Reverse | GAGTTATGCTCACGAGCTTGG                               |
| Promoter AGP21 | Forward | TAATGCCAACTTTGTACAAAAAGCAGGCT                       |
|                | Reverse | CCCAGCTTTCTGTAC                                     |
| Venus-AGP21    | Forward | GGGGACAAGTTTGTACAAAAAGCAGGCTTAACCatggaggcaatgaagatg |
|                | Reverse | GGGGACCACTTTGTACAAGAAAGCTGGGTctcaaaagatgaaccaga     |
| RT-PCR AGP15   | Forward | CATCGGCACAATCTGAGG                                  |
|                | Reverse | ACCATCACAGTAACTTAGATCC                              |
| RT-PCR AGP21   | Forward | GCAATGAAGATGAAGATGATGG                              |
|                | Reverse | TCAGAAGTTGGGCTTGGAG                                 |

194

## 195 Supplemental References

196

197 Berendsen HJC, Postma JPM, van Gunsteren WF, DiNola A, Haak JR (1984) Molecular-dynamics  
198 with coupling to an external bath. *The Journal of Chemical Physics* 81:3684-3690

199 Berendsen HJC, Grigera JR, Straatsma TPJ (1987) The missing term in effective pair potentials.  
200 *The Journal of Physical Chemistry* 91:6269-6271

201 Bussi G, Donadio D, Parrinello MJ (2007) Canonical sampling through velocity rescaling. *The*  
202 *Journal of Chemical Physics* 126:014101

203 Chaiwanon, J., & Wang, Z.-Y. (2015). Spatiotemporal Brassinosteroid Signaling and Antagonism  
204 with Auxin Pattern Stem Cell Dynamics in Arabidopsis Roots. *Current Biology* 25(8), 1031–  
205 1042. <http://doi.org/10.1016/j.cub.2015.02.046>

206 Dilokpimol, A., Poulsen, C.P., Vereb, G., Kaneko, S., Schulz, A., and Geshi, N. (2014).  
207 Galactosyltransferases from *Arabidopsis thaliana* in the biosynthesis of type-II  
208 arabinogalactan: molecular interaction enhances enzyme activity. *BMC Plant Biol.* 14:90.  
209 doi:10.1186/1471-2229-14-90

210 Egelund, J., Obel, N., Ulvskov, P., Geshi, N., Pauly, M., Bacic, A., and Larsen Petersen, B. (2007).  
211 Molecular characterization of two Arabidopsis thaliana glycosyltransferase mutants, rra1 and  
212 rra2, which have a reduced residual arabinose content in a polymer tightly associated with  
213 the cellulosic wall residue. *Plant. Mol. Biol.* 64: 439–451.S12

214 Geshi, N., Johansen, J.N., Dilokpimol, A., Rolland, A., Belcram, K., Verger, S., et al. (2013). A  
215 galactosyltransferase acting on arabinogalactan protein glycans is essential for embryo  
216 development in Arabidopsis. *Plant J.* 76, 128–137. doi: 10.1111/tbj.12281

217 Gille S, Sharma V, Baidoo EE, Keasling JD, Scheller HV, Pauly M. (2013). Arabinosylation of a  
218 Yariv-precipitable cell wall polymer impacts plant growth as exemplified by the Arabidopsis  
219 glycosyltransferase mutant ray1. *Mol Plant.* 6(4):1369-1372. doi: 10.1093/mp/sst029

220 Hess B, Kutzner C, Van Der Spoel D, Lindahl E (2008) GROMACS 4: Algorithms for highly efficient,  
221 load- balanced, and scalable molecular simulation. *Journal of Chemical Theory and*  
222 *Computation* 4:435-444

223 Hess B, Bekker H, Berendsen H.J.C., Fraaije J.G.E.M. (1997) LINCS: A linear constraint solver for  
224 molecular simulations. *Journal of Computational Chemistry* 18:1463-1472

225 Houbaert A et al. (2018) POLAR-guided signaling complex assembly and localization drive  
226 asymmetric cell division. *Nature* 563(7732), 574-578

227 Kim T-W, et al. (2012). Brassinosteroid regulates stomatal development by GSK3-mediated  
228 inhibition of a MAPK pathway. *Nature* 482(7385), 419–422.  
229 <http://doi.org/10.1038/nature10794>

230 Kim, D.W. et al. (2006). Functional Conservation of a Root Hair Cell-Specific cis-Element in  
231 Angiosperms with Different Root Hair Distribution Patterns. *Plant Cell* 18(11), 2958–2970

232 Noguchi, T., Fujioka, S., Choe, S., Takatsuto, S., Yoshida, S., Yuan, H., ... Tax, F. E. (1999).  
233 Brassinosteroid-Insensitive Dwarf Mutants of Arabidopsis Accumulate Brassinosteroids. *Plant*  
234 *Physiology* 121(3), 743–752

235 Pol-Fachin L, Verli H (2012) Structural glycobiology of the major allergen of *Artemisia vulgaris*  
236 pollen, Art v 1: O-glycosylation influence on the protein dynamics and allergenicity.  
237 *Glycobiology* 22:817-825

238 Saito, F., Suyama, A., Oka, T., Yoko-o, T., Matsuoka, K., Jigami, Y., and Shimma, Y. (2014).  
239 Identification of novel peptidyl serine O-galactosyltransferase gene family in plants. *J. Biol.*  
240 *Chem.* 30:20405–20420

- 241 Saito M., Kondo Y., and Fukuda H. (2018) BES1 and BZR1 redundantly promote phloem and  
242 xylem differentiation. *Plant Cell Physiol.* 2018 59(3):590-600
- 243 Tironi IG, Sperb R, Smith PE, van Gunsteren WF (1995) A generalized reaction field method for  
244 molecular-dynamics simulations. *The Journal of Chemical Physics* 102:5451-5459
- 245 Wang Z-Y, Nakano T, Gendron J, He J, Chen M, Vafeados D, Yang Y, Fujioka S, Yoshida S, Asami T  
246 & Chory J (2002). Nuclear-Localized BZR1 Mediates Brassinosteroid-Induced Growth and  
247 Feedback Suppression of Brassinosteroid Biosynthesis. *Developmental Cell* 2, 505–513.  
248 doi.org/10.1016/S1534-5807(02)00153-3
- 249 Yan Z, Zhao J, Peng P, Chihara RK, Li J. (2009). BIN2 functions redundantly with other Arabidopsis  
250 GSK3-like kinases to regulate brassinosteroid signaling. *Plant Physiology* 150:710–721. doi:  
251 10.1104/pp.109.138099
- 252 Yin Y, Wang ZY, Mora-Garcia S, Li J, Yoshida S, Asami T, Chory J. (2002) BES1 accumulates in the  
253 nucleus in response to brassinosteroids to regulate gene expression and promote stem  
254 elongation. *Cell* 109(2):181-91

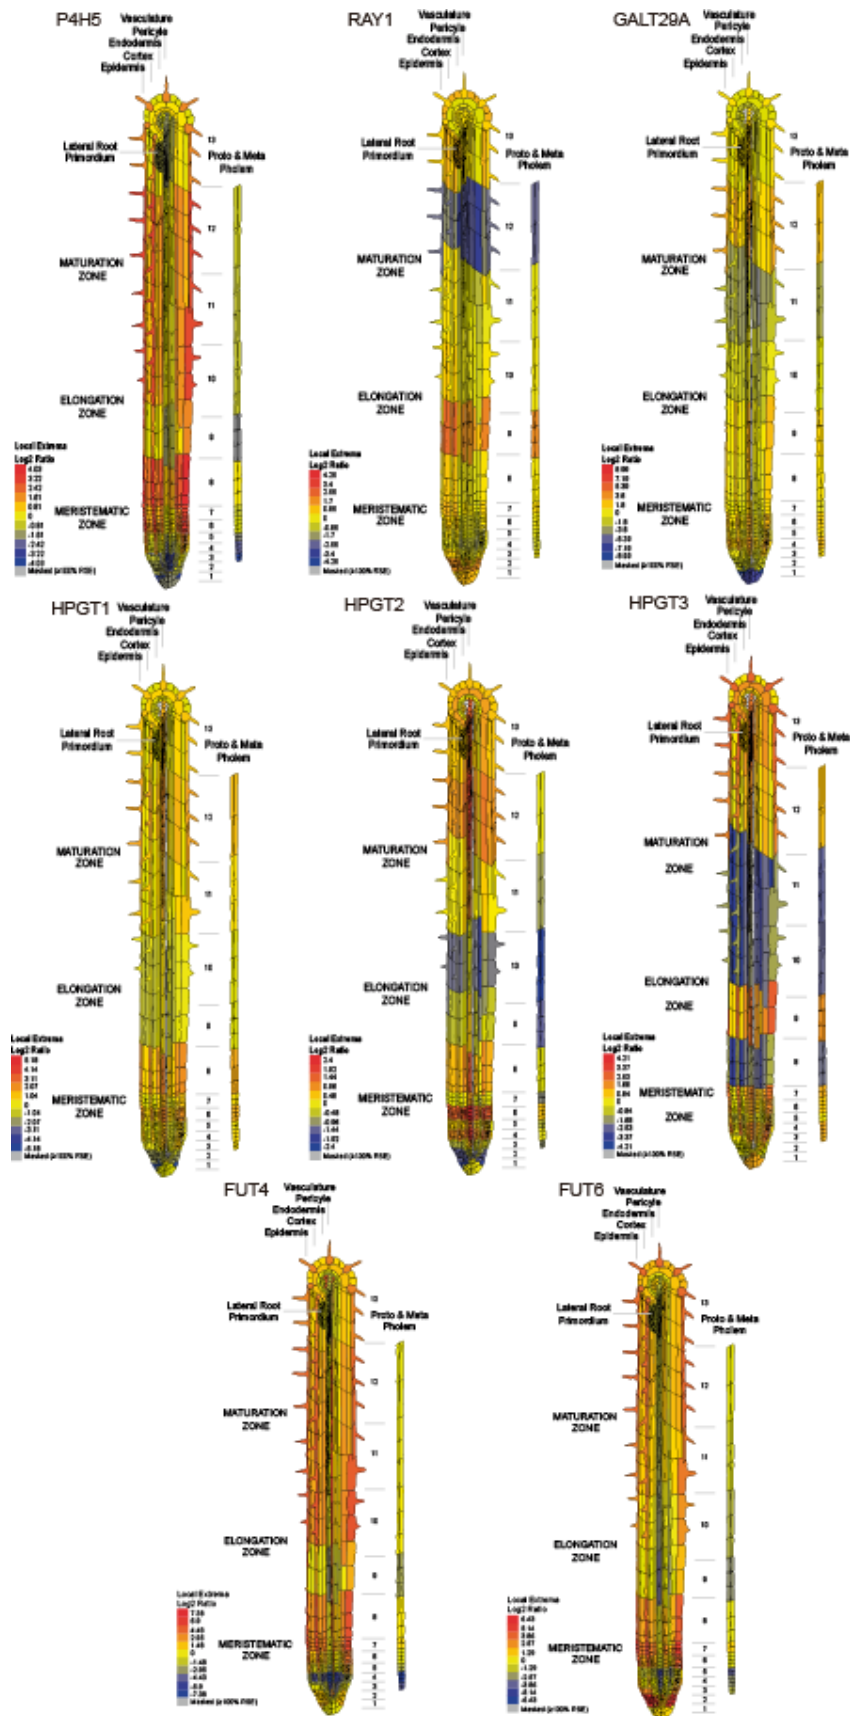

256 **Supplemental Item 1. Expression pattern of enzymes involved in proline hydroxylation and O-**  
257 **glycosylation of AGPs in the *Arabidopsis* roots.**

258 Expression of P4H5, GALT29A, RAY1, HPTG1-HPGT3 and FUT4/FUT6 are based on ePlant server  
259 (<http://bar.utoronto.ca/eplant/>), tissue and experiments eFP viewers. Most of these AGP-  
260 modifying enzymes are highly expressed in epidermal cells.



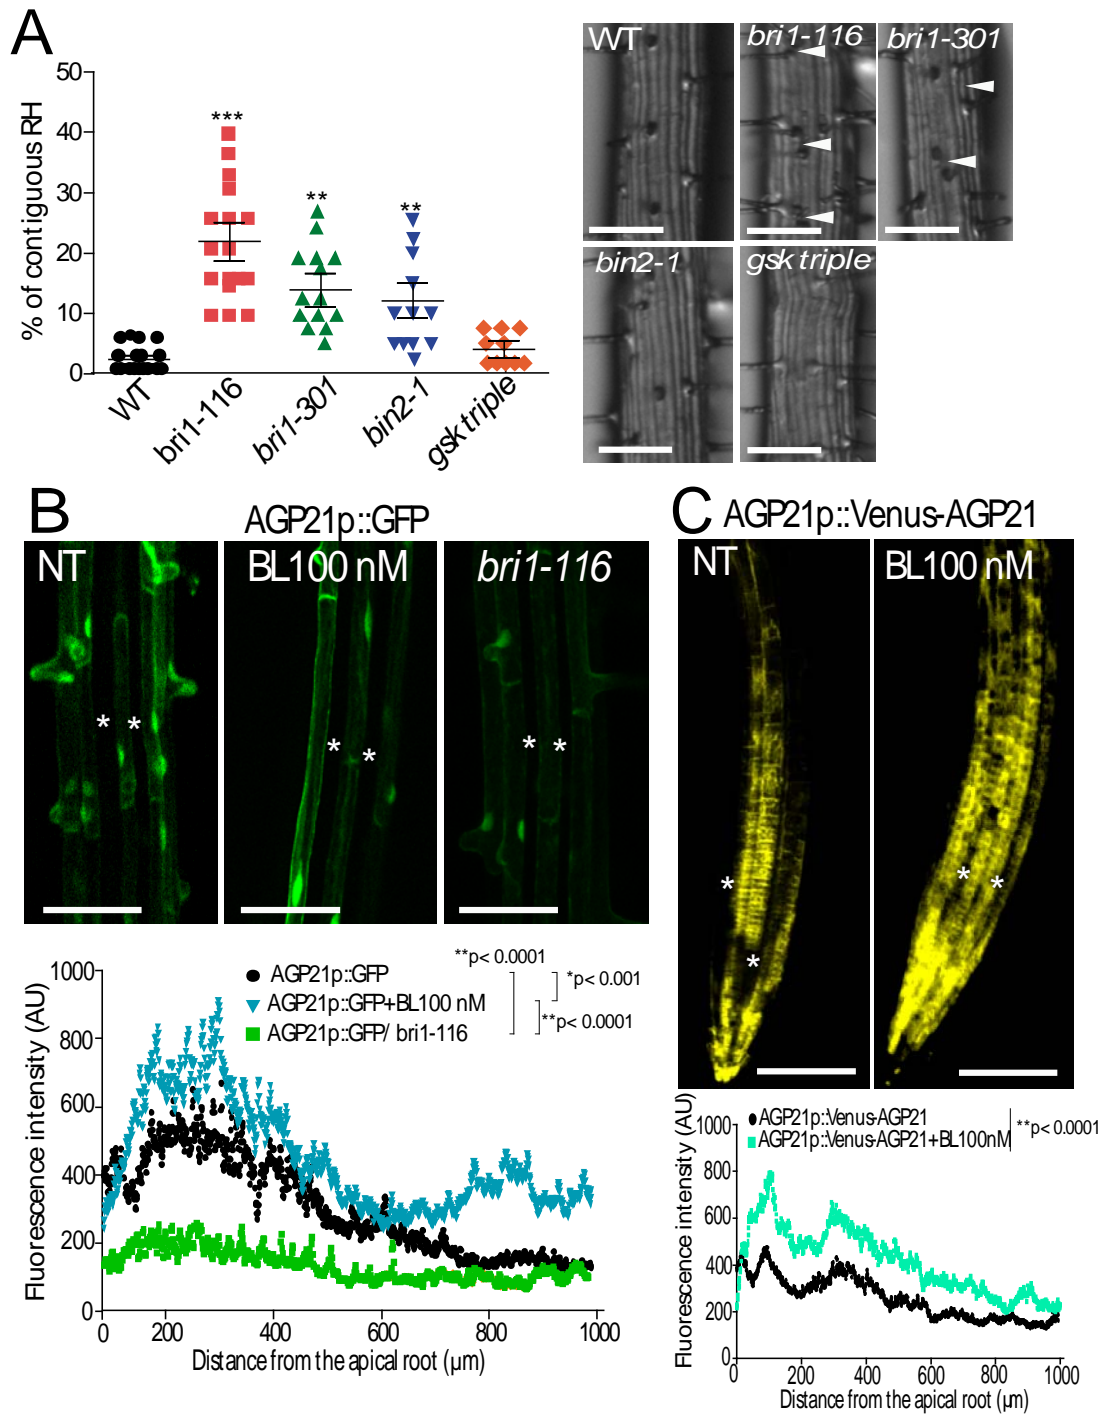

261

262

263

264 **Supplemental Item 2. BR deficiency triggers RH abnormal development and BR control of**  
 265 **AGP21 expression.**

266 (A) Contiguous RH phenotype developed in BR constitutive active *bin2-1* and *gsk triple* (mutant  
 267 mutant *bin2-3, bil1, bil2*) as well as in *bri1* mutants. Pictures indicate the RH phenotype in detail.

268 Arrowheads indicate two contiguous RH cell protuberances. Scale bar= 50  $\mu\text{m}$ . *P*-value of one-

269 way ANOVA, (\*\*\*)  $P < 0.0001$ , (\*\*)  $P < 0.001$ .

270 (B) Effect of 100 mM BL (brassinolide, an active form of BR) or *bri1-116* mutation on the  
271 expression of AGP21p::GFP transcriptional reporter. Quantification of V-AGP21 intensity signal is  
272 indicated along the root axis in each treatment. Scale bar= 50  $\mu$ m. Asterisk indicates lack of  
273 expression in atrichobast cells. Scale bar= 50  $\mu$ m.

274 (C) Effect of BL on the expression of the AGP21p::V-AGP21 protein reporter. Quantification of V-  
275 AGP21 intensity signal is indicated along the root axis in each treatment. Scale bar= 200  $\mu$ m.  
276 Asterisk indicates lack of expression in atrichobast cells.

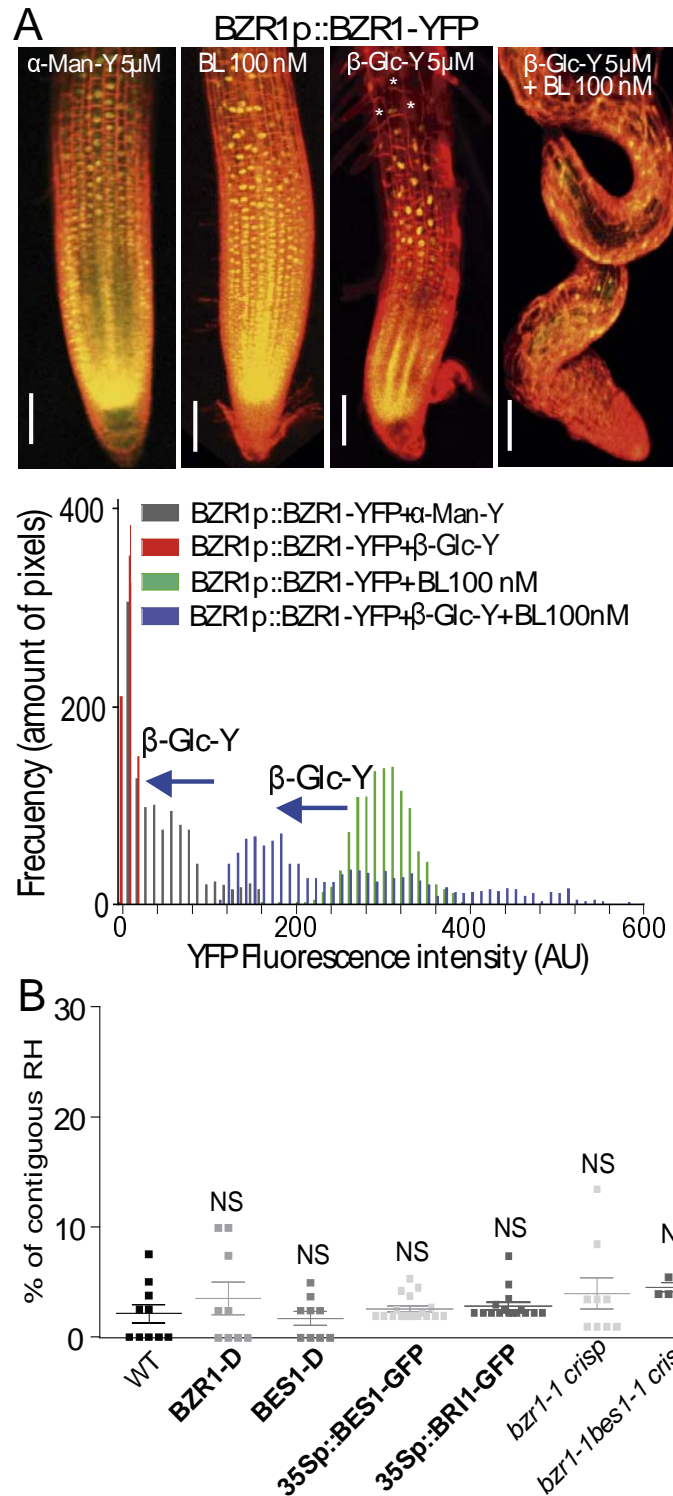

277  
278

279 **Supplemental item 3. Disruption of AGPs partially suppresses the BR-mediated BZR1**  
280 **expression.**

281 (A)  $\beta$ -Glc-Y supressor effect on the BL response in the roots using BZR1p::BRZ1-YFP as a reporter.  
282 Representative Root pictures of each treatment on the left. On the right, histogram of the YFP-

283 signal intensity (x-axis) quantification per pixel number (y axis). AU= Arbitrary units. Scale bar=  
284 50  $\mu\text{m}$ . Asterisk indicates lack of expression.  
285 (B) RH phenotype in BZR1-D, BES1-D, 35Sp::BES1-GFP, 35Sp::BZR1-GFP, CRISPR-CAS *bzr1* and  
286 CRISPR-CAS *bes1 bzr1*. *P*-value of one-way ANOVA, (\*\*)  $P < 0.001$ . NS= not significant differences.  
287 Error bars indicate  $\pm$ SD from biological replicates.

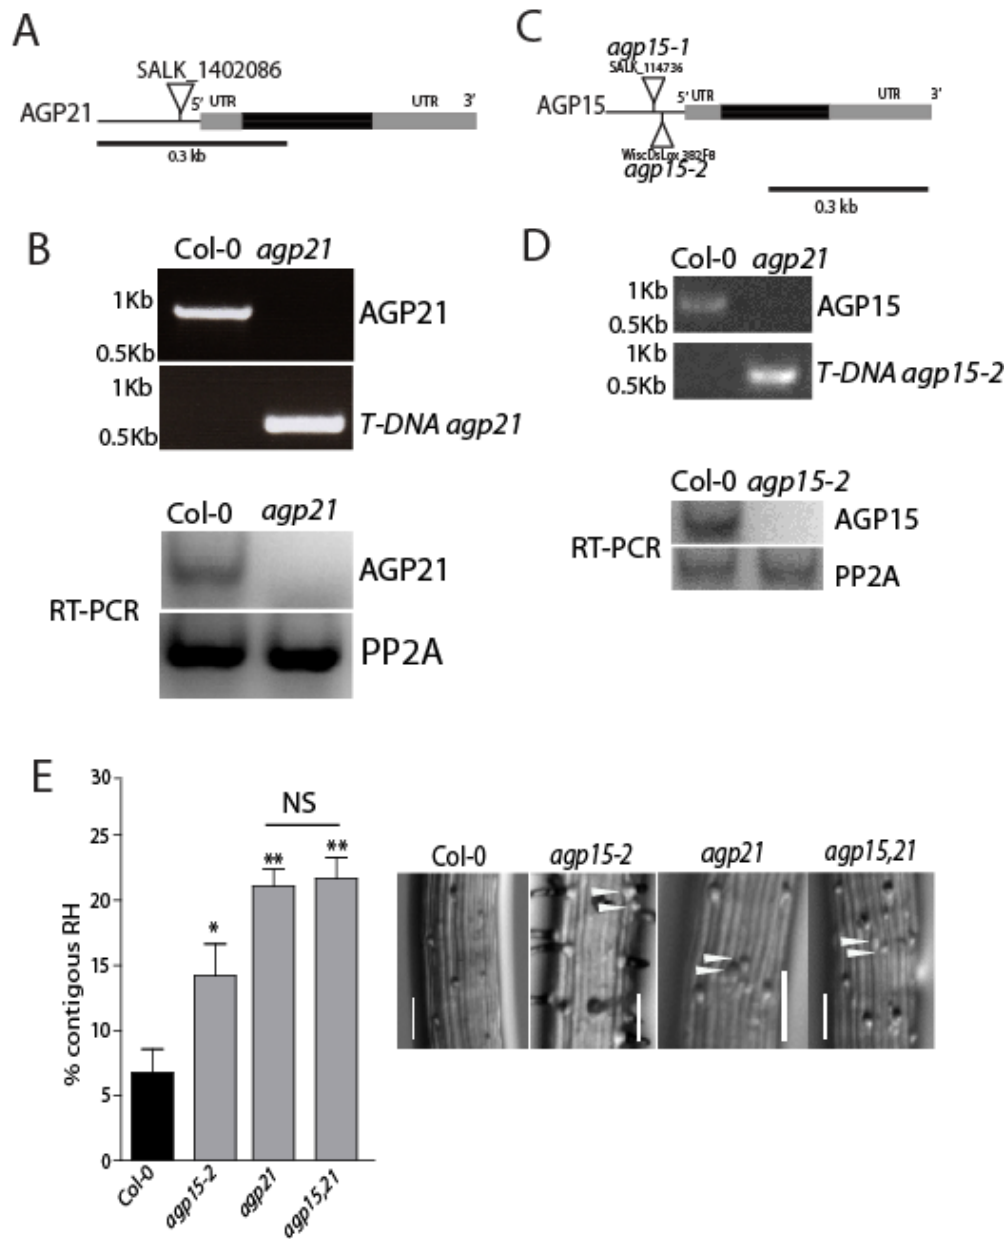

288  
289

290 **Supplemental item 4. *agp21* and *agp15* mutants characterization showed a redundant effect**  
291 **in RH cell fate.**

292 (A) Schematic representation of AGP21 peptide. Position of *agp21* T-DNA insertion is indicated  
293 in the promoter region.

294 (B) Validation of *agp21* T-DNA mutant line. Total RNA was extracted from 10 days old roots.  
295 PP2A was used as control. The primers used for RT-PCR are listed in **Table S3**.

296 (C) Schematic representation of AGP15 peptide. Positions of T-DNA insertions are indicated.  
297 Prom: promoter region.

298 (D) Validation of *agp15* T-DNA mutant lines. Total RNA was extracted from 10 days old roots.  
299 PP2A was used as a control. The primers used for RT-PCR are listed in **Table S3**.

300 (E) Contiguous RH phenotype developed in the genetic disruption of multiple AGP peptides.  
301 Pictures below each graph indicate the RH phenotype in detail. *P*-value of one-way ANOVA, (\*\*)  
302  $P < 0.001$ , (\*)  $P < 0.01$ . NS= not significant different. Error bars indicate  $\pm$ SD from 3 biological  
303 replicates. Arrowheads indicate two contiguous RH cell protuberances. Scale bar= 50  $\mu$ m.  
304

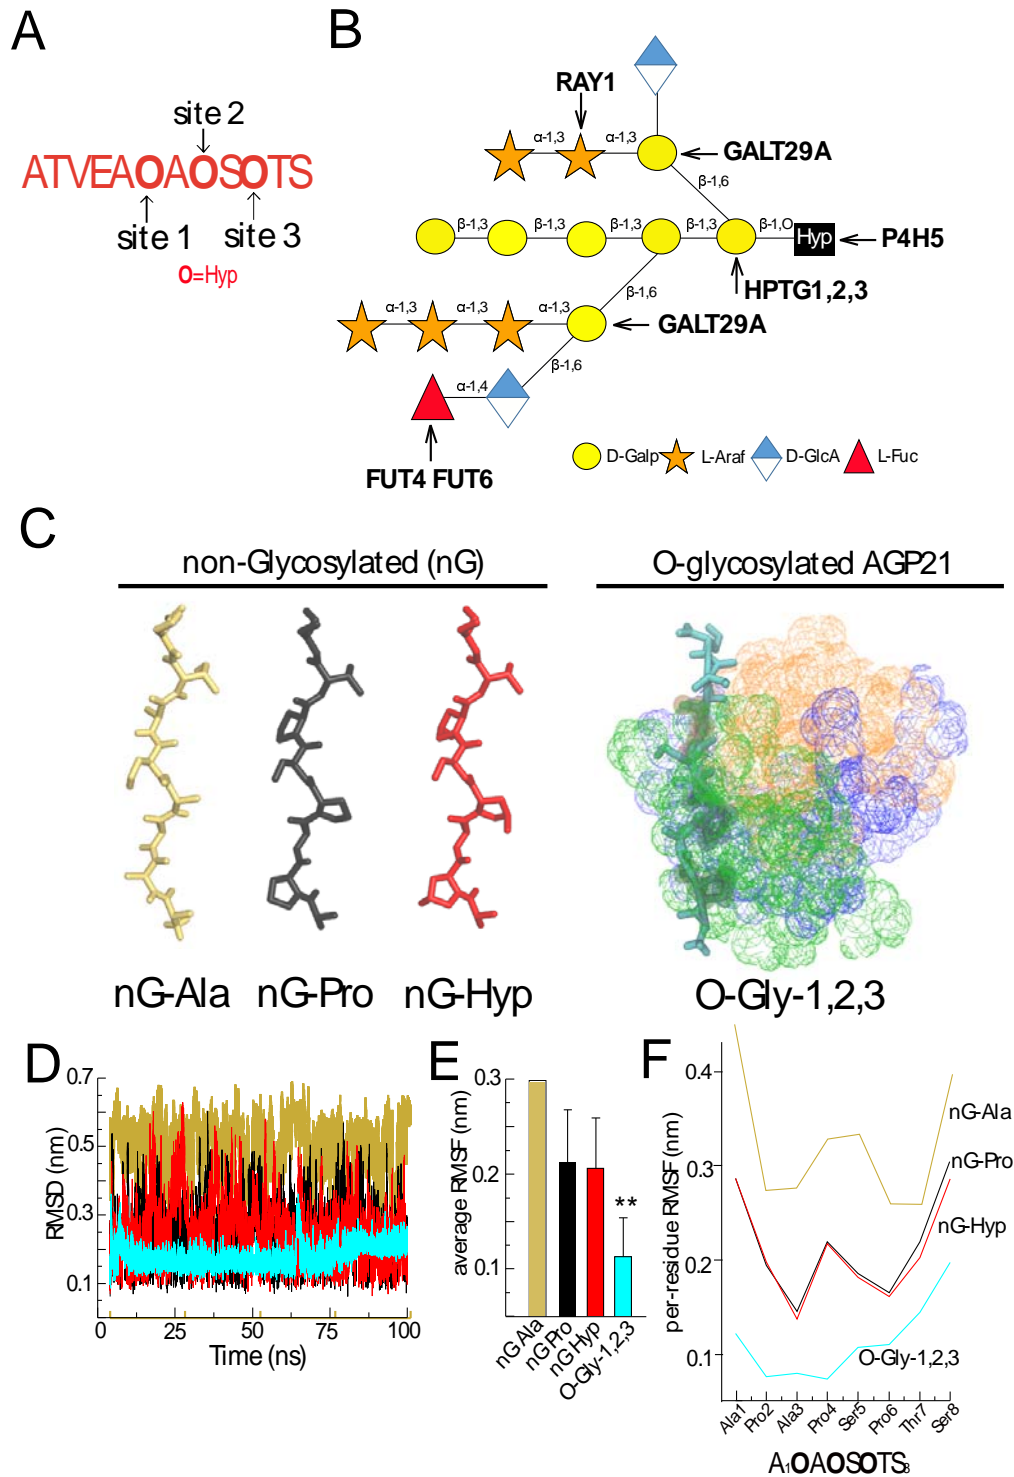

305

306

307 **Supplemental item 5. O-glycans provide stability to the AGP21 peptide conformation.**

308 (A) Three putative O-glycosylation sites present in the mature AGP21 peptide ATVEAOAOSOTS  
 309 (O=Hyp).

310 (B) Arabinogalactan oligosaccharide (AG) composed of 15 residues including L-Glucuronic Acid  
 311 (GlcA) and L-Fucose attached to each Hyp units used during MD simulations. Schematic

312 representation of the arabinogalactan oligosaccharide used to construct AOAOSOTS peptide  
313 glycosylated form. Mutants for some GTs used in this study (*p4h5*, triple *hpgt*, *galt29A*, *ray1* and  
314 *fut4 fut6*) are indicated.

315 (C) Most representative structure for the simulated glyco-peptides, in which the protein moiety  
316 is shown as sticks (with *O*-glycosylated amino acids as VDW) and the carbohydrate moieties are  
317 shown as dots. The *O*-glycan chains linked to site 1 (Hyp<sub>2</sub>) are colored as green; to site 2 (Hyp<sub>4</sub>)  
318 as blue; and to site 3 (Hyp<sub>6</sub>) as orange. *O*-Gly-1,2,3 refers to a fully *O*-glycosylated AGP21  
319 peptide.

320 (D) All-atom Root Mean Square Deviation (RMSD) for APAPSPTS protein moiety in the performed  
321 MD calculations.

322 (E) Root Mean Square Fluctuation (RMSF) obtained by averaging the per-residue values in each  
323 peptide simulation. nG abbreviates non-glycosylated; *O*-Gly-1,2,3 refers to a fully *O*-glycosylated  
324 AGP21 peptide.

325 (F) Per-residue RMSF for each MD condition.
