1 **A cell surface arabinogalactan-peptide influences root hair cell fate**

2  
3  
4 Cecilia Borassi<sup>1,#</sup>, Javier Gloazzo Dorosz<sup>1,#,\*</sup>, Martiniano M. Ricardi<sup>2,#,\*\*</sup>, Laercio Pol Fachin<sup>3</sup>,  
5 Mariana Carignani Sardoy<sup>1</sup>, Eliana Marzol<sup>1</sup>, Silvina Mangano<sup>1</sup>, Diana Rosa Rodríguez García<sup>1</sup>,  
6 Javier Martínez Pacheco<sup>1</sup>, Yossmayer del Carmen Rondón Guerrero<sup>1</sup>, Silvia M. Velasquez<sup>1,\*\*\*</sup>,  
7 Bianca Villavicencio<sup>4</sup>, Marina Ciancia<sup>5</sup>, Georg Seifert<sup>6</sup>, Hugo Verli<sup>4</sup> & José M. Estevez<sup>1,7,†</sup>

8  
9  
10 <sup>1</sup>Fundación Instituto Leloir, Av. Patricias Argentinas 435, Buenos Aires CP C1405BWE, Argentina.

11 <sup>2</sup>Instituto de Fisiología, Biología Molecular y Neurociencias (IFIByNE-CONICET), Departamento de  
12 Fisiología y Biología Molecular y Celular (FBMC), Facultad de Ciencias Exactas y Naturales, Uni-  
13 versidad de Buenos Aires C1428EGA, Argentina.

14 <sup>3</sup>Centro Universitário CESMAC, Maceió, Brazil.

15 <sup>4</sup>Centro de Biotecnología, Universidade Federal do Rio Grande do Sul CP 15005, Porto Alegre  
16 91500-970 RS, Brazil.

17 <sup>5</sup>Universidad de Buenos Aires, Facultad de Agronomía, Departamento de Biología Aplicada y  
18 Alimentos, Cátedra de Química de Biomoléculas, Buenos Aires, Argentina and CONICET-  
19 Universidad de Buenos Aires, Centro de Investigación de Hidratos de Carbono (CIHIDECAR), Bue-  
20 nos Aires, Argentina.

21 <sup>6</sup>University of Natural Resources and Life Science, BOKU Vienna, Department of Applied Genetics  
22 and Cell Biology, Muthgasse 11 A-1190, Vienna, Austria.

23 <sup>7</sup>Centro de Biotecnología Vegetal (CBV), Facultad de Ciencias de la Vida, Universidad Andrés Be-  
24 llo, Santiago, Chile.

25  
26  
27 #co-first authors

28 †Correspondence should be addressed. Email: [jestevez@leloir.org.ar](mailto:jestevez@leloir.org.ar)

29  
30  
31 Characters 38,995

32  
33  
34  
35  
36  
37  
38  
39  
40 \* Current address: Grupo de Investigación Interdisciplinario en Ciencias Naturales, Colegio Gim-  
41 nasio Vermont, 111166 Bogotá, Colombia.

42 \*\* Current address: Developmental Genetics, University of Tübingen, 72076 Tübingen, Germany.

43 \*\*\* Current address: University of Natural Resources and Life Science, BOKU Vienna, Department  
44 of Applied Genetics and Cell Biology, Muthgasse 11 A-1190, Vienna, Austria.

45 **Significance**

46

47 In the plant *Arabidopsis thaliana*, the root epidermis forms in an alternating pattern  
48 atrichoblasts with trichoblast cells that end up developing root hairs (RHs). Atrichoblast cell  
49 fate is directly promoted by the transcription factor GLABRA2 (GL2) while the lack of GL2 al-  
50 lows RH formation. The loss of AGP21 peptide triggers an abnormal RH cell fate in two contig-  
51 uous cells in a similar manner as brassinosteroid (BRs) mutants. In the absence of BR signaling,  
52 BIN2 (a GSK3 like-kinase) in a phosphorylated state, downregulate GL2 expression to trigger  
53 RH cell fate. The absence of AGP21 is able to repress *GL2* expression and activates the expres-  
54 sion of RSL4 and EXP7 root hair proteins.

55

56

57 **Summary**

58

59 Root hairs (RHs) develop from specialized epidermal cells called trichoblasts, whereas epider-  
60 mal cells that lack RHs are known as atrichoblasts. The mechanism controlling root epidermal  
61 cell fate is only partially understood. Root epidermis cell fate is regulated by a transcription  
62 factor complex that promotes the expression of the homeodomain protein GLABRA 2 (GL2),  
63 which blocks RH development by inhibiting ROOT HAIR DEFECTIVE 6 (RHD6). Suppression of  
64 GL2 expression activates RHD6, a series of downstream TFs including ROOT HAIR DEFECTIVE 6  
65 LIKE-4 (RSL4 [Yi et al. 2010]) and their target genes, and causes epidermal cells to develop into  
66 RHs. Brassinosteroids (BRs) influence root epidermis cell fate. In the absence of BRs, phos-  
67 phorylated BIN2 (a Type-II GSK3-like kinase) inhibits a protein complex that directly  
68 downregulates GL2 [Chen et al. 2014]. Here, we show that the genetic and pharmacological  
69 perturbation of the arabinogalactan peptide (AG) AGP21 in *Arabidopsis thaliana*, triggers ab-  
70 errant RH development, similar to that observed in plants with defective BR signaling. We re-  
71 veal that an *O*-glycosylated AGP21 peptide, which is positively regulated by BZR1, a transcrip-  
72 tion factor activated by BR signaling, affects RH cell fate by altering *GL2* expression in a BIN2-  
73 dependent manner. These results suggest that perturbation of a cell surface AGP disrupts BR  
74 responses and inhibits the downstream effect of BIN2 on the RH repressor GL2 in root epider-  
75 mal cells. In addition, AGP21 also acts in a BR-independent, AGP-dependent mode that to-  
76 gether with BIN2 signalling cascade controls RH cell fate.

77

78

79 Word count 241

## 80 Introduction

81 Plant roots not only anchor the plant into the soil but also allow them to absorb water and nu-  
82 trients from the soil. Root hairs (RHs) are single cell protrusions developed from the epidermis  
83 that increase the root surface area exposed to the soil enhancing water and nutrients uptake.  
84 Many factors determine whether, or not, an epidermal cell will develop into a RH. These factors  
85 include both, environmental cues (such as nutrients in the soil) and signals from the plant itself,  
86 such as hormones like brassinosteroids (BRs), ABA, ethylene and auxin (Van Hengel et al. 2004;  
87 Masucci and Schiefelbein 1994, 1996; Kuppusamy et al., 2009). RH cell fate in the model plant  
88 *Arabidopsis* is controlled by a well-known developmental program, regulated by a complex of  
89 transcription factors composed by WEREWOLF (WER)-GLABRA3 (GL3)/ENHANCER OF GLABRA3  
90 (EGL3)-TRANSPARENT GLABRA1 (TTG1) that promotes the expression of the homeodomain pro-  
91 tein GLABRA 2 (GL2) (Ryu et al. 2005; Song et al. 2011; Schiefelbein et al. 2014; Balcerowicz et al.  
92 2015), which ultimately blocks the root hair pathway by inhibiting ROOT HAIR DEFECTIVE 6  
93 (RHD6) (Lin et al. 2015). The suppression of GL2 expression triggers epidermal cells to enter into  
94 the root hair cell fate program by the concomitant activation of RHD6 and a well-defined down-  
95 stream gene network. As a consequence, RH and non-RH cell files are patterned alternately in  
96 rows within the root epidermis. In trichoblasts, a second transcription factor complex composed  
97 by CAPRICE (CPC)-GL3/EGL3-TTG1 suppresses GL2 expression (Schiefelbein et al. 2014), forcing  
98 cells to enter the RH cell fate program via concomitant RHD6 activation and downstream TFs,  
99 including RSL4, and RH genes (Yi et al. 2010). The plant steroid hormones, BRs play essential  
100 roles in regulating many developmental processes (Savaldi-Goldstein et al., 2007; 2010; Hacham  
101 et al., 2011; Yang et al., 2011). BRs are perceived by the receptor kinase BRASSINOSTEROID IN-  
102 SENSITIVE 1 (BRI1) (Li & Chory, 1997; Hothorn et al., 2011; She et al., 2011). One of the BRI1 sub-  
103 strate, BR-SIGNALING KINASE (BSK), transduces the BR signaling through *bri1* SUPPRESSORS 1  
104 (BSU1) to inactivate a GSK3-like kinase BRASSINOSTEROID INSENSITIVE 2 (BIN2), which triggers  
105 high levels of the dephosphorylated form of transcriptional factors BRI1 EMS SUPPRESSOR 1  
106 (BES1)/BRASSINAZOLE RESISTANT 1 (BZR1) in the nucleus to regulate gene expression (Yan et al.  
107 2009; Yang et al., 2011). In recent years, a molecular mechanism was proposed by which BR sig-  
108 naling controls RH cell fate by inhibiting BIN2 phosphorylation activity to modulate *GL2* expres-  
109 sion (Chen et al. 2014). In atrichoblasts, BIN2 phosphorylates TTG1, controlling protein complex  
110 TTG1-WER-GL3/EGL3 activity, and stimulating *GL2* expression (Chen et al. 2014).

111

112 Plant cell surface proteoglycans known as arabinogalactan proteins (AGPs) function in a broad  
113 developmental processes such as cell proliferation, cell expansion, organ extension, and somatic  
114 embryogenesis (Tan et al. 2004; Seifert & Roberts 2007; Pereira et al. 2015; Ma et al. 2018). The  
115 precise mechanisms underlying AGP action in these **multiple** processes are completely unknown  
116 (Ma et al. 2018). AGP peptides are post-translationally modified in the ER-Golgi, undergoing sig-  
117 nal peptide (SP) removal, proline-hydroxylation/Hyp-*O*-glycosylation, and C-terminal GPI anchor  
118 signal (GPI-AS) addition (Schultz et al. 2004; Ma et al. 2018). Processed mature AGP-peptides are  
119 10–13 amino acids long and bear few putative *O*-glycosylation sites (*O*-AG). Few prolines in the  
120 AGP peptides are hydroxylated *in vivo* as Hyp (Hyp=O), suggesting that AGP peptides are *O*-

121 glycosylated at maturity (Schultz et al. 2004). All these posttranslational modifications make the  
122 study of AGPs very complex with almost no defined biological functions for any individual AGP  
123 (Ma et al. 2018). Interestingly, in this work we have identified that disruption of plant specific  
124 AGPs, and in particular of a single *O*-glycosylated AGP peptide (AGP21), interfere in a specific  
125 manner with BR **responses** and BIN2 downstream effect on the repression of RH development.  
126 We have found that an *O*-glycosylated AGP21-peptide positively regulated by the BR transcrip-  
127 tion factor BZR1, impacts on RH cell fate **in a BIN2-dependent manner** by controlling GL2 expres-  
128 sion.

129

## 130 **Results and Discussion**

131

### 132 **AGP perturbation influences root hair (RH) cell fate programming**

133 To determine whether *O*-glycosylated AGPs regulate specific RH developmental processes, we  
134 exposed roots of *Arabidopsis thaliana* to  $\beta$ -glucosyl Yariv ( $\beta$ -Glc-Y), which specifically binds struc-  
135 tures in the *O*-glycans of AGPs: oligosaccharides with at least 5–7 units of 3-linked *O*-galactoses  
136 (Yariv et al. 1967; Kitazawa et al. 2013).  $\beta$ -Glc-Y-linked AGP complexes on the cell surface induce  
137 AGP aggregation and disrupt native protein distribution, triggering developmental reprogram-  
138 ming (Guan & Nothnagel 2004; Sardar et al. 2006).  $\alpha$ -mannosyl Yariv ( $\alpha$ -Man-Y), an analogue  
139 that does not bind to AGPs, served as the control. While  $\alpha$ -Man-Y treatment did not affect RH  
140 cell fate ( $\approx 2$ –5% of total RHs that are contiguous),  $\beta$ -Glc-Y treatment increased contiguous RH  
141 development ( $\approx 30$ –35%) (**Figure S1A**), suggesting that *O*-glycosylated AGPs influence RH cell fate.

142

143 To test whether *O*-glycans on hydroxyproline-rich glycoproteins (HRGPs) alter RH cell fate, we  
144 blocked proline 4-hydroxylase enzymes (P4Hs) that catalyse proline (Pro)-hydroxylation into hy-  
145 droxyl-proline units (Hyp), the subsequent step of HRGP *O*-glycosylation (Velasquez et al. 2011,  
146 2015a). Two P4H inhibitors,  $\alpha,\alpha$ -dipyridyl (DP) and ethyl-3,4-dihydroxybenzoate (EDHB), prevent  
147 Pro-hydroxylation (Barnett 1970; Majamaa et al. 1986); both increased contiguous RH develop-  
148 ment to  $\approx 15$ –20% (**Figure S1B**). Additionally, *p4h5* (a key P4H in roots [Velasquez et al. 2011;  
149 2015a]) and four glycosyltransferase (GT) mutants defective in AGP **and related proteins** *O*-  
150 glycosylation (*hpgt* triple mutant; *ray1*, *galt29A*, and *fut4 fut6*) (see **Table S1**) showed signifi-  
151 cantly increased ( $\approx 8$ –20%) ectopic RH development (**Figure 1A**), substantiating the previous re-  
152 port that the triple mutant *hpgt* mutant has an increased RH density (Ogawa-Ohnishi &  
153 Matsubayashi 2015). These mutants were mostly insensitive to  $\beta$ -Glc-Y; however, the treatment  
154 increased the number of contiguous RHs in *fut4 fut6*, although to a lesser extent than in the wild  
155 type (**Figure 1B**).  $\beta$ -Glc-Y inhibits root cell expansion (Willats & Knox 1996; Ding & Zhu 1997).  
156 Glycosyltransferase (GT) mutations affecting extensin (EXTs) **and related proteins** *O*-  
157 glycosylation (e.g. *rra3* and *sgt1 rra3*; **Table S1**) drastically affect RH cell elongation (Velasquez et  
158 al. 2015b). Intriguingly, these mutations did not affect RH cell fate, and  $\beta$ -Glc-Y stimulated ec-  
159 topic RH development **as in Wt Col-0**, indicating that EXT *O*-glycosylation **might not function** in  
160 RH cell fate reprogramming (**Table S1, Figure 1C**), and specifically *O*-glycans attached to AGPs  
161 **and related glycoproteins** do. *P4H5* and *AGP-related GTs* (e.g. *RAY1*, *GALT29A*, *HPGT1-HPGT3*

162 and *FUT4/FUT6*), are expressed in the root epidermis elongation and differentiation zones (**Fig-**  
163 **ure S2**). Under-arabinosylated AGPs in *ray1* and under-*O*-fucosylated AGPs in *fut4 fut6* show  
164 similar root growth inhibition (Liang et al. 2013; Trypona et al. 2014), highlighting a key role for  
165 AGP *O*-glycans in regulating root cell development, albeit by unknown mechanisms. **These re-**  
166 **sults using DP/EDHB and  $\beta$ -Glc-Y treatments as well as mutants in the AGPs *O*-glycosylation**  
167 **pathway suggest that AGPs and related proteins might be involved in RH cell fate.**

168

### 169 **The AG peptide AGP21 influences RH cell fate**

170 Brassinosteroid (BR) signaling regulates RH cell patterning (Cheng et al. 2015). The BR-insensitive  
171 mutant, *bri1-116*, and *bak1* developed many ( $\approx$ 20%-25%) contiguous RH cells (**Figure S3A**),  
172 resembling plants subjected to  $\beta$ -Glc-Y and DP/EDHB treatments (**Figure S1**). *p4h5*, *hpgt* triple  
173 mutant, *ray1-1*, *galt29A*, and *fut4 fut6* mutants exhibited similar phenotypes, suggesting that  
174 interplay between cell surface AGPs and BR signaling determines RH cell fate. As chromatin-  
175 immunoprecipitation (ChIP)-sequencing and RNA-sequencing indicate that BZR1 directly  
176 upregulates *AGP* expression, most predominantly *AGP21* (Sun et al. 2010), we investigated how  
177 root epidermal BR signalling regulates *AGP21* expression. Since the *AGP21* regulatory region  
178 contains one BZR1 binding motif (E-BOX, CATGTG at -279 bp relative to ATG start codon), we  
179 tested whether BR directly modulates *AGP21* expression. Compared with no treatment, 100 nM  
180 BL (brassinolide, BR's most active form) enhanced of both *AGP21p::GFP* (transcriptional  
181 reporter) and *AGP21p::V-AGP21* (V= Venus tag; translational reporter) expression (**Figure S3B-**  
182 **C**). Expression of *AGP21p::GFP* in *bri1-116* resulted in lower *AGP21* signal than in untreated wild  
183 type (**Figure S3B**), confirming that BR-mediated BZR1 controls *AGP21* expression in the root.  
184 **Trichoblasts and atrichoblasts expressed V-AGP21 peptide in a discontinuous pattern**  
185 **(Figure S1C), indicating that some root epidermal cells expressed AGP21 but some lacked it.**  
186 **Treatment with  $\beta$ -Glc-Y—but not  $\alpha$ -Man-Y—resulted in excess *AGP21p::Venus-AGP21* at**  
187 **transverse cell walls (Figure S1C) confirming the expect effect on aggregating AGPs at the cell**  
188 **surface. These results might indicate AGP21 as a possible link between RH cell fate phenotype**  
189 **and BR responses in root epidermal cells.**

190

191 **Although we screen for abnormal RH cell fate in several AGP-peptide mutants, only AGP21**  
192 **deficient mutant *agp21* (Figure S4A-B), exhibited ectopic contiguous RHs at high levels ( $\approx$ 20%)**  
193 **(Figure 2B). Both *AGP21* expression under its endogenous promoter (*AGP21p::V-AGP21/agp21*)**  
194 **and overexpression (*35Sp::V-AGP21/agp21*) restored a wild type RH phenotype and patterning**  
195 **to *agp21* (Figure 2B), confirming that deficient *AGP21* expression causes contiguous RH**  
196 **development. Furthermore, while  $\beta$ -Glc-Y treatment triggered up to  $\approx$ 35% of contiguous RH (vs.**  
197  **$\approx$ 2–5% induced by  $\alpha$ -Man-Y) in the wild type (Figure S1A), it induced no additional anomalous**  
198 **RH in *agp21* (vs.  $\alpha$ -Man-Y treatment or untreated roots) (Figure 2B). We tested whether the**  
199 **closely related BZR1-induced peptide AGP15 functions with AGP21 (Sun et al. 2010). *agp15***  
200 **(Figure S4C-D) exhibited a milder phenotype than *agp21*, and the double *agp15 agp21* double**  
201 **mutant had no additional effects to *agp21* (Figure S4E). Together, these results confirm that  $\beta$ -**  
202 **Glc-Y might affect *O*-glycosylated AGP21 to stimulate contiguous RH development.**

203

204 **O-glycosylation is required for the correct targeting of the AGP21 peptide to the plasma mem-**  
205 **brane-apoplastic space**

206 To determine whether functional AGP21 requires O-glycosylation, three putative O-glycosylation  
207 sites were mutated (Pro→Ala) (**Figure 2A**) and driven by the endogenous *AGP21* promoter in  
208 *agp21* (*AGP21p::V-AGP21<sup>ALA</sup>/agp21*). Mass spectrometry had detected that all three proline  
209 units (Pro/P) within the AGP21 sequence ATVEAPAPSPTS can be hydroxylated as  
210 ATVEAQAQSOTS (Hyp=Q) (Schultz et al. 2004), indicating likely sites for O-glycosylation. Even  
211 though AGP21<sup>ALA</sup> protein was detected in root epidermal cells (**Figure S5B**), AGP21<sup>ALA</sup> failed to  
212 rescue the *agp21* RH phenotype (**Figure 2B–C**), **suggesting** that Hyp-linked O-glycans in AGP21  
213 are required for its function in RH cell fate. Moreover, β-Glc-Y treatment did not induce anoma-  
214 lous RH cell fate in AGP21<sup>ALA</sup> plants. **Then, we examined whether AGP21 expressed in *Nicotiana***  
215 ***benthamiana* colocalized with the BRI1 co-receptor BAK1 (**Figure 2C**). V-AGP21 partially colocal-**  
216 **ized with BAK1-mRFP protein (**Figure 2C**). When epidermal cells were plasmolyzed, most AGP21**  
217 **signal localized to the apoplast but some remained close to the PM (**Figure S8B**). V-AGP21<sup>ALA</sup>,**  
218 **however, never reached the cell surface; retention in the secretory pathway could indicate that**  
219 **O-glycans direct AGP to the PM–cell surface (**Figure S5A–B**). These data is in agreement with**  
220 **previous reports of a requirement for O-glycans in the secretion and targeting of AGPs and re-**  
221 **lated fasciclin-like AGPs (Xu et al 2008; Xue et al 2017).**

222

223 We tested the hypothesis that AGP21 is processed and modified during its synthesis along the  
224 secretory pathway. Using immunoblot analysis, we examined the apparent molecular weight of  
225 AGP21 peptide in transient AGP21-overexpressing plants and in *AGP21p::V-AGP21* plants (**Fig-**  
226 **ure 2D**). In the overexpressing plants, most AGP21 peptide was detected as a strong broad band  
227 around ≈100–120 kDa with minor bands at ≈80 and ≈55 kDa, whereas endogenously driven  
228 AGP21 produced a stronger band at ≈80 kDa and lacked the band at ≈55 kDa, suggesting that, in  
229 both cases, AGP21 peptide **might be** present in a **putative** tri-O-glycosylated form. Mature pep-  
230 tide with no posttranslational modifications is approximately 30 kDa; the extra bands **could be**  
231 **interpreted as** intermediate single- and di-O-glycosylated forms of AGP21 peptide. An apparent  
232 molecular shift of ≈25–30 kDa for each putative O-glycosylation site in AGP21 accords with  
233 AGP14 peptide, whose protein sequence is highly similar (Ogawa-Ohnishi & Matsubayashi 2015),  
234 and with the electrophoretic migration of an AGP-xylogen molecule that contains two arabino-  
235 galactan-O-Hyp sites (Motose et al. 2004). V-AGP21<sup>ALA</sup>, which lacks O-glycans, is not targeted to  
236 the cell surface, formed puncta structures (**Figure S5B**) and showed one band close to ~55 kDa  
237 (**Figure 2D**) and one band close to ~30 kDa. **It is hypostatized here** that lack of O-glycans V-  
238 AGP21<sup>ALA</sup>'s **may cause to self interactions** and this is compatible with the punctuated structure  
239 visualized in the root epidermal cells (**Figure S5B**). A detailed analysis is required to characterize  
240 O-glycosylation in AGP21 **peptide although it is technically challenging due to its carbohydrate**  
241 **complexity.**

242

243 **O-glycans stabilize AGP21 peptide's functional conformation**

244 To address the effect of *O*-glycan on the conformation and stability of AGP21 peptide, we  
245 modeled a minimal, 15-sugar Hyp-*O*-linked arabinogalactan (AG) structure  
246 ([ATVEAP(O)AP(O)SP(O)TS], **Figure S6A–B**). This is the simplest carbohydrate structure  
247 characterized for a single AGP synthetic peptide (Tan et al. 2004), although more complex  
248 structures were described for several AGPs (Kitazawa et al. 2013). To assess the conformation of  
249 AGP21 peptide and the effect of *O*-glycosylation, molecular dynamics (MD) simulations  
250 considered three non-glycosylated peptides (with alanines [nG-Ala], prolines [nG-Pro], or  
251 hydroxyprolines residues [nG-Hyp], respectively) and one *O*-glycosylated peptide with three  
252 Hyp-*O*-glycans (**Figure S6C**). In the MD simulations, the root mean square deviation (RMSD)  
253 varied up to  $\approx 6$  Å (**Figure S6D**), indicating that peptide structure may have deviated from the  
254 starting type-II polyproline helix. By contrast, larger conformational stabilization effects were  
255 observed in the *O*-glycosylated peptide (**Figure S6E**). Individual residue RMSF analysis indicated  
256 that the peptide's stiffer region depended on the MD conditions applied (**Figure S6F**). To  
257 characterize conformational profiles, we measured the angle formed by four consecutive alpha  
258 carbon atoms ( $\zeta$  angle) (**Table S3**). The  $\zeta$  angle of a type-II polyproline helix is  $-110 \pm 15^\circ$ . In this  
259 context, the *O*-glycosylated AOAOSOTS peptide structure is slightly extended between Pro2–  
260 Thr7, as observed by  $\zeta$  angles 2–4 closer to  $180^\circ$  (**Table S3**). Our analysis suggests that *O*-linked  
261 glycans affect the conformation and stability of AGP21 peptide. How this conformational change  
262 in mature AGP21 peptide without *O*-glycans affects its function in RH cell determination remains  
263 unclear.

264

### 265 **AGP21 acts in a BIN2-dependent pathway to define RH cell fate**

266 We hypothesized that disrupting AGPs activity with  $\beta$ -Glc-Y, a **lack of AGP21 peptide** (*agp21*), or  
267 abnormal glycosylation on AGP **and related proteins**, would interfere with **BR responsiveness**  
268 and RH cell fate. We treated the triple mutant *gsk* (*gsk triple: bin2-3 bil1 bil2*; BIL1, BIN2-like 1  
269 and BIL2, BIN2-like 2), which almost completely lacks RH cells [1], with 5  $\mu$ M  $\beta$ -Glc-Y treatment.  
270 *Gsk triple* exhibited few contiguous RH cells **before and after the treatment** (**Figure 3**), suggest-  
271 ing that  $\beta$ -Glc-Y requires BIN2-BIL1-BIL2 to alter **RH** cell fate. Interestingly,  $\beta$ -Glc-Y induced  **$\approx 40$ -**  
272 **45%** contiguous RHs (**Figure 3**) in the constitutively active mutant *bin2-1* (Li & Nam 2002). These  
273 data suggest that the AGP-mediated RH cell fate reprogramming requires active BIN2, BIL1, and  
274 BIL2 proteins (**Figure 3A**).

275

276 As *BRI1* expression is similar in trichoblasts and atrichoblasts (Fridman et al., 2014), we sought to  
277 determine whether *BRI1* **and downstream BR responses** act differently in these cell types during  
278 RH cell fate determination (**Figures 3B**). We examined the effect of cell type-specific *BRI1* ex-  
279 pression on the percentage of contiguous RHs in three plant lines expressing *BRI1*-GFP, all in the  
280 *bri1-116* background: trichoblast-only (*COBL9p::BRI1-GFP/bri1-116*), atrichoblast-only  
281 (*GL2p::BRI1-GFP/bri1-116*), and expression in both cell types (*GL2p::BRI1-GFP + COBL9p::BRI1-*  
282 *GFP/bri1-116*) (Hacham et al., 2011; Fridman et al., 2014). *BRI1* expression in atrichoblasts only  
283 did not rescue *bri1-116* (plants showed abundant contiguous RHs), the line that expressed *BRI1*  
284 in trichoblasts or in both cell types were similar to wild type (**Figure 3B**). Additionally, only

285 *COBL9p::BRI1/bri1-116* where BRI1 is missing only in atrichoblast cells, was completely insensi-  
286 tive to  $\beta$ -Glc-Y while the other two lines exhibited more contiguous RHs. These data **may** imply  
287 that only the BR-BRI1 pathway in atrichoblasts **is active to promote ectopic RH development and**  
288 **is also sensitive to AGP disruption.**

289

### 290 **Disturbance or absence of AGP21 blocks GL2 expression**

291 We tracked epidermal cell fate and analyzed  $\beta$ -Glc-Y and  $\alpha$ -Man-Y's translational effects on  
292 several markers: an early RH marker (RHD6p::RHD6-GFP), a downstream transcription factor  
293 (RSL4p::RSL4-GFP), a late RH marker (EXP7p::EXP7-GFP), and an atrichoblast marker GL2  
294 (GL2p::GL2-GFP) (**Figure 4A–D**).  $\beta$ -Glc-Y, not  $\alpha$ -Man-Y, repressed GL2 expression and enhanced  
295 RHD6, RSL4 and EXP7 expression in contiguous epidermal cells (**Figure 4A–E**). This corroborates  
296 the effects of both  $\beta$ -Glc-Y and deficiencies in the AGP *O*-glycosylation pathway on contiguous  
297 epidermis cell development. **Then, when** we expressed RSL4p::RSL4-GFP in *agp21*, two  
298 contiguous epidermis cells showed GFP expression, while this rarely occurred in wild type roots.  
299 **The transcriptional reporter** GL2p::GFP/*agp21* showed discontinuous RH patterning similar to  $\beta$ -  
300 Glc-Y treatment (**Figure 4B and 4D**). This result implies feedback between **the lack of AGP21**, GL2  
301 repression, and RHD6-RSL4 and EXP7 upregulation in contiguous epidermal cell development  
302 (**Figure 4E**). Constitutively active *bin2-1* phenocopies *agp21* and  $\beta$ -Glc-Y treatment: it represses  
303 GL2 expression in some epidermal cells and enhances EXP7-GFP in contiguous epidermal cells,  
304 stimulating contiguous RH development (**Figure 4F–G**). To test whether AGP21 (and AGPs in  
305 general), affect BR **responses**, we treated roots with 100 nM BL. Wild type roots exhibited  
306 repressed RH development as previously reported (Cheng et al. 2014); *agp21* and three GT  
307 mutants (*triple hpgt*, *ray1* and *galt29A*) defective in AGP *O*-glycosylation (**Table S1**) were  
308 unaffected by **BL treatment (Figure S6C)**, suggesting that *O*-glycosylated AGP21 (and AGPs) are  
309 required for promoting BR **responses and downstream signalling on RH cell fate.**

310

### 311 **Conclusions**

312 In root epidermal cells, atrichoblast fate is the default, while environmental as well as  
313 endogenous cues like high levels of BRs promotes *GL2* expression in atrichoblasts to repress RH  
314 development (Cheng et al. 2014). In the absence of BRs, active P-BIN2 represses *GL2* expression  
315 and *RHD6* and *RSL4* expression proceeds, triggering RH development in atrichoblasts and  
316 producing contiguous RHs. **Perturbed AGPs and the lack of AGP21 peptide** at the cell surface  
317 stimulate ectopic RH development similar to that observed in BR mutants. BZR1 regulates *AGP21*  
318 expression and the *O*-glycosylated cell surface peptide AGP21 modulates RH cell fate. We  
319 propose a model, in which the *O*-glycosylated AGP21 peptide and BR **responses** are both  
320 dependent on BIN2 (and BIL1-BIL2)-mediated responses, controlling RH cell fate (**Figure S7**). **It**  
321 **still unclear how the cell surface peptide AGP21 is able to trigger a change in RH cell fate in a**  
322 **BIN2-dependent manner. One possibility is that AGP21 peptide might modify the responsiveness**  
323 **to BRs of the co-receptors BRI1-BAK1. In line with this, we failed to detect a direct interaction**  
324 **between V-AGP21 and BAK1-mRFP in a transient expression system (results not shown).**  
325 **Nonetheless, measuring direct physical interactions between O-glycosylated AGP21 and BRI1–**



326 **BAK1 proteins in the apoplast–PM space is a challenge for a future study.** In concordance with  
327 this scenario, other GPI anchor proteins (e.g. like LORELEI-like-GPI-anchored protein 2 and 3,  
328 LRE/LLG2,3) are able to interact with CrRLK1s (e.g. FERONIA and BUP1,2/ANXUR1,2) in the cell  
329 surface of polar growing plant cells (Li et al. 2015; 2016; Lui et al. 2016; Ge et al. 2019; Feng et  
330 al.2019). These results imply an interesting parallel between plant AGPs and animal heparin  
331 sulfate proteoglycans (HSPGs), which are important co-receptors in signaling pathways mediated  
332 by growth factors, including members of Wnt/Wingless, Hedgehog, transforming growth factor-  
333  $\beta$ , and fibroblast growth factor family members (Lin 2004). **A second scenario is that AGP21**  
334 **peptide and BR co-receptors BRI1-BAK1 do not interact in the cell surface and both influence by**  
335 **different pathways BIN2 activity and the downstream RH cell fate program. If this is the case,**  
336 **AGP21 may require others proteins to transduce the signal toward BIN2 in the cytoplasm. Future**  
337 **work should investigate which of these two hypotheses might explain the role of AGP21 peptide**  
338 **in RH cell fate.**

339 **Materials and Methods**

340

341 **Materials and Methods**

342

343 **Growth conditions.** All plant materials used in this study were in the Columbia-0 ecotype back-  
344 ground of *Arabidopsis thaliana*. Seeds were sterilized and placed on half-strength (0.5X)  
345 Murashige and Skoog (MS) medium (Sigma-Aldrich) pH 5.8 supplemented with 0.8% agar. For  
346 root measurements, RNA extraction and confocal microscopy 7-day old seedlings were grown on  
347 square plates placed vertically at 22°C with continuous light, after stratification in dark at 4°C for  
348 5 days on the plates. Seedlings on plates were transferred to soil and kept in the greenhouse in  
349 long-day conditions to obtain mature plants for transformation, genetic crossing, and amplifica-  
350 tion of seeds.

351

352 **Plant material.** For identification of homozygous T-DNA knockout lines, genomic DNA was ex-  
353 tracted from rosette leaves. Confirmation by PCR of a unique band corresponding to T-DNA in-  
354 sersion in the target genes AGP15 (At5G11740: SALK\_114736), AGP21 (At1G55330:  
355 SALK\_140206), HPGT1-HPGT3 (AT5G53340: SALK\_007547, AT4G32120: SALK\_070368,  
356 AT2G25300: SALK\_009405) GALT29A (At1G08280: SALK\_030326; SALK\_113255;  
357 SAIL\_1259\_C01) and RAY1 (At1G70630: SALK\_053158) were performed using an insertion-  
358 specific Lb1.3 for SALK lines or Lb1 for SAIL lines. Primers used are listed in **Table S4**. The stable  
359 transgenic lines used in this study are summarized in **Table S2**.

360

361 **Pharmacological treatments.** ethyl-3,4-dihydroxybenzoate (EDHB) and  $\alpha,\alpha$ -Bipyridyl (DP)  
362 D216305 SIGMA-ALDRICH were used as P4Hs inhibitors. DP chelates the cofactor  $Fe^{2+}$  [9] and the  
363 EDHB interacts with the oxoglutarate-binding site of P4Hs (Majamaa et al. 1986). Specific Yariv  
364 phenylglycoside (for 1,3,5-tri-(p-glycosyloxyphenylazo)-2,4,6-trihydroxybenzene),  $\beta$ -glucosyl  
365 Yariv phenylglycoside ( $\beta$ -Glc-Yariv) was used for AGP-depletion (Kitazawa et al.2013).  $\alpha$ -  
366 mannosyl Yariv phenylglycoside ( $\alpha$ -Man-Yariv) was used as negative control for phenylglycoside  
367 treatment. Both,  $\beta$ -Glc-Y and  $\alpha$ -Man-Y are Yariv-phenylglycosides and its specificity for AGPs  
368 relies on the  $\beta$ -configuration of the glycosyl residues attached to the  
369 phenylazotrihydroxybenzene core (Yariv et al. 1967). DP, EDHB, or Yariv reagents were added to  
370 MS media when MS plates were made. Seedlings were grown for 4 days in MS 0.5X media and  
371 then transferred for 3 days more to MS 0.5X plates with DP, EDHB, or Yariv reagents at the con-  
372 centration indicated.

373

374 **Quantification of RH cell fate.** In order to determine the RH patterning, images of root tips were  
375 taken using an Olympus stereomicroscope at maximum magnification (50X). The presence of  
376 contiguous RH was analyzed using ImageJ, starting from the differentiation zone to the elonga-  
377 tion zone. The amount of contiguous RH was expressed as a percentage of total RH for rectangu-  
378 lar root areas of 200  $\mu$ m in width x 2mm in length (n=20) with three biological replicates. Quanti-  
379 tative and statistical analysis was carried on using GraphPad software. To analyze the alteration  
380 in RH cell fate, root cell walls of reporter lines were stained with 5  $\mu$ g/ml propidium iodide and

381 confocal microscopy images were taken using a Zeiss LSM 710 Pascal microscope, 40X objective  
382 N/A= 1.2.

383

384 **AGP21 variants.** AGP21 promoter region (AGP21p) comprising 1,5 Kbp upstream of +1 site was  
385 amplified by PCR and cloned into pGWB4 to obtain AGP21p::GFP construct. Synthetic DNA was  
386 designed containing full length AGP21 cDNA and Venus fluorescent protein cDNA between  
387 AGP21 signal sequence and the mature polypeptide (Venus-AGP21), containing Gateway<sup>TM</sup> (Life  
388 Technologies) attB1 and attB2 sites. Recombinase-mediated integration of the PCR fragment  
389 was made into pEntry4Dual. pEntry4Dual/Venus-AGP21 construction was recombined into the  
390 vector pGWB2 (Invitrogen, Hygromycin R) in order to overexpress Venus-AGP21 under 35S mo-  
391 saic virus promoter (35Sp::Venus-AGP21). Also, Venus-AGP21 construct was cloned into pGWB1  
392 (no promoter, no tag) and AGP21p was sub-cloned in the resulting vector to express AGP21 re-  
393 porter under the control of its endogenous promoter (AGP21p::Venus-AGP21). Wild type and T-  
394 DNA *agp21* mutant plants were transformed by using *Agrobacterium* (strain GV3101+pSoup).  
395 Plants were selected with hygromycin (30 µg/ml) and several independent transgenic plants  
396 were isolated for each construct. At least three homozygous independent transgenic lines of Col-  
397 0/AGP21p::GFP, *agp21*/AGP21p::Venus-AGP21 and *agp21*/35Sp::AGP21-GFP were obtained and  
398 characterized.

399

400 **Gene expression analysis.** For RT-PCR analysis, total RNA was isolated from roots of 7-day-old  
401 seedlings using RNeasy Plant Mini Kit (Qiagen) according to the manufacturer's instructions.  
402 cDNA synthesis was achieved using M-MLV reverse transcriptase (Promega). PCR reactions were  
403 performed in a T-ADVANCED S96G (Biometra) using the following amplification program: 4 min  
404 at 95°C, followed by 35 cycles of 20 secs at 95°C, 30 secs at 57°C and 30 secs at 72°C. RT-PCR was  
405 performed to assess AGP15 and AGP21 transcript levels in wild type and T-DNA mutant *agp15*  
406 and *agp21*. PP2A was used as an internal standard. All primers used are listed in **Table S4**.

407

408 **Confocal microscopy.** Confocal laser scanning microscopy was performed using Zeiss LSM 510  
409 Meta and Zeiss LSM 710 Pascal. Fluorescence was analyzed by using laser lines of 488 nm for  
410 GFP or 514 nm for YFP excitation, and emitted fluorescence was recorded between 490 and 525  
411 nm for GFP and between 530 and 600 nm for YFP (40X objective, N/A= 1.2). Z series was done  
412 with an optical slice of 2µm, and intensities was summed for quantification of fluorescence  
413 along a segmented line using plot profile command in Image J, five replicates for each of five  
414 roots were observed.

415

416 **AGP21 Immunoblotting detection.** Proteins were extracted from roots of 7-day-old seedlings  
417 using extraction buffer (20mM TRIS-HCl pH8.8, 150mM NaCl, 1mM EDTA, 20% glycerol, 1mM  
418 PMSF, 1X protease inhibitor Complete<sup>®</sup> Roche) at 4°C. After centrifugation at 21.000g at 4°C for  
419 20min, protein concentration in the supernatant was measured and equal protein amounts were  
420 loaded onto a 6% SDS- PAGE gel. Proteins were separated by electrophoresis and transferred to  
421 nitrocellulose membranes. Anti-GFP mouse IgG (Roche Applied Science) was used at a dilution of

422 1:1.000 and it was visualized by incubation with goat anti-mouse IgG secondary antibodies con-  
423 jugated to horseradish peroxidase (1:10.000) followed by a chemiluminescence reaction (Clarity  
424 <sup>™</sup> Western ECL Substrate, BIO-RAD).

425

426 **Transient expression assays in *Nicotiana benthamiana*.** To test the sub-cellular localization of  
427 AGP21, 5-day-old *N. benthamiana* leaves were infiltrated with *Agrobacterium* strains (GV3101)  
428 carrying 35Sp::Venus-AGP21 and BAK1-RFP constructs. After 2 days, images of the lower leaf  
429 epidermal cells were taken using a confocal microscope (LSM5 Pascal) to analyze Venus-AGP21  
430 expression. Plasmolysis was done using 800 mM mannitol.

431

432 **Molecular dynamics (MD) simulations.** MD simulations were performed on two non-  
433 glycosylated and seven glycosylated Ala1-Pro2-Ala3-Pro4-Ser5-Pro6-Thr7-Ser8 (APAPSPTS) pep-  
434 tides, in which the starting structure was constructed as a type-II polyproline helix, with  $\phi \sim -75$   
435 and  $\psi \sim 145$ . The non-glycosylated motifs differ by the presence of alanine (AAAASATS), proline  
436 (APAPSPTS) or 4-*trans*-hydroxyproline (AOAOSOTS) residues. At the same time, the glycosylated  
437 motifs reflect different peptide glycoforms, constructed as full glycosylated (AOAOSOTS). Every  
438 *O*-glycosylation site was filled with an arabinogalactan oligosaccharide moiety (**Supplementary**  
439 **Item 5**), in which the *O*-glycan chains and carbohydrate-amino acid connections were construc-  
440 ted based on the most prevalent geometries obtained from solution MD simulations of their  
441 respective disaccharides, as previously described (Pol-Fachin & Verli 2012), thus generating the  
442 initial coordinates for glycopeptide MD calculations. Such structures were then solvated in rec-  
443 tangular boxes using periodic boundary conditions and the SPC water model (Berendsen et al.  
444 1984). Both carbohydrate and peptide moieties were described under GROMOS96 43a1 force  
445 field parameters, and all MD simulations and analyses were performed with GROMACS simula-  
446 tion suite, version 4.5.4 (Hess et al. 2008). The Lincs method (Hess et al. 1997) was applied to  
447 constrain covalent bond lengths, allowing an integration step of 2 fs after an initial energy mini-  
448 mization using the Steepest Descents algorithm. Electrostatic interactions were calculated with  
449 the generalized reaction-field method Tironi et al. (1995). Temperature and pressure were kept  
450 constant at 310 K and 1.0 atom, respectively, by coupling (glyco)peptides and solvent to external  
451 baths under V-rescale thermostat Bussi et al. 2007) and Berendsen barostat (Berendsen et al.  
452 1987) with coupling constants of  $t = 0.1$  and  $t = 0.5$ , respectively, via isotropic coordinate scaling.  
453 The systems were heated slowly from 50 to 310 K, in steps of 5 ps, each one increasing the refe-  
454 rence temperature by 50 K. After this thermalization, all simulations were further extended to  
455 100 ns. See **Table S3**.

456

#### 457 **Acknowledgements**

458 We thank ABRC (Ohio State University) for providing T-DNA lines seed lines. We would like to  
459 thank Dr. Sigal Savaldi-Goldstein for providing GL2p::BRI1-GFP, COBL9p::BRI1-GFP and  
460 GI2p::BRI1-GFP + COBL9p::BRI1-GFP reporter lines, Dr. Paul Dupree for providing *fut4* and *fut6*  
461 mutant lines, Dr. Santiago Mora García for providing *bzr1* and *bes1* mutant lines, Dr. Ana Caño  
462 Delgado for providing seeds of BRI1-GFP, *bin2-1* and BZR-YFP, and Dr. Gustavo Gudesblat for

463 providing *gsk triple* mutant seeds. Dr. Malcolm Bennet and Dr. Liam Dolan for the RHD6-GFP and  
464 RSL4-GFP lines. This work was supported by grants from ANPCyT (PICT2014-0504, PICT2016-  
465 0132 and PICT2017-0066) and ICGEB CRP/ARG16-03 to J.M.E.

466

467 **Author Contribution**

468 C.B, J.G.D and M.M.R performed most of the experiments, analysed the data and wrote the pa-  
469 per. L.P.F and H.V. performed molecular dynamics simulations and analysed this data. M.C.S  
470 analysed the phenotype of glycosyltransferase mutants and BRI1-GFP reporters. B.V. analysed  
471 the molecular dynamics simulations data. M.C synthesized  $\alpha$ -Man-Y and  $\beta$ -Glc-Y reagents. G.S.  
472 commented on the project, read the manuscript, and commented on the results. S.M. and E.M.  
473 analysed the data and commented on the results. J.M.P., D.R.R.M., Y.R., and S.M.V commented  
474 on the results. J.M.E. designed research, supervised the project, and wrote the paper. This  
475 manuscript has not been published and is not under consideration for publication elsewhere. All  
476 the authors have read the manuscript and have approved this submission.

477 **References**

- 478 Balcerowicz, D., Schoenaers, S. and Vissenberg, K. (2015). Cell fate determination and the switch  
479 from diffuse growth to planar polarity in Arabidopsis root epidermal cells. *Front. Plant Sci.* 6,  
480 949
- 481 Barnett, N.M. (1970) Dipyridyl-induced Cell Elongation and Inhibition of Cell Wall Hydroxyproline  
482 Biosynthesis. *Plant Physiol* 45: 188-191
- 483 Cheng, Y., Zhu, W., Chen, Y., Ito, S., Asami, T. and Wang, X. (2014). Brassinosteroids control root  
484 epidermal cell fate via direct regulation of a MYBbHLH-WD40 complex by GSK3-like kinases.  
485 *eLife* 3, e02525
- 486 Ding L. and Zhu JK. (1997). A role for arabinogalactan-proteins in root epidermal cell expansion.  
487 *Planta* 203:289–94
- 488 Feng H., Liu C., Fu R., Zhang M., Li H., Shen L., Wei Q., Sun X., Xu L., Ni B., and Li C. (2019).  
489 LORELEI-LIKE GPI-ANCHORED PROTEINS 2/3 regulate pollen tube growth as chaperones and  
490 coreceptors for ANXUR/BUPS receptor kinases in *Arabidopsis*. *Mol. Plant.*  
491 doi.org/10.1016/j.molp.2019.09.004.
- 492 Ge Z., Zhao Y., Liu M-Ch, Zhou L-Z, Wang, L., Zhong S., Hou, S., Jiang, J., Liu, T., Huang, Q., Xiao, J.,  
493 Gu, H., Wu H-M, Dong J., Dresselhaus T., Cheung A.Y., Qu L-J. (2019) LLG2/3 are co-receptors  
494 in BUPS/ANX-RALF signaling to regulate Arabidopsis pollen tube Integrity. *Current Biology* 29,  
495 1–10.
- 496 Guan Y, Nothnagel EA (2004) Binding of arabinogalactan proteins by Yariv phenylglycoside trig-  
497 gers wound-like responses in *Arabidopsis* cell cultures. *Plant Physiol* 135:1346–136
- 498 Hacham Y, Holland N, Butterfield C, Ubeda-Tomas S, Bennett MJ, Chory J, Savaldi-Goldstein S.  
499 (2011). Brassinosteroid perception in the epidermis controls root meristem size. *Development*  
500 (*Cambridge, England*) 138:839–848. doi: 10.1242/dev.061804.
- 501 Hothorn M, Belkhadir Y, Dreux M, Dabi T, Noel JP, Wilson IA, Chory J. (2011). Structural basis of  
502 steroid hormone perception by the receptor kinase BRI1. *Nature* 474:467–471. doi:  
503 10.1038/nature10153.
- 504 Hutten SJ, Hamers DS, Aan den Toorn M, van Esse W, Nolles A, BuÈcherl CA, et al. (2017) Visuali-  
505 zation of BRI1 and SERK3/BAK1 nanoclusters in *Arabidopsis* roots. *PLoS ONE* 12(1):  
506 e0169905.doi:10.1371/journal.pone.01699056
- 507 Kitazawa K, Tryfona T, Yoshimi Y, et al. (2013).  $\beta$ -Galactosyl Yariv Reagent Binds to the  $\beta$ -1,3-  
508 Galactan of Arabinogalactan Proteins. *Plant Physiology* 161(3): 1117-1126.  
509 doi:10.1104/pp.112.211722.
- 510 Kuppusamy KT, Chen AY, Nemhauser JL. (2009). Steroids are required for epidermal cell fate es-  
511 tablishment in Arabidopsis roots. *Proceedings of the National Academy of Sciences of the*  
512 *United States of America* 106: 8073–8076. doi: 10.1073/pnas.0811633106.
- 513 Li J, Chory J. (1997). A putative leucine-rich repeat receptor kinase involved in brassinosteroid  
514 signal transduction. *Cell* 90:929–938. doi: 10.1016/S0092-8674(00)80357-8
- 515 Li J, Nam KH (2002) Regulation of brassinosteroid signaling by a GSK3/SHAGGY-like kinase. *Sci-*  
516 *ence* 295(5558):1299–1301
- 517 Li, C., Wu, H.-M., and Cheung, A.Y. (2016). FERONIA and her pals: functions and mechanisms.  
518 *Plant Physiol.* 171, 2379–2392.
- 519 Li, C., Yeh, F.L., Cheung, A.Y., Duan, Q., Kita, D., Liu, M.C., Maman, J., Luu, E.J., Wu, B.W., Gates,  
520 L., et al. (2015). Glycosylphosphatidylinositol anchored proteins as chaperones and co-  
521 receptors for FERONIA receptor kinase signaling in Arabidopsis. *eLife* 4, e06587

- 522 Liang,Y., Basu,D., Pattathil,S., Xu, W.-L., Venetos, A., Martin, S.L.,et al. (2013). Biochemical and  
523 physiological characterization of fut4 and fut6 mutants defective in arabinogalactan-protein  
524 fucosylation in *Arabidopsis*. *J. Exp. Bot.* 64, 5537–5551. doi:10.1093/jxb/ert321
- 525 Lin X. (2004). Functions of heparan sulfate proteoglycans in cell signaling during development.  
526 *Development* 131 (24): 6009-6021.
- 527 Lin, Q., Ohashi,Y., Kato,M., Tsuge,T., Gu,H., Qu,L.J., and Aoyama, T. (2015). GLABRA2 directly  
528 suppresses basic helix-loop-helix transcription factor genes with diverse functions in root hair  
529 development. *Plant Cell* 27: 2894–2906
- 530 Liu, X., Castro, C., Wang, Y., Noble, J., Ponvert, N., Bundy, M., Hoel, C., Shpak, E., and Palanivelu,  
531 R. (2016). The role of LORELEI in pollen tube reception at the interface of the synergid cell and  
532 pollen tube requires the modified eight-cysteine motif and the receptor-like kinase FERONIA.  
533 *Plant Cell* 28, 1035–1052.
- 534 Ma Y, Zeng W, Bacic A, Johnson K (2018). AGPs trough time and space. *Annual Plant Reviews* 1,  
535 1-38.
- 536 Majamaa K, Gunzler V, Hanauske-Abel HM, Myllyla R, Kivirikko KI (1986) Partial identity of the 2-  
537 oxoglutarate and ascorbate binding sites of prolyl 4-hydroxylase. *J Biol Chem* 261: 7819-7823
- 538 Masucci JD, Schiefelbein JW. (1994). The *rhd6* mutation of *Arabidopsis thaliana* alters root-hair  
539 initiation through an auxin- and ethylene-associated process. *Plant Physiology* 106:1335–  
540 1346. doi: 10.1104/pp.106.4.1335.
- 541 Masucci JD, Schiefelbein JW. (1996). Hormones act downstream of *TTG* and *GL2* to promote root  
542 hair outgrowth during epidermis development in the *Arabidopsis* root. *The Plant Cell* 8:1505–  
543 1517. doi: 10.1105/tpc.8.9.1505.
- 544 Motose, H. et al. (2004) A proteoglycan mediates inductive interaction during plant vascular de-  
545 velopment. *Nature* 429, 873–878
- 546 Ogawa-Ohnishi, M., Matsubayashi, Y. (2015). Identification of three potent hydroxyproline O-  
547 galactosyltransferases in *Arabidopsis*. *Plant J.* 81, 736–746. doi: 10.1111/tpj.12764
- 548 Pereira, A.M., Pereira, L.G., and Coimbra, S. (2015). Arabinogalactan proteins: rising attention  
549 from plant biologists. *Plant Reprod.* 28, 1–15.
- 550 Ryu KH, Kang YH, Park YH, Hwang I, Schiefelbein J, Lee MM. (2005). The WEREWOLF MYB protein  
551 directly regulates *CAPRICE* transcription during cell fate specification in the *Arabidopsis* root  
552 epidermis. *Development (Cambridge, England)* 132:4765–4775. doi: 10.1242/dev.02055.
- 553 Sardar HS, Yang J, Showalter AM (2006) Molecular interactions of arabinogalactan proteins with  
554 cortical microtubules and F-actin in Bright Yellow-2 tobacco cultured cells. *Plant Physiol* 142:  
555 1469–1479
- 556 Savaldi-Goldstein S, Peto C, Chory J. (2007). The epidermis both drives and restricts plant shoot  
557 growth. *Nature* 446:199–202. doi: 10.1038/nature05618
- 558 Schiefelbein, J., Huang, L. and Zheng, X. (2014). Regulation of epidermal cell fate in *Arabidopsis*  
559 roots: the importance of multiple feedback loops. *Front. Plant Sci.* 5, 47
- 560 Schultz CJ, Ferguson KL, Lahnstein J, Bacic A (2004) Post-translational modifications of  
561 arabinogalactan-peptides of *Arabidopsis thaliana*: endoplasmic reticulum and  
562 glycosylphosphatidylinositol-anchor signal cleavage sites and hydroxylation of proline. *J Biol*  
563 *Chem* 279: 45503–45511
- 564 Seifert, G.J. and Roberts, K. (2007). The biology of arabinogalactan proteins. *Annual Review of*  
565 *Plant Biology* 58: 137–161
- 566 She J, Han Z, Kim TW, Wang J, Cheng W, Chang J, Shi S, Wang J, Yang M, Wang ZY, Chai J. (2011).  
567 Structural insight into brassinosteroid perception by BRI1. *Nature* 474:472–476. doi:  
568 10.1038/nature10178

- 569 Song SK, Ryu KH, Kang YH, Song JH, Cho YH, Yoo SD, Schiefelbein J, Lee MM. (2011). Cell fate in  
570 the Arabidopsis root epidermis is determined by competition between WEREWOLF and CA-  
571 PRICE. *Plant Physiology* 157:1196–1208. doi: 10.1104/pp.111.185785.
- 572 Sun, Y., Fan, X.Y., Cao, D.M., Tang, W., He, K., Zhu, J.Y., He, J.X., Bai, M.Y., Zhu, S., Oh, E., et al.  
573 (2010). Integration of brassinosteroid signal transduction with the transcription network for  
574 plant growth regulation in Arabidopsis. *Dev. Cell* 19, 765–777
- 575 Tan, L., Showalter, A.M., Egelund, J., Hernandez-Sanchez, A., Doblin M.S., and Bacic, A. (2012).  
576 Arabinogalactan-proteins and the research challenges for these enigmatic plant cell surface  
577 proteoglycans. *Front. Plant Sci.* 3: 140
- 578 Tan, L., Qiu, F., Lampert, D.T.A., and Kieliszewski, M.J. (2004). Structure of a hydroxyproline  
579 (Hyp)-arabinogalactan polysaccharide from repetitive Ala-Hyp expressed in transgenic  
580 *Nicotiana tabacum*. *J. Biol. Chem.* 279: 13156–13165
- 581 Tryfona, T., Theys, T.E., Wagner, T., Stott, K., Keegstra, K., Dupree, P. (2014). Characterisation of  
582 FUT4 and FUT6  $\alpha$ -(1→2)-fucosyltransferases reveals that absence of root arabinogalactan  
583 fucosylation increases *Arabidopsis* root growth salt sensitivity. *PLoS ONE* 9:e93291.  
584 doi:10.1371/journal.pone.0093291
- 585 Van Hengel AJ, Barber C, Roberts K. (2004). The expression patterns of arabinogalactan-protein  
586 *AtAGP30* and *GLABRA2* reveal a role for abscisic acid in the early stages of root epidermal  
587 patterning. *The Plant Journal: for Cell and Molecular Biology* 39:70–83. doi: 10.1111/j.1365-  
588 313X.2004.02104.x.
- 589 Velasquez, S.M., Ricardi, M.M., Dorosz, J.G., Fernandez, P.V., Nadra, A.D., Pol-Fachin, L., Egelund,  
590 J., Gille, S., Ciancia, M., Verli, H., et al. (2011). O-glycosylated cell wall extensins are essential  
591 in root hair growth. *Science* 332:1401–1403.
- 592 Velasquez, SM, Ricardi MM, Poulsen CP, Oikawa A, Dilokpimol A, Halim A, et al. (2015a). Com-  
593 plex regulation of prolyl-4-hydroxylases impacts root hair expansion. *Mol Plant.* 8:734–46.
- 594 Velasquez, S.M., Marzol, E., Borassi, C., Pol-Fachin, L., Ricardi, M.M., Mangano, S., et al. (2015b).  
595 Low sugar is not always good: Impact of specific O-glycan defects on tip growth in *Arabidop-*  
596 *sis*. *Plant Physiol.* 168, 808–813. doi: 10.1104/pp.114.255521
- 597 Wang L, Li H, Lv X, Chen T, Li R, Xue Y, et al. Spatiotemporal Dynamics of the BRI1 Receptor and  
598 its Regulation by Membrane Microdomains in Living Arabidopsis Cells. *Mol Plant.* 2015;  
599 8(9):1334-1349
- 600 Willats W.G. and Knox, J.P. (1996). A role for arabinogalactan-proteins in plant cell expansion:  
601 evidence from studies on the interaction of  $\beta$ -glucosyl Yariv reagent with seedlings of *Ara-*  
602 *bidopsis thaliana*. *Plant J.* 9:919–25
- 603 Xu, J., Tan, L., Lampert, D.T.A., Showalter, A.M., and Kieliszewski, M.J. (2008). The O-Hyp glyco-  
604 sylation code in tobacco and Arabidopsis and a proposed role of Hyp-glycans in secretion.  
605 *Phytochemistry* 69: 1631–1640
- 606 Xue H., Veit, C., Abas, L., Tryfona, T., Maresch, D., Ricardi, M.M., Estevez, J.M., Strasser R., Seifert  
607 G.J. (2017). *Arabidopsis thaliana* *FLA4* functions as a glycan-stabilized soluble factor via its  
608 carboxy proximal Fasciclin 1 domain. *Plant J.* 10.1111/tpj.13591
- 609 Yan Z, Zhao J, Peng P, Chihara RK, Li J. (2009). BIN2 functions redundantly with other Arabidopsis  
610 GSK3-like kinases to regulate brassinosteroid signaling. *Plant Physiology* 150:710–721. doi:  
611 10.1104/pp.109.138099
- 612 Yang CJ, Zhang C, Lu YN, Jin JQ, Wang XL. (2011). The mechanisms of brassinosteroids' action:  
613 from signal transduction to plant development. *Molecular Plant* 4:588–600. doi:  
614 10.1093/mp/ssr020



- 615 Yariv J, Lis H, Katchalski E (1967) Precipitation of arabic acid and some seed polysaccharides by  
616 glycosylphenylazo dyes. *Biochem J* 105(1):1C–2C
- 617 Yi, K., Menand, B., Bell, E., and Dolan, L. (2010). A basic helix-loop-helix transcription factor con-  
618 trols cell growth and size in root hairs. *Nat. Genet.* 42, 264–267. doi: 10.1038/ng.529
- 619 Zavaliev R., Dong, X., Epel B.L. (2016) Glycosylphosphatidylinositol (GPI) modification serves as a  
620 primary plasmodesmal targeting signal. *Plant Physiology.* 172(2): 1061-1073

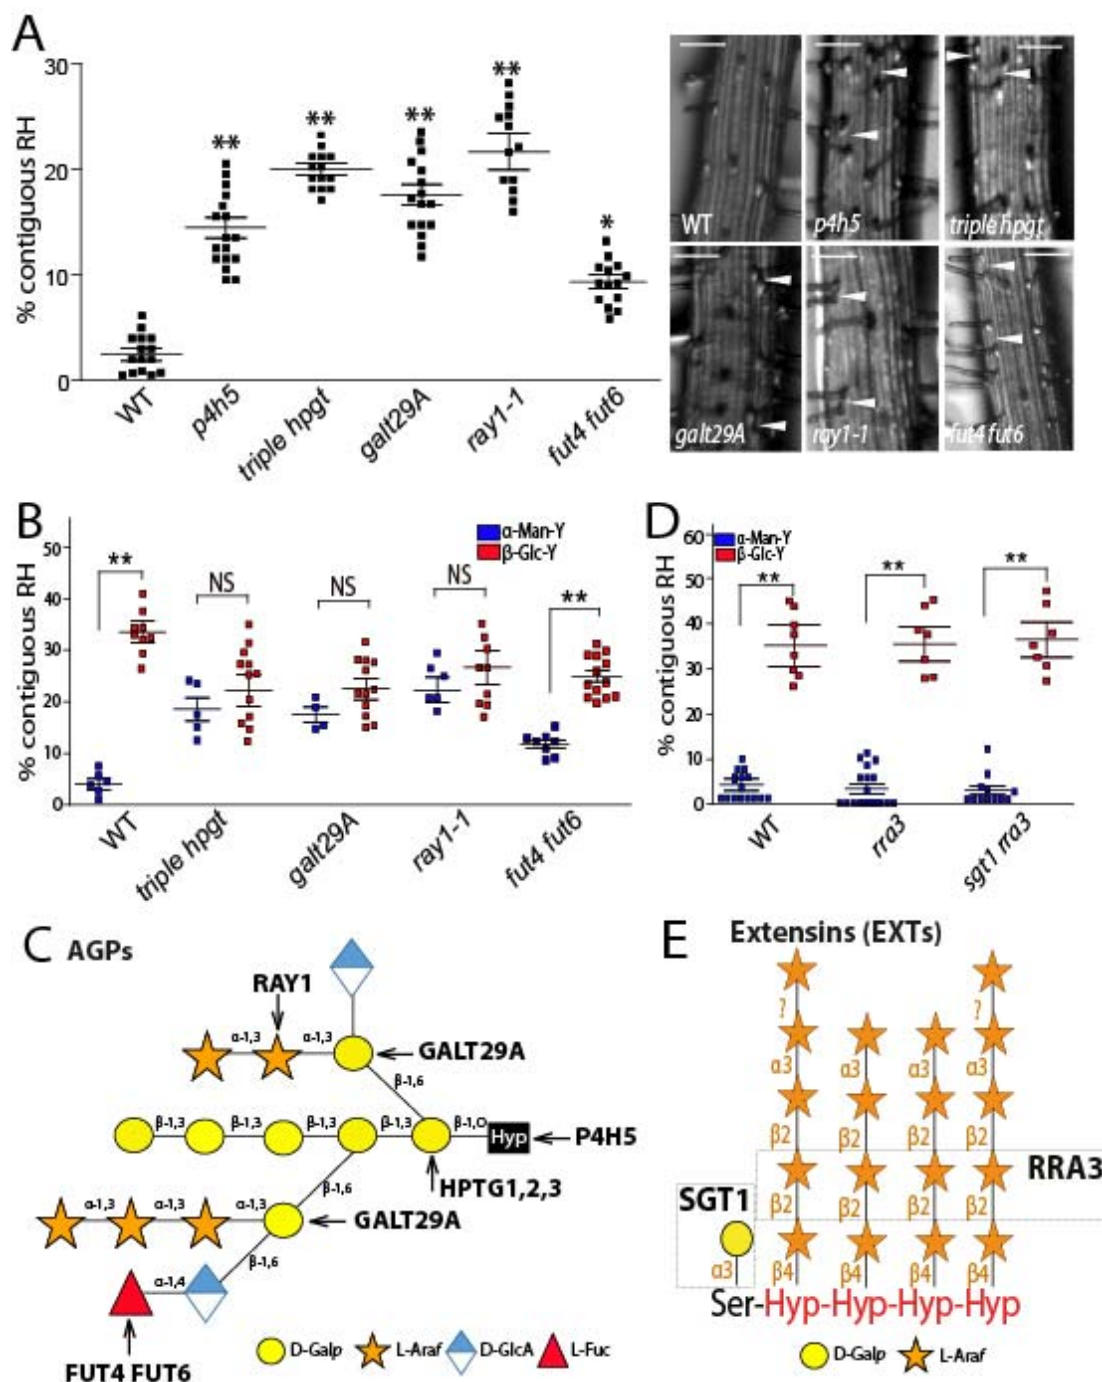

621  
622

623 **Figure 1. Contiguous RH phenotype in O-underglycosylated AGPs phenocopy BR mutants.**

624 (A) RH phenotype in the *p4h5* mutant and in four glycosyltransferase mutants (*triple hpgt*, *ray1*,  
625 *galt29A*, and *fut4 fut6*) that act specifically on AGP O-glycosylation. Right, selected pictures.  
626 Arrowheads indicated two contiguous RHs. Scale bar= 50  $\mu$ m.

627 (B) RH phenotype in three glycosyltransferase (GT) mutants (*triple hpgt*, *ray1*, *galt29A* and *fut4*  
628 *fut6*) that act specifically on AGP O-glycosylation. Effect on contiguous RH phenotype in roots  
629 treated with 5 $\mu$ M  $\alpha$ -Mannosyl Yariv ( $\alpha$ -Man-Y) or 5 $\mu$ M  $\beta$ -Glucosyl Yariv ( $\beta$ -Glc-Y).

630 (C) The mutants used in (B) for the GTs involved in AGP O-glycosylation are indicated.

631 (D) RH phenotype in two glycosyltransferase mutants (*rra3* and *rra3 sgt1*) that act specifically on  
632 EXT *O*-glycosylation. Effect on contiguous RH phenotype in roots treated with 5 $\mu$ M  $\alpha$ -Mannosyl  
633 Yariv ( $\alpha$ -Man-Y) or  $\beta$ -Glucosyl Yariv ( $\beta$ -Glc-Y).  
634 (E) The mutants used in (D) for the GTs involved in EXT *O*-glycosylation are indicated.  
635 (A, B and D) *P*-value of one-way ANOVA, (\*\*)  $P < 0.001$ , (\*)  $P < 0.01$ . NS= not significant different.  
636 Error bars indicate  $\pm$ SD from biological replicates.  
637 See also Figure S1-S4.

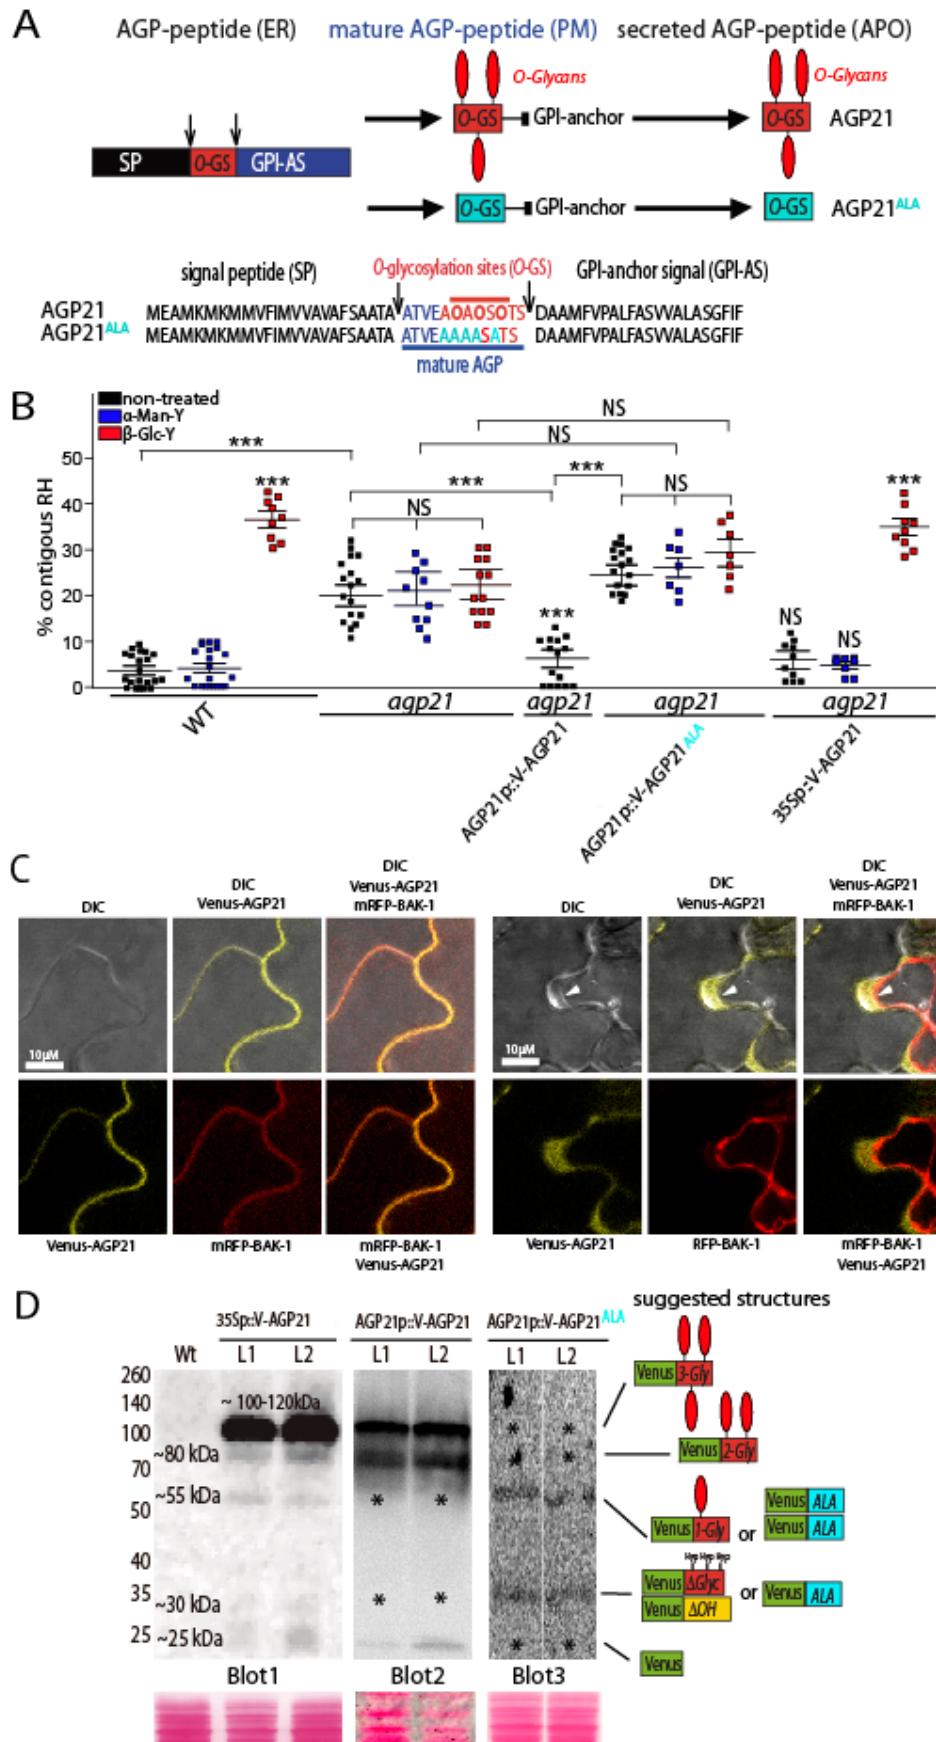

639 **Figure 2. O-glycosylated AGP21 peptide at the cell surface modulates RH cell fate.**

640 (A) Identified AGP21 peptide acting on root epidermis development. AGP21 peptide sequence  
641 and its posttranslational modifications carried out in the secretory pathway. The mature AGP21  
642 peptide contains only 10-13 aa in length. APO= Apoplast. ER=Endoplasmic Reticulum. GPI  
643 anchor= GlycosylPhosphatidylinositol (GPI) anchor. PM=Plasma membrane.

644 (B) Contiguous RH phenotype in *agp21*, complemented *agp21* mutant with AGP21p::V-AGP21  
645 and with 35Sp::V-AGP21 constructs as well as AGP21p::V-AGP21<sup>ALA</sup> expression in *agp21*. Only  
646 one line is shown. P-value of one-way ANOVA, (\*\*) P<0.001, (\*) P<0.01. NS= not significant  
647 differences. Error bars indicate ±SD from biological replicates.

648 (C) Co-localization of AGP21-Venus with BAK1-mRFP at the plasma membrane of epidermal cells  
649 in *Nicotiana Benthamiana*. Scale bar= 10 µm. Cross section of expression levels across BAK1-  
650 RFP coexpressed with AGP21-Venus. On the left, plasmolysis was induced with 800 mM  
651 Mannitol uncovering an apoplastic plus plasma membrane AGP21 localization. Scale bar= 10 µm.  
652 Arrowheads indicate plasma membrane located AGP21. Scale bar= 50 µm.

653 (D) Immunoblot analysis of two stable lines expressing 35Sp::V-AGP21 (L1-L2) and two lines  
654 expressing AGP21p::V-AGP21 (L1-L2) and two lines expressing AGP21p::V-AGP21<sup>ALA</sup> (L1-L2). Each  
655 blot is an independent experiment. Putative Venus-AGP21 structures are indicated on the right  
656 based on the apparent molecular weight. O-glycans are indicated as red elongated balloons.  
657 ΔOH = non-hydroxylated. ΔGly = without O-glycans. 1-Gly to 3-Gly = 1 to 3 sites with Hyp-O-  
658 glycosylation. Asterisk indicates missing AGP21 glycoforms or lack of Venus protein.

659 See also Figure S4-S6.

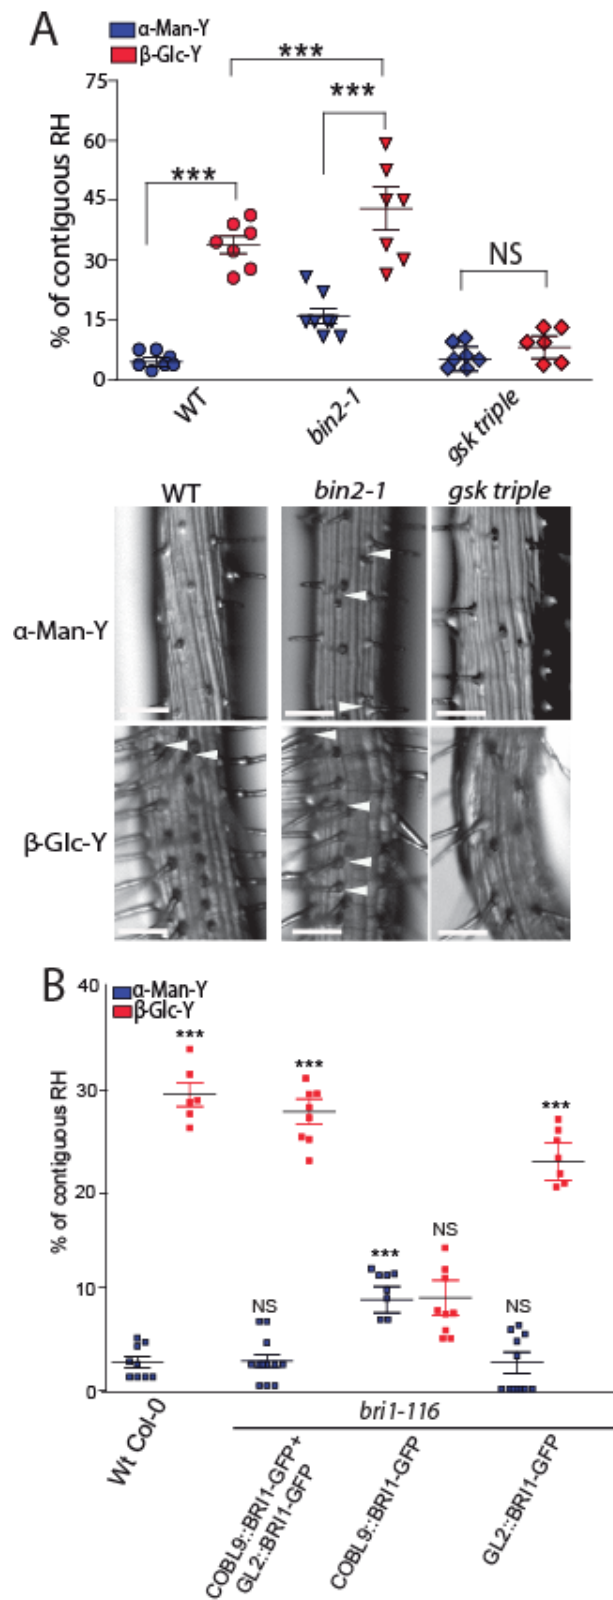

660

661 **Figure 3. Perturbation of AGPs requires active BRI1 expression in atrichoblast cells and**

662 **downstream BIN2-BIL1-BIL2 proteins to triggers changes in RH cell fate.**

663 (A) Contiguous RH phenotype in roots treated with 5 $\mu$ M  $\beta$ -Glucosyl Yariv ( $\beta$ -Glc-Y) or 5 $\mu$ M  $\alpha$ -  
664 Mannosyl Yariv ( $\alpha$ -Man-Y). Scale bar= 20  $\mu$ m. *P*-value of one-way ANOVA, (\*\*\*)  $P < 0.001$ , (\*)  
665  $P < 0.05$ . NS= not significant differences. Error bars indicate  $\pm$ SD from biological replicates.  
666 Arrowheads indicated two contiguous RHs.  
667 (B) Effect of the BRI1 differential expression on the development of contiguous RH. BRI1 is active  
668 when expressed in atrichoblast cells (under GL2 promoter).  
669 See also Figure S5.

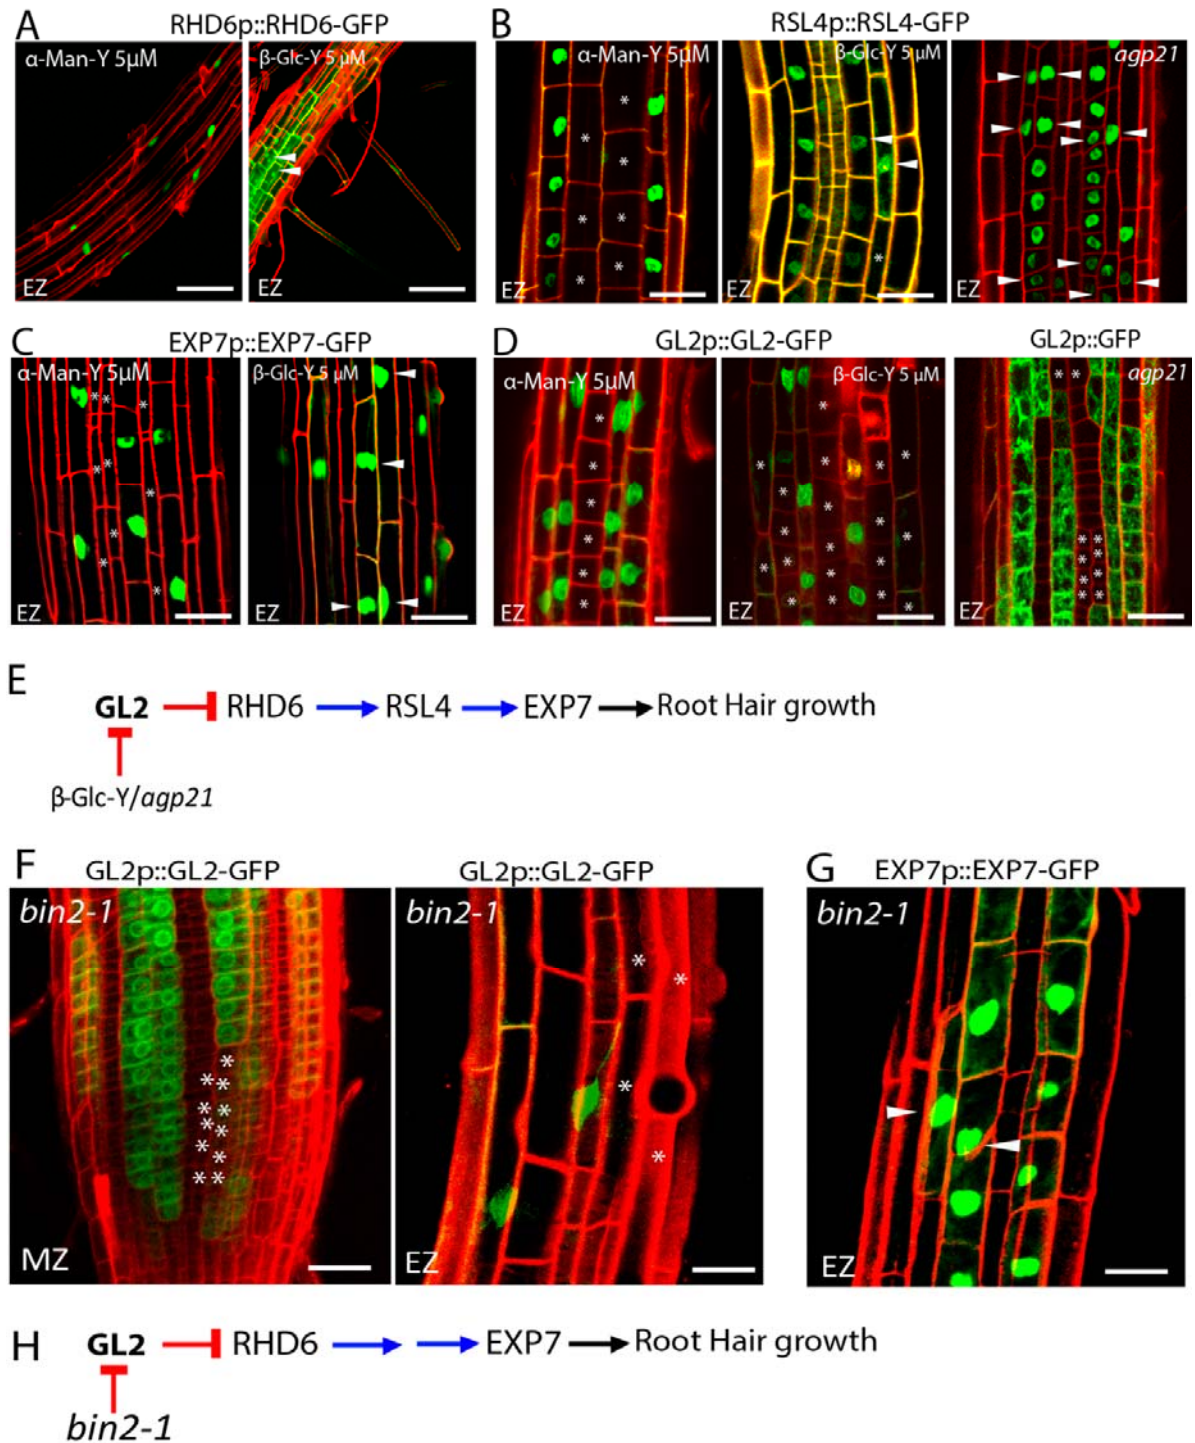

670

671

672 **Figure 4. AGPs disruption, the lack of AGP21, and *bin2-1* block the RH repressor GLABRA2**  
 673 **(GL2) and triggers RHD6-RSL4-EXP7 expression in some atrichoblast cells.**

674 The effect of β-Glucosyl Yariv (β-Glc-Y), α-Mannosyl Yariv (α-Man-Y), and the absence of AGP21  
 675 peptide were monitored on several markers to study epidermis cell fate.

676 (A) RHD6 (RHD6p::RHD6-GFP) as an early RH marker.

677 (B) A downstream RHD6 factor RSL4 (RSL4p::RSL4-GFP).



- 678 (C) The RSL4-gene target EXP7 (EXP7p::EXP7-GFP).  
679 (D) The main RH repressor GL2 (GL2p::GL2-GFP). (A-D) Arrowheads indicate expression of a  
680 given marker in two contiguous epidermis cell lines. Asterisks indicate absence of expression.  
681 Scale bar= 20  $\mu$ m.  
682 (E) Proposed sequence of events triggered by  $\beta$ -Glucosyl Yariv ( $\beta$ -Glc-Y) or the lack of AGP21  
683 peptide that leads to abnormal RH development.  
684 (F) GL2 expression in the *bin2-1* background in the Meristematic Zone (MZ) and Elongation Zone  
685 (EZ) of the root.  
686 (G) The RH marker EXP7 expression in the *bin2-1* background in the Elongation Zone (EZ) of the  
687 root. (F-G) Arrowheads indicate expression of a given marker in two contiguous epidermal cell  
688 lines. Asterisks indicated absence of expression. Scale bar= 10  $\mu$ m.  
689 (H) Proposed sequence of events triggered by *bin2-1* that leads to abnormal RH development.  
690 See also Figure S6.
